# Supplementary material
Source: PubMed Central journal article supplement (PMC2665917)
Supplement: NIHMS86406-supplement-1_si_001.pdf [file NIHMS86406-supplement-1_si_001.pdf]

# Rhenium(VII) Catalysis of Prins Cyclization Reactions

Kwanruthai Tadpetch and Scott D. Rychnovsky\*

*Department of Chemistry, 1102 Natural Sciences II, University of California, Irvine, California, 92697-2025*

*srychnov@uci.edu*

## SUPPORTING INFORMATION

### TABLE OF CONTENTS

|                                                     | Page |
|-----------------------------------------------------|------|
| General Experimental Details.....                   | S2   |
| General Experimental Procedures.....                | S3   |
| Characterization Data and Experimentals.....        | S4   |
| <sup>1</sup> H and <sup>13</sup> C NMR Spectra..... | S16  |

**General Experimental Details.** All moisture sensitive reactions were performed under a positive pressure of argon in flame- or oven-dried glassware using standard septa/syringe techniques. Dichloromethane ( $\text{CH}_2\text{Cl}_2$ ), diethyl ether ( $\text{Et}_2\text{O}$ ), toluene (PhMe) were degassed and dried by filtration through alumina according to the procedure by Grubbs.<sup>1</sup> Chloroform ( $\text{CHCl}_3$ ), ethyl acetate (EtOAc), nitromethane ( $\text{MeNO}_2$ ), hexanes and acetonitrile (MeCN) were distilled over  $\text{CaH}_2$  under nitrogen or argon at atmospheric pressure prior to use. All commercially available reagents were used as received, unless otherwise stated. Compounds **1**, **11-R**, and **11-S** were prepared according to published procedures.<sup>2</sup> Thin layer chromatography (TLC) was performed on Whatman K6F (250  $\mu\text{m}$ ) silica gel plates and visualized using *p*-anisaldehyde stain. Melting points are uncorrected.  $^1\text{H}$  NMR and  $^{13}\text{C}$  NMR spectra were recorded at ambient temperature at 500 and 125 MHz, respectively.  $^1\text{H}$  NMR spectra are reported in ppm on the  $\delta$  scale and referenced to the internal tetramethylsilane. The data are presented as follows: chemical shift, multiplicity (s = singlet, d = doublet, t = triplet, q = quartet, m = multiplet, br = broad, app = apparent), coupling constant(s) in Hertz (Hz), and integration.  $^{13}\text{C}$  NMR spectra are reported in ppm relative to  $\text{CDCl}_3$  (77.07 ppm). HPLC analysis was performed using a CHIRALCEL OD-H column and a hexane/isopropanol mobile phase.

---

<sup>1</sup> Pangborn, A. B.; Giardello, M. A.; Grubbs, R. H.; Rosen, R. K.; Timmers, F. J. *Organometallics* **1996**, *15*, 1518–1520.

<sup>2</sup> (a) Nokami, J.; Nomiyama, K.; Matsuda, S.; Imai, N.; Kataoka, K. *Angew. Chem. Int. Ed.* **2003**, *42*, 1273–1276. (b) Nokami, J.; Ohga, M.; Nakamoto, H.; Matsubara, T.; Hussain, I.; Kataoka, K. *J. Am. Chem. Soc.* **2001**, *123*, 9168–9169.

## Experimental Procedures.

### Preparation of Triphenylsilyl Perrhenate ( $\text{O}_3\text{ReOSiPh}_3$ )<sup>3</sup>

In a glove box,  $\text{Re}_2\text{O}_7$  (0.53 g, 1.1 mmol) and triphenylsilanol (0.60 g, 2.2 mmol) was added to a 20-mL vial. The vial was removed from the glove box. Dry toluene (7 mL) was then added and the mixture was stirred at room temperature under argon for 1.5 h. The clear liquid portion of the mixture was transferred via a syringe to a flame dried flask. Solvent was then removed *in vacuo*. The crude product was dissolved in a small amount of dry ether and left in the freezer overnight. After removal of residual ether,  $\text{O}_3\text{ReOSiPh}_3$  was obtained as white solids (0.63 g, 57%). Isolated  $\text{O}_3\text{ReOSiPh}_3$  could be stored in the freezer ( $-20\text{ }^\circ\text{C}$ ) for approximately 3 months without decomposition. The complex decomposed slowly at ambient temperature, turning to greenish color.  $^1\text{H NMR}$  (500 MHz,  $\text{C}_6\text{D}_6$ )  $\delta$  7.42–7.39 (m, 6H), 7.16–7.12 (m, 3H), 7.07–7.04 (m, 6H).  $^1\text{H NMR}$  data matched those previously reported by Grubbs.<sup>3</sup>

### General Procedure for $\text{O}_3\text{ReOSiPh}_3$ -Catalyzed Prins Cyclization

To an oven-dried flask was added homoallylic alcohol (0.40 mmol, 1 equiv) and 4 mL of solvent (0.1 M). To this solution was added aldehyde (0.52–0.60 mmol, 1.3–1.5 equiv) and  $\text{O}_3\text{ReOSiPh}_3$  (0.02 mmol, 5 mol%). The reaction mixture was stirred at room temperature under an atmosphere of argon and was judged complete upon disappearance of the homoallylic alcohol by TLC analysis. Solvent was then removed *in vacuo*, and the crude product was purified by flash chromatography (40–60% diethyl ether/hexanes).

---

<sup>3</sup> Morrill, C.; Beutner, G. L.; Grubbs, R. H. *J. Org. Chem.* **2006**, *71*, 7813–7825.

**Characterization Data.**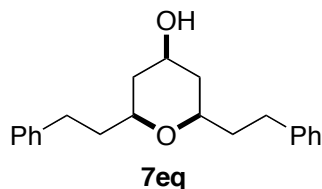

**2,6-Diphenyltetrahydropyran-4-ol (7eq).** White solid: mp 94–96 °C;  $^1\text{H}$  NMR (500 MHz,  $\text{CDCl}_3$ )  $\delta$  7.30–7.19 (m, 10H), 3.75 (tt,  $J = 10.7, 4.6$  Hz, 1H), 3.27–3.23 (m, 2H), 2.87 (ddd,  $J = 14.0, 9.3, 5.3$  Hz, 2H), 2.73 (ddd,  $J = 13.8, 8.7, 7.7$  Hz, 2H), 1.98–1.91 (m, 4H), 1.75 (dddd,  $J = 13.5, 9.5, 7.4, 4.0$  Hz, 2H), 1.41 (br s, 1H), 1.20 (q,  $J = 11.4$  Hz, 2H);  $^{13}\text{C}$  NMR (125 MHz,  $\text{CDCl}_3$ )  $\delta$  142.2, 128.6, 128.4, 125.8, 74.4, 68.3, 41.5, 37.8, 32.0; IR (KBr) 3392, 3026, 2941, 2920, 1059, 700  $\text{cm}^{-1}$ ; HRMS (ES/MeOH)  $m/z$  calcd for  $\text{C}_{21}\text{H}_{26}\text{NaO}_2$  ( $\text{M} + \text{Na}$ ) $^+$  333.1830, found 333.1835.

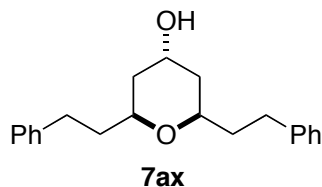

**2,6-Diphenyltetrahydropyran-4-ol (7ax).** White solid: mp 69–72 °C;  $^1\text{H}$  NMR (500 MHz,  $\text{CDCl}_3$ )  $\delta$  7.30–7.17 (m, 10H), 4.25 (quintet,  $J = 2.8$  Hz, 1H), 3.76–3.71 (m, 2H), 2.89 (ddd,  $J = 14.3, 9.8, 5.2$  Hz, 2H), 2.72 (ddd,  $J = 13.7, 9.4, 7.1$  Hz, 2H), 1.86 (dtd,  $J = 14.2, 9.2, 5.2$  Hz, 2H), 1.70 (dddd,  $J = 13.6, 10.7, 7.0, 3.8$  Hz, 2H), 1.64 (dd,  $J = 14.7, 2.3$  Hz, 2H), 1.54–1.49 (m, 2H), 1.30 (d,  $J = 2.90$  Hz, 1H);  $^{13}\text{C}$  NMR (125 MHz,  $\text{CDCl}_3$ )  $\delta$  142.4, 128.60, 128.4, 125.8, 70.7, 65.0, 39.0, 38.1, 32.0; IR (KBr) 3392, 3026, 2918, 1093, 750, 700  $\text{cm}^{-1}$ ; HRMS (ES/MeOH)  $m/z$  calcd for  $\text{C}_{21}\text{H}_{26}\text{NaO}_2$  ( $\text{M} + \text{Na}$ ) $^+$  333.1830, found 333.1836.

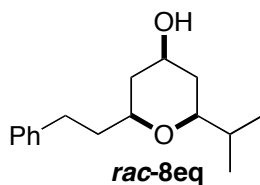

**2-Isopropyl-6-phenethyltetrahydropyran-4-ol (8eq).** Colorless oil:  $^1\text{H}$  NMR (500 MHz,  $\text{CDCl}_3$ )  $\delta$  7.29–7.25 (m, 2H), 7.19–7.16 (m, 3H), 3.74 (tt,  $J = 10.7, 4.6$  Hz, 1H), 3.22–3.17 (m, 1H), 2.92 (ddd,  $J = 11.1, 7.6, 1.6$  Hz, 1H), 2.81 (ddd,  $J = 13.9, 9.0, 5.2$  Hz, 1H), 2.70 (ddd,  $J = 13.8, 8.3, 8.3$  Hz, 1H), 2.00–1.97 (m, 1H), 1.93–1.85 (m, 2H), 1.75–1.67 (m, 2H), 1.19–1.10 (m, 2H), 1.02 (d,  $J = 6.7$  Hz, 3H), 0.92 (d,  $J = 6.8$  Hz, 3H);  $^{13}\text{C}$  NMR (125 MHz,  $\text{CDCl}_3$ )  $\delta$  142.3, 128.6, 128.4, 125.8, 80.7, 74.0, 68.8, 41.5, 38.4, 37.8, 33.2, 31.8, 19.0, 18.8; IR (thin film) 3367, 3028, 2951, 2871, 1050, 700  $\text{cm}^{-1}$ ; HRMS (ES/MeOH)  $m/z$  calcd for  $\text{C}_{16}\text{H}_{24}\text{NaO}_2$  ( $\text{M} + \text{Na}$ ) $^+$  271.1674, found 271.1676.

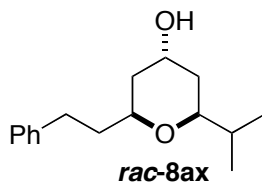

**2-Isopropyl-6-phenethyltetrahydropyran-4-ol (8ax).** Colorless oil (5:1 inseparable mixture with **7ax**):  $^1\text{H}$  NMR (500 MHz,  $\text{CDCl}_3$ ) *major component*:  $\delta$  7.29–7.25 (m, 2H), 7.22–7.15 (m, 3H), 4.26 (quintet,  $J = 2.8$  Hz, 1H), 3.71–3.66 (m, 1H), 3.37 (ddd,  $J = 11.6, 7.3, 1.8$  Hz, 1H), 2.83 (ddd,  $J = 14.2, 9.4, 5.1$  Hz, 1H), 2.75–2.66 (m, 1H), 1.81 (dtd,  $J = 14.2, 9.1, 5.1$  Hz, 1H), 1.68–1.63 (m, 2H), 1.62–1.56 (m, 2H), 1.50–1.42 (m, 2H), 1.35 (br s, 1H), 1.10 (d,  $J = 6.7$  Hz, 3H), 0.90 (d,  $J = 6.8$  Hz, 3H);  $^{13}\text{C}$  NMR (125 MHz,  $\text{CDCl}_3$ ) *major component*:  $\delta$  142.5, 128.6, 128.3, 125.7, 76.7, 70.5, 65.2, 39.1, 38.1, 36.0, 33.4, 31.9, 19.0, 18.7; IR (thin film) 3390, 3028, 2947, 1057, 737, 700  $\text{cm}^{-1}$ ; HRMS (ES/MeOH)  $m/z$  calcd for  $\text{C}_{16}\text{H}_{24}\text{NaO}_2$  ( $\text{M} + \text{Na}$ ) $^+$  271.1674, found 271.1674.

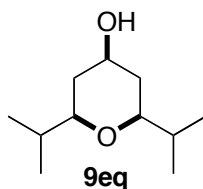

**2,6-Diisopropyltetrahydropyran-4-ol (9eq).** Colorless oil;  $^1\text{H}$  NMR (500 MHz,  $\text{CDCl}_3$ )  $\delta$  3.76 (tt,  $J = 10.7, 4.6$  Hz, 1H), 2.92 (ddd,  $J = 11.2, 6.6, 1.4$  Hz, 2H), 1.95 (app dd,  $J = 11.7, 4.6$  Hz, 2H), 1.47 (br s, 1H), 1.09 (ddd,  $J = 12.0, 11.3, 11.3$  Hz, 2H), 0.95 (d,  $J = 6.7$  Hz, 6H), 0.89 (d,  $J = 6.8$  Hz, 6H);  $^{13}\text{C}$  NMR (125 MHz,  $\text{CDCl}_3$ )  $\delta$  80.5, 69.3, 38.4, 33.2, 18.8, 18.7; IR (thin film) 3351, 2958, 2875, 1469, 1367, 1047  $\text{cm}^{-1}$ ; HRMS (ES/MeOH)  $m/z$  calcd for  $\text{C}_{11}\text{H}_{22}\text{NaO}_2$  ( $\text{M} + \text{Na}$ ) $^+$  209.1517, found 209.1522.

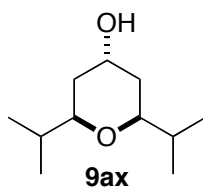

**2,6-Diisopropyltetrahydropyran-4-ol (9ax).** Colorless oil:  $^1\text{H}$  NMR (500 MHz,  $\text{CDCl}_3$ )  $\delta$  4.29 (quintet,  $J = 2.9$  Hz, 1H), 3.34 (ddd,  $J = 11.7, 7.2, 1.3$  Hz, 2H), 1.68 (dd,  $J = 14.0, 2.2$  Hz, 2H), 1.64–1.58 (m, 2H), 1.45–1.39 (m, 2H), 0.96 (d,  $J = 6.7$  Hz, 6H), 0.87 (d,  $J = 6.8$  Hz, 6H);  $^{13}\text{C}$  NMR (125 MHz,  $\text{CDCl}_3$ )  $\delta$  76.6, 65.3, 35.9, 33.4, 18.8, 18.7; IR (thin film) 3365, 2958, 2875, 1471, 1385, 1070  $\text{cm}^{-1}$ ; HRMS (ES/MeOH)  $m/z$  calcd for  $\text{C}_{11}\text{H}_{22}\text{NaO}_2$  ( $\text{M} + \text{Na}$ ) $^+$  209.1517, found 209.1520.

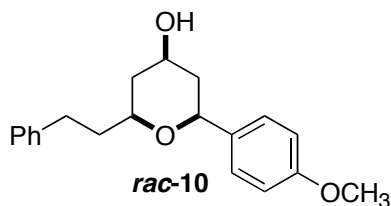

**2-(4-Methoxyphenyl)-6-phenethyltetrahydropyran-4-ol (10).** Light yellow solid: mp = 112–114 °C;  $^1\text{H}$  NMR (500 MHz,  $\text{CDCl}_3$ )  $\delta$  7.32 (d,  $J = 8.7$  Hz, 2H), 7.29–7.26 (m, 2H), 7.20–7.17 (m, 3H), 6.90 (app d,  $J = 8.7$  Hz, 2H), 4.30 (dd,  $J = 11.4, 1.6$  Hz, 1H), 3.92 (tt,  $J = 10.8, 4.8$  Hz, 1H), 3.81 (s, 3H), 3.48–3.43 (m, 1H), 2.81 (ddd,  $J = 14.1, 9.4, 5.7$  Hz, 1H), 2.77–2.71 (m, 1H), 2.21–2.18 (m, 1H), 2.03–1.95 (m, 2H), 1.82 (dddd,  $J = 13.8, 9.4, 7.2, 4.5$  Hz, 1H), 1.53–1.46 (m, 2H), 1.31 (ddd,  $J = 12.0, 11.3, 11.2$  Hz, 1H);  $^{13}\text{C}$  NMR (125 MHz,  $\text{CDCl}_3$ )  $\delta$  159.0, 142.2, 134.4, 128.6, 128.4, 127.3, 125.8, 113.8, 74.8, 68.6, 55.4, 42.8, 41.0, 37.6, 31.7; IR (KBr) 3382, 3026, 2943, 1248, 829, 700  $\text{cm}^{-1}$ ; HRMS (ES/MeOH)  $m/z$  calcd for  $\text{C}_{20}\text{H}_{24}\text{NaO}_3$  ( $\text{M} + \text{Na}$ ) $^+$  335.1623, found 335.1625.

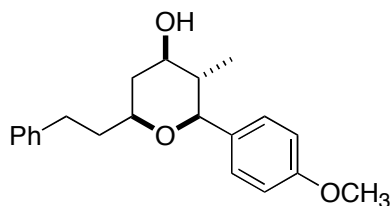

**2-(4-Methoxyphenyl)-3-methyl-6-phenethyltetrahydropyran-4-ol.** White solid: mp 85–86 °C;  $[\alpha]_{\text{D}}^{25} = -78.3$  ( $c$  0.51,  $\text{CHCl}_3$ );  $^1\text{H}$  NMR (500 MHz,  $\text{CDCl}_3$ )  $\delta$  7.28–7.25 (m, 4H), 7.18–7.15 (m, 3H), 6.89 (d,  $J = 8.6$  Hz, 2H), 3.84 (d,  $J = 10.0$  Hz, 1H), 3.81 (s, 3H), 3.49–3.44 (m, 2H), 2.73–2.68 (m, 2H), 2.04 (ddd,  $J = 12.3, 4.7, 1.7$  Hz, 1H), 1.99–1.91 (m, 1H), 1.79 (dddd,  $J = 14.0, 9.2, 7.1, 5.0$  Hz, 1H), 1.57–1.53 (m, 2H), 1.47 (ddd,  $J = 12.1, 11.3, 11.3$  Hz, 1H), 0.77 (d,  $J = 6.5$  Hz, 3H);  $^{13}\text{C}$  NMR (125 MHz,  $\text{CDCl}_3$ )  $\delta$  159.2, 142.2, 133.0, 128.8, 128.6, 128.3, 125.8, 113.8, 84.1, 74.8, 74.1, 55.3, 45.2, 41.0, 37.5, 31.5, 13.3; IR (KBr) 3424, 3022, 2962, 1456, 1047, 737  $\text{cm}^{-1}$ ;

HRMS (ES/MeOH)  $m/z$  calcd for  $C_{21}H_{26}NaO_3$  ( $M + Na$ )<sup>+</sup> 349.1780, found 349.1769.

Enantiomeric excess was calculated from HPLC analysis using CHIRALCEL OD-H column eluting with 5% isopropanol/hexane (flow rate = 1 ml/min): retention time = 26.82 min, retention time of (+)-enantiomer = 19.99 min.

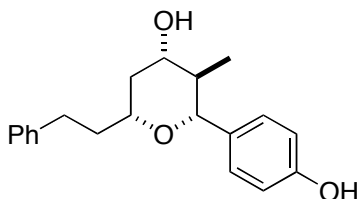

**2-(4-Hydroxyphenyl)-3-methyl-6-phenethyltetrahydropyran-4-ol.** Light yellow solid: mp 183–184 °C;  $[\alpha]_D^{25} = +65.0$  ( $c$  0.50, MeOH);  $^1H$  NMR (500 MHz,  $CDCl_3$ )  $\delta$  7.28–7.25 (m, 2H), 7.21 (d,  $J = 8.5$  Hz, 2H), 7.17 (t,  $J = 8.7$  Hz, 3H), 6.81 (d,  $J = 8.5$  Hz, 2H), 4.76 (s, 1H), 3.83 (d,  $J = 10.0$  Hz, 1H), 3.49–3.46 (m, 2H), 2.76–2.65 (m, 2H), 2.04 (ddd,  $J = 12.3, 4.7, 1.7$  Hz, 1H), 1.99–1.91 (m, 1H), 1.79 (dddd,  $J = 13.8, 9.3, 7.1, 4.8$  Hz, 1H), 1.60–1.52 (m, 2H), 1.47 (ddd,  $J = 12.1, 11.7, 11.3$  Hz, 1H) 0.77 (d,  $J = 6.6$  Hz, 3H);  $^{13}C$  NMR (125 MHz,  $CDCl_3$ )  $\delta$  155.8, 142.1, 132.5, 129.0, 128.6, 128.3, 125.8, 115.2, 84.0, 74.8, 74.1, 45.2, 41.0, 37.5, 31.5, 13.3; IR (KBr) 3237, 2914, 1227, 1038, 829, 700  $cm^{-1}$ ; HRMS (ES/MeOH)  $m/z$  calcd for  $C_{20}H_{24}NaO_3$  ( $M + Na$ )<sup>+</sup> 335.1623, found 335.1620.

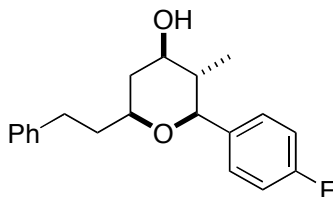

**2-(4-Fluorophenyl)-3-methyl-6-phenethyltetrahydropyran-4-ol.** White solid: mp 91–93 °C;  $[\alpha]_D^{25} = -65.6$  ( $c$  0.51,  $CHCl_3$ );  $^1H$  NMR (500 MHz,  $CDCl_3$ )  $\delta$  7.32–7.25 (m, 4H), 7.19–7.15 (m,



3H), 7.04 (t,  $J = 8.7$  Hz, 2H), 3.87 (d,  $J = 10.0$  Hz, 1H), 3.49–3.46 (m, 2H), 2.76–2.65 (m, 2H), 2.05 (ddd,  $J = 12.4, 4.6, 1.8$  Hz, 1H), 1.99–1.91 (m, 1H), 1.80 (dddd,  $J = 14.2, 9.2, 7.1, 5.1$  Hz, 1H), 1.56–1.43 (m, 2H), 0.77 (d,  $J = 6.5$  Hz, 3H);  $^{13}\text{C}$  NMR (125 MHz,  $\text{CDCl}_3$ )  $\delta$  162.4 (d,  $^1J(\text{CF}) = 245.5$ ), 142.0, 136.6, 129.2 (d,  $^3J(\text{CF}) = 7.5$ ), 128.5, 128.4, 125.8, 115.2 (d,  $^2J(\text{CF}) = 21.4$ ), 83.8, 74.9, 73.9, 45.4, 40.9, 37.5, 31.5, 13.2; IR (KBr) 3414, 2966, 2871, 1604, 1223, 837  $\text{cm}^{-1}$ ; HRMS (ES/MeOH)  $m/z$  calcd for  $\text{C}_{20}\text{H}_{23}\text{FNaO}_2$  ( $\text{M} + \text{Na}$ ) $^+$  337.1580, found 337.1585. Enantiomeric excess was calculated from HPLC analysis using CHIRALCEL OD-H column eluting with 5% isopropanol/hexane (flow rate = 1 ml/min): retention time = 19.87 min, retention time of (+)-enantiomer = 15.08 min.

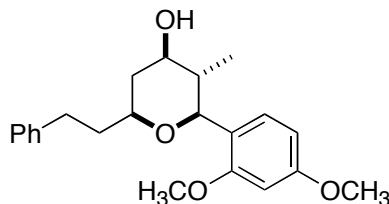

**2-(2,4-Dimethoxyphenyl)-3-methyl-6-phenethyltetrahydropyran-4-ol.** Colorless oil:  $[\alpha]_{\text{D}}^{25} = -50.4$  ( $c$  0.60,  $\text{CHCl}_3$ );  $^1\text{H}$  NMR (500 MHz,  $\text{CDCl}_3$ )  $\delta$  7.32 (d,  $J = 8.5$  Hz, 1H), 7.27–7.24 (m, 2H), 7.18–7.17 (m, 3H), 6.53 (dd,  $J = 8.5, 2.3$  Hz, 1H), 6.45 (d,  $J = 2.3$  Hz, 1H), 4.43 (d,  $J = 10.1$  Hz, 1H), 3.81 (s, 6H), 3.50–3.48 (m, 2H), 2.72–2.68 (m, 2H), 2.02 (app dd,  $J = 12.3, 3.5$  Hz, 1H), 1.97–1.90 (m, 1H), 1.76 (dddd,  $J = 13.8, 8.9, 7.3, 5.1$  Hz, 1H), 1.59–1.52 (m, 2H), 1.44 (ddd,  $J = 11.7, 11.6, 11.3$  Hz, 1H), 0.78 (d,  $J = 6.6$  Hz, 3H);  $^{13}\text{C}$  NMR (125 MHz,  $\text{CDCl}_3$ )  $\delta$  160.1, 158.0, 142.3, 128.6, 128.3, 125.7, 122.1, 104.9, 98.3, 74.7, 74.3, 55.5, 55.4, 45.4, 41.0, 37.6, 31.5, 12.7; IR (thin film) 3403, 2935, 2839, 1508, 1209, 1038  $\text{cm}^{-1}$ ; HRMS (ES/MeOH)  $m/z$  calcd for  $\text{C}_{22}\text{H}_{28}\text{NaO}_4$  ( $\text{M} + \text{Na}$ ) $^+$  379.1885, found 379.1882.

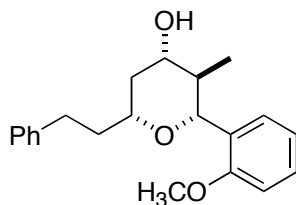

**2-(2-Methoxyphenyl)-3-methyl-6-phenethyltetrahydropyran-4-ol.** Pale yellow solid: mp 117–118 °C;  $[\alpha]_D^{25} = +57.5$  (*c* 0.50, CHCl<sub>3</sub>); <sup>1</sup>H NMR (500 MHz, CDCl<sub>3</sub>) δ 7.43 (d, *J* = 7.5 Hz, 1H), 7.27–7.24 (m, 3H), 7.18–7.15 (m, 3H), 7.00 (t, *J* = 7.5 Hz, 1H), 6.88 (d, *J* = 8.3 Hz, 1H), 4.54 (d, *J* = 10.1 Hz, 1H), 3.83 (s, 3H), 3.54–3.49 (m, 2H), 2.75–2.65 (m, 2H), 2.04 (ddd, *J* = 12.3, 4.6, 1.6 Hz, 1H), 1.98–1.91 (m, 1H), 1.78 (dddd, *J* = 13.9, 9.0, 7.2, 5.1 Hz, 1H), 1.56–1.54 (m, 1H), 1.53 (d, *J* = 5.4 Hz, 1H), 1.46 (ddd, *J* = 11.8, 11.4, 11.3 Hz, 1H), 0.78 (d, *J* = 6.6 Hz, 3H); <sup>13</sup>C NMR (125 MHz, CDCl<sub>3</sub>) δ 156.8, 142.3, 129.5, 128.6, 128.5, 128.3, 127.9, 125.7, 121.0, 110.5, 74.9, 74.3, 55.5, 45.6, 41.0, 37.6, 31.5, 12.6; IR (KBr) 3398, 2964, 2935, 1495, 1049, 754 cm<sup>-1</sup>; HRMS (ES/MeOH) *m/z* calcd for C<sub>21</sub>H<sub>26</sub>NaO<sub>3</sub> (M + Na)<sup>+</sup> 349.1780, found 349.1776.

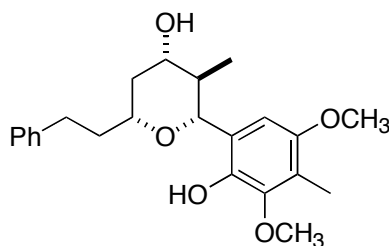

**2-(2-Hydroxy-3,5-dimethoxy-4-methylphenyl)-3-methyl-6-phenethyltetrahydropyran-4-ol.** Yellow oil:  $[\alpha]_D^{25} = +52.9$  (*c* 0.53, CHCl<sub>3</sub>); <sup>1</sup>H NMR (500 MHz, CDCl<sub>3</sub>) δ 7.28–7.25 (m, 2H), 7.19–7.15 (m, 3H), 6.67 (br s, 1H), 6.41 (s, 1H), 4.22 (d, *J* = 10.2 Hz, 1H), 3.82 (s, 3H), 3.77 (s, 3H), 3.56–3.51 (m, 1H), 3.48 (td, *J* = 10.2, 4.6 Hz, 1H), 2.79–2.66 (m, 2H), 2.15 (s, 3H), 2.08 (ddd, *J* = 12.3, 4.6, 1.6 Hz, 1H), 2.00–1.93 (m, 1H), 1.83 (dddd, *J* = 14.0, 9.6, 7.0, 4.8 Hz, 1H), 1.73 (m, 1H), 1.49 (ddd, *J* = 12.1, 11.5, 11.4 Hz, 1H), 0.86 (d, *J* = 6.6 Hz, 3H); <sup>13</sup>C NMR (125

MHz, CDCl<sub>3</sub>)  $\delta$  151.1, 146.8, 141.9, 141.8, 128.5, 128.4, 125.9, 122.6, 120.0, 105.8, 82.0, 75.4, 73.7, 60.6, 56.2, 44.0, 41.0, 37.6, 31.5, 30.4, 13.3, 9.2; IR (thin film) 3392, 3028, 2937, 1120, 739, 702 cm<sup>-1</sup>; HRMS (ES/MeOH)  $m/z$  calcd for C<sub>23</sub>H<sub>30</sub>NaO<sub>5</sub> (M + Na)<sup>+</sup> 409.1991, found 409.1978.

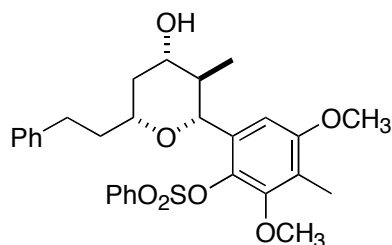

**Benzenesulfonic acid 6-(4-hydroxy-3-methyl-6-phenethyltetrahydropyran-2-yl)-2,4-dimethoxy-3-methylphenyl ester.** White solid: mp 58–60 °C;  $[\alpha]_D^{25} = +31.1$  (*c* 0.50, CHCl<sub>3</sub>); <sup>1</sup>H NMR (500 MHz, CDCl<sub>3</sub>)  $\delta$  8.02 (d, *J* = 7.3 Hz, 2H), 7.63 (app t, *J* = 7.5 Hz, 1H), 7.50 (t, *J* = 7.6 Hz, 2H), 7.30–7.26 (m, 2H), 7.22–7.17 (m, 3H), 6.71 (s, 1H), 4.20 (d, *J* = 10.1 Hz, 1H), 3.84 (s, 3H), 3.38–3.31 (m, 2H), 2.73 (s, 3H), 2.73–2.67 (m, 2H), 2.09 (s, 3H), 1.99 (ddd, *J* = 12.5, 4.8, 1.7 Hz, 1H), 1.96–1.90 (m, 1H), 1.79–1.72 (m, 1H), 1.59 (d, *J* = 5.0 Hz, 1H), 1.46–1.39 (m, 1H), 0.79 (d, *J* = 6.6 Hz, 3H); <sup>13</sup>C NMR (125 MHz, CDCl<sub>3</sub>)  $\delta$  157.1, 151.2, 142.2, 137.8, 135.7, 133.7, 132.7, 128.9, 128.7, 128.4, 128.3, 125.8, 121.0, 104.1, 74.9, 73.9, 60.3, 55.8, 45.0, 40.8, 37.5, 31.5, 12.7, 9.3; IR (KBr) 3401, 2937, 1456, 1176, 1130, 733 cm<sup>-1</sup>; HRMS (ES/MeOH)  $m/z$  calcd for C<sub>29</sub>H<sub>34</sub>NaO<sub>7</sub>S (M + Na)<sup>+</sup> 549.1923, found 549.1934.

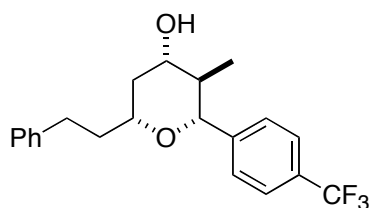

**3-Methyl-6-phenethyl-2-(4-trifluoromethylphenyl)tetrahydropyran-4-ol.** White solid: mp 99–100 °C;  $[\alpha]_D^{25} = +71.9$  (*c* 0.51, CHCl<sub>3</sub>); <sup>1</sup>H NMR (500 MHz, CDCl<sub>3</sub>)  $\delta$  7.61 (d, *J* = 8.0 Hz,

2H), 7.45 (d,  $J = 8.1$  Hz, 2H), 7.27–7.24 (m, 2H), 7.18–7.14 (m, 3H), 3.94 (d,  $J = 10.0$  Hz, 1H), 3.51–3.46 (m, 2H), 2.76–2.65 (m, 2H), 2.05 (ddd,  $J = 12.4, 4.6, 1.8$  Hz, 1H), 1.96 (dddd,  $J = 13.7, 8.8, 7.6, 5.9$  Hz, 1H), 1.82 (dddd,  $J = 13.9, 9.2, 7.0, 4.8$  Hz, 1H), 1.55–1.46 (m, 2H), 0.78 (d,  $J = 6.6$  Hz, 3H);  $^{13}\text{C}$  NMR (125 MHz,  $\text{CDCl}_3$ )  $\delta$  144.7, 142.0, 131.1 (q,  $^2J(\text{CF}) = 32.7$ ), 128.5, 128.4, 127.9, 125.9, 125.3, 125.3 (q,  $^3J(\text{CF}) = 3.8$ ), 83.9, 75.0, 73.8, 45.3, 41.0, 37.5, 31.5, 13.1; IR (KBr) 3369, 2933, 1325, 1122, 835, 700  $\text{cm}^{-1}$ ; HRMS (ES/MeOH)  $m/z$  calcd for  $\text{C}_{21}\text{H}_{23}\text{F}_3\text{NaO}_2$  ( $\text{M} + \text{Na}$ ) $^+$  387.1548, found 387.1552.

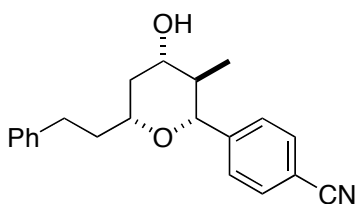

**4-(4-Hydroxy-3-methyl-6-phenethyltetrahydropyran-2-yl)benzonitrile.** Colorless oil:  $[\alpha]_{\text{D}}^{25} = +78.9$  ( $c$  0.92,  $\text{CHCl}_3$ );  $^1\text{H}$  NMR (500 MHz,  $\text{CDCl}_3$ )  $\delta$  7.65 (d,  $J = 8.1$  Hz, 2H), 7.44 (d,  $J = 8.2$  Hz, 2H), 7.27–7.24 (m, 2H), 7.19–7.13 (m, 3H), 3.94 (d,  $J = 10.0$  Hz, 1H), 3.52–3.46 (m, 2H), 2.76–2.64 (m, 2H), 2.04 (ddd,  $J = 12.4, 4.5, 1.6$  Hz, 1H), 1.99–1.92 (m, 1H), 1.82 (dddd,  $J = 13.9, 9.2, 7.0, 4.8$  Hz, 1H), 1.60 (d,  $J = 5.3$  Hz, 1H), 1.53–1.46 (m, 2H), 0.78 (d,  $J = 6.5$  Hz, 3H);  $^{13}\text{C}$  NMR (125 MHz,  $\text{CDCl}_3$ )  $\delta$  146.1, 141.8, 132.2, 128.44, 128.36, 128.3, 125.8, 118.8, 111.6, 83.7, 75.1, 73.5, 45.3, 40.9, 37.4, 31.4, 13.0; IR (thin film) 3460, 3028, 2922, 2229, 1610, 739  $\text{cm}^{-1}$ ; HRMS (ES/MeOH)  $m/z$  calcd for  $\text{C}_{21}\text{H}_{23}\text{NNaO}_2$  344.1627, found 344.1629.

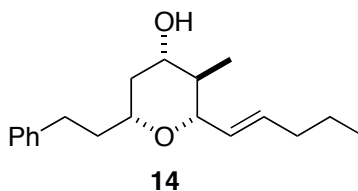

**3-Methyl-2-pent-1-enyl-6-phenethyltetrahydropyran-4-ol (14).** Light brown oil:  $[\alpha]_D^{25} = +40.0$  (*c* 0.53,  $\text{CHCl}_3$ );  $^1\text{H NMR}$  (500 MHz,  $\text{CDCl}_3$ )  $\delta$  7.28–7.26 (m, 2H), 7.19–7.17 (m, 3H), 5.72–5.67 (m, 1H), 5.43 (ddd,  $J = 15.3, 7.8, 1.4$  Hz, 1H), 3.36–3.33 (m, 3H), 2.78–2.66 (m, 2H), 2.10–2.01 (m, 2H), 1.98–1.90 (m, 2H), 1.73–1.70 (m, 2H), 1.47–1.39 (m, 2H), 1.36–1.23 (m, 2H), 0.93–0.90 (m, 6H);  $^{13}\text{C NMR}$  (125 MHz,  $\text{CDCl}_3$ )  $\delta$  142.1, 134.9, 129.2, 128.6, 128.4, 125.8, 82.8, 74.2, 73.8, 43.9, 40.9, 37.5, 34.5, 31.7, 22.3, 13.8, 13.4; IR (thin film) 3391, 3028, 2927, 1456, 1036, 746  $\text{cm}^{-1}$ ; HRMS (ES/MeOH)  $m/z$  calcd for  $\text{C}_{19}\text{H}_{28}\text{NaO}_2$  ( $\text{M} + \text{Na}$ ) $^+$  311.1987, found 311.1985.

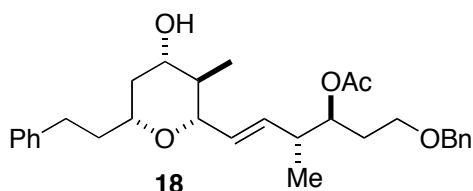

**Acetic acid 1-(2-benzyloxyethyl)-4-(4-hydroxy-3-methyl-6-phenethyltetrahydropyran-2-yl)-2-methylbut-3-enyl ester (18).** Yellow oil:  $[\alpha]_D^{25} = +8.8$  (*c* 0.53,  $\text{CHCl}_3$ );  $^1\text{H NMR}$  (500 MHz,  $\text{CDCl}_3$ ) mixture of *E* and *Z* isomers (ratio ca. 14:1):  $\delta$  7.34–7.25 (m, 7H), 7.34–7.25 (m, 3H), 5.65–5.57 (m, 1H), 5.49–5.42 (m, 1H), 5.06–4.98 (m, 1H), 4.47 (s, 2H), 3.51–3.45 (m, 2H), 3.35–3.32 (m, 3H), 2.75–2.69 (m, 2H), 2.45–2.69 (m, 1H), 2.00 (s, 3H), 1.96–1.78 (m, 4H), 1.76–1.69 (m, 1H), 1.60 (br s, 1H), 1.33–1.24 (m, 2H), 1.06–1.03 (m, 3H), 0.92–0.90 (m, 3H);  $^{13}\text{C NMR}$  (125 MHz,  $\text{CDCl}_3$ ) major isomer:  $\delta$  170.8, 142.1, 138.4, 135.0, 128.6, 128.41, 128.37, 127.8, 127.6, 125.8, 82.7, 74.2, 74.1, 73.7, 73.2, 67.0, 43.9, 41.0, 40.8, 37.6, 32.0, 31.7, 21.2,

16.2, 13.3; IR (thin film) 3446, 2933, 1732, 1242, 1095, 741  $\text{cm}^{-1}$ ; HRMS (ES/MeOH)  $m/z$  calcd for  $\text{C}_{30}\text{H}_{40}\text{NaO}_5$  ( $\text{M} + \text{Na}$ )<sup>+</sup> 503.2773, found 503.2776.

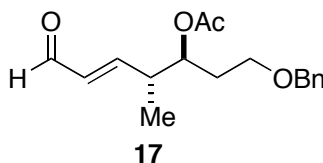

**Acetic acid 1-(2-benzyloxyethyl)-2-methyl-5-oxopent-3-enyl ester (17).** To a flame-dried flask equipped with a reflux condenser was added terminal alkene<sup>4</sup> (264.8 mg, 1.01 mmol, 1 equiv), crotonaldehyde (0.35 mL, 4.22 mmol, 4.2 equiv), Grubbs 2<sup>nd</sup> generation catalyst (70.0 mg, 0.08 mmol, 0.08 equiv) and dry  $\text{CH}_2\text{Cl}_2$  (4 mL). The mixture was heated at 50 °C for 30 min and then cooled to room temperature before 5 mL of  $\text{CH}_2\text{Cl}_2$  was added. The light brown mixture was heated at reflux (50 °C) for 18 h, cooled to room temperature, and concentrated *in vacuo*. Purification by flash chromatography (40% diethyl ether/hexanes) provided aldehyde **17** as a brown oil (150.4 mg, 54%, *E/Z* = 14:1).  $[\alpha]_{\text{D}}^{25} = +33.0$  ( $c$  0.29,  $\text{CHCl}_3$ );  $^1\text{H}$  NMR (500 MHz,  $\text{CDCl}_3$ ) *major isomer*:  $\delta$  9.51 (d,  $J = 7.8$  Hz, 1H), 7.35–7.27 (m, 5H), 6.77 (dd,  $J = 15.8, 8.2$  Hz, 1H), 6.12 (dd,  $J = 15.8, 7.8$  Hz, 1H), 5.17–5.14 (m, 1H), 4.47 (s, 2H), 3.52–3.43 (m, 2H), 2.79–2.70 (m, 1H), 2.01 (s, 3H), 1.84–1.82 (m, 2H), 1.12 (d,  $J = 6.8$  Hz, 3H); *minor isomer diagnostic peaks*:  $\delta$  9.99 (d,  $J = 8.0$  Hz, 1H);  $^{13}\text{C}$  NMR (125 MHz,  $\text{CDCl}_3$ ) *major isomer*:  $\delta$  193.9, 170.6, 158.2, 138.1, 133.6, 128.5, 127.9, 127.8, 73.4, 73.3, 66.4, 41.1, 32.2, 21.0, 15.6; *minor isomer diagnostic peaks*: 158.5, 133.2, 40.6, 31.6, 14.2; IR (thin film) 3032, 2864, 1734, 1684, 741, 700  $\text{cm}^{-1}$ ; HRMS (ES/MeOH)  $m/z$  calcd for  $\text{C}_{17}\text{H}_{22}\text{NaO}_4$  ( $\text{M} + \text{Na}$ )<sup>+</sup> 313.1416, found 313.1409.

<sup>4</sup> Izzo, I.; Maulucci, N.; Bifulco, G.; De Riccardis, F. *Angew. Chem. Int. Ed.* **2006**, *45*, 7557–7560.

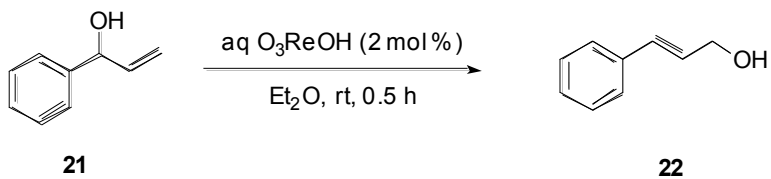

**Cinnamyl Alcohol (22):** To an oven-dried flask was added allylic alcohol **21** (67.6 mg, 0.50 mmol, 1 equiv) and 4 mL of Et<sub>2</sub>O (0.1 M) and the solution was cooled to 0 °C in an ice-water bath for 10 min. To this solution was added 65–70 % aq O<sub>3</sub>ReOH (2 μL, 0.011 mmol of O<sub>3</sub>ReOH, 2 mol %) via a syringe. The reaction mixture was stirred at 0 °C for 30 min and 30 μL of triethylamine was added. The reaction mixture was then warmed to room temperature and concentrated *in vacuo*. Purification by flash chromatography (30% diethyl ether/hexanes) furnished **22** as a colorless oil (60.1 mg, 89%).

<sup>1</sup>H spectrum

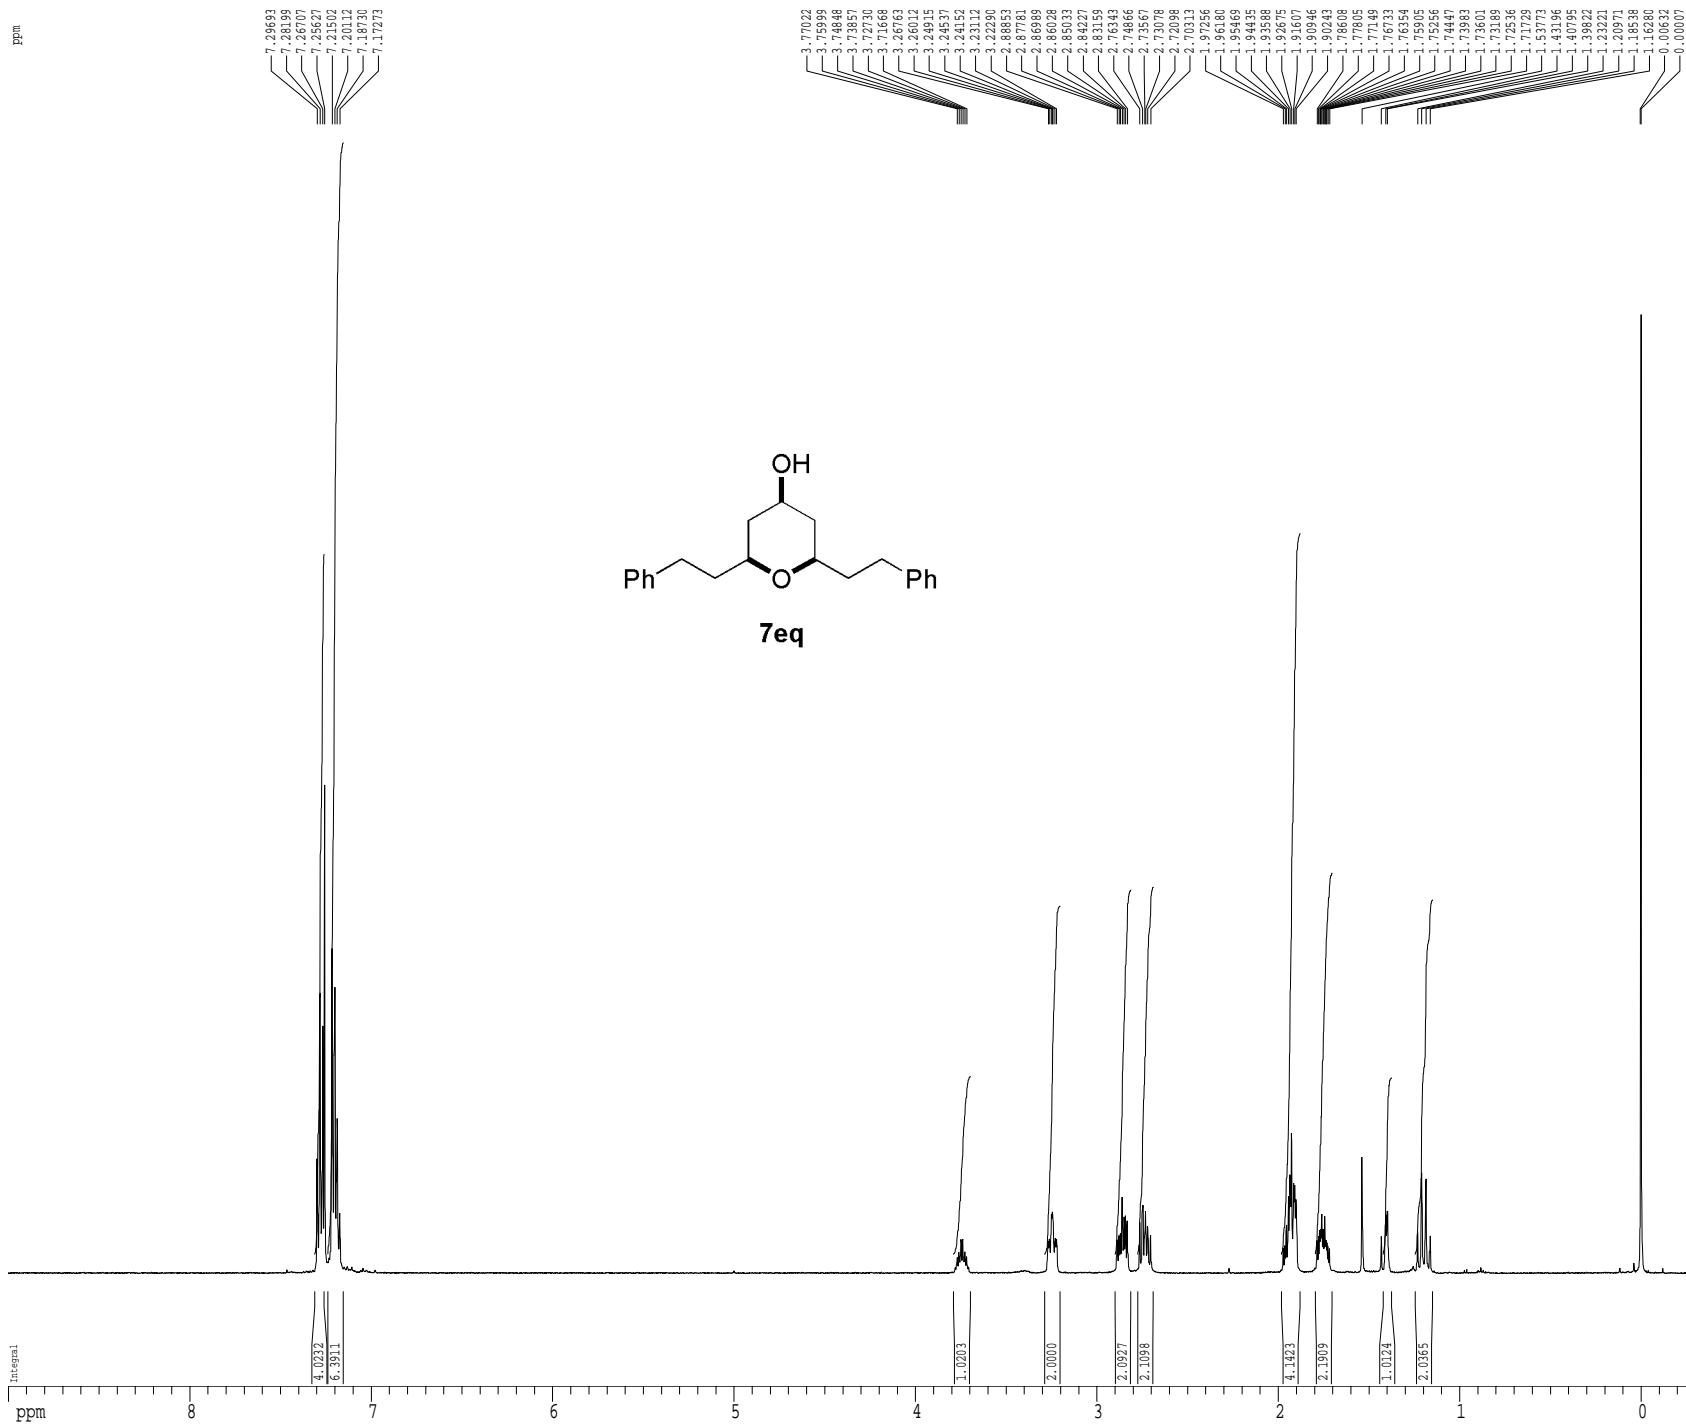

```

Current Data Parameters
USER      tadpet
NAME      KT-2-181B
EXPNO    1
PROCNO    1

F2 - Acquisition Parameters
Date_     20080109
Time      17.56
INSTRUM   gn500
PROBHD    5 mm broadband
PULPROG   zg30
TD         81728
SOLVENT   CDCl3T
NS         8
DS         2
SWH        8012.820 Hz
FIDRES     0.098043 Hz
AQ         5.0998774 sec
RG         1448.2
DW         62.400 usec
DE         6.00 usec
TE         298.0 K
DL         0.10000000 sec
MCREST    0.00000000 sec
MCWRX     0.01500000 sec

===== CHANNEL f1 =====
NUC1      1H
P1        12.00 usec
PL1       -3.00 dB
SF01      499.8284988 MHz

F2 - Processing parameters
SI         65536
SF         499.8250323 MHz
WDW        EM
SSB        0
LB         0.30 Hz
GB         0
PC         4.00

1D NMR plot parameters
CX         22.80 cm
CY         12.70 cm
F1P        9.000 ppm
F1         4498.43 Hz
F2P        -0.500 ppm
F2         -249.91 Hz
PPMCM      0.41667 ppm/cm
HZCM       208.26044 Hz/cm
    
```



<sup>13</sup>C spectrum with <sup>1</sup>H decoupling

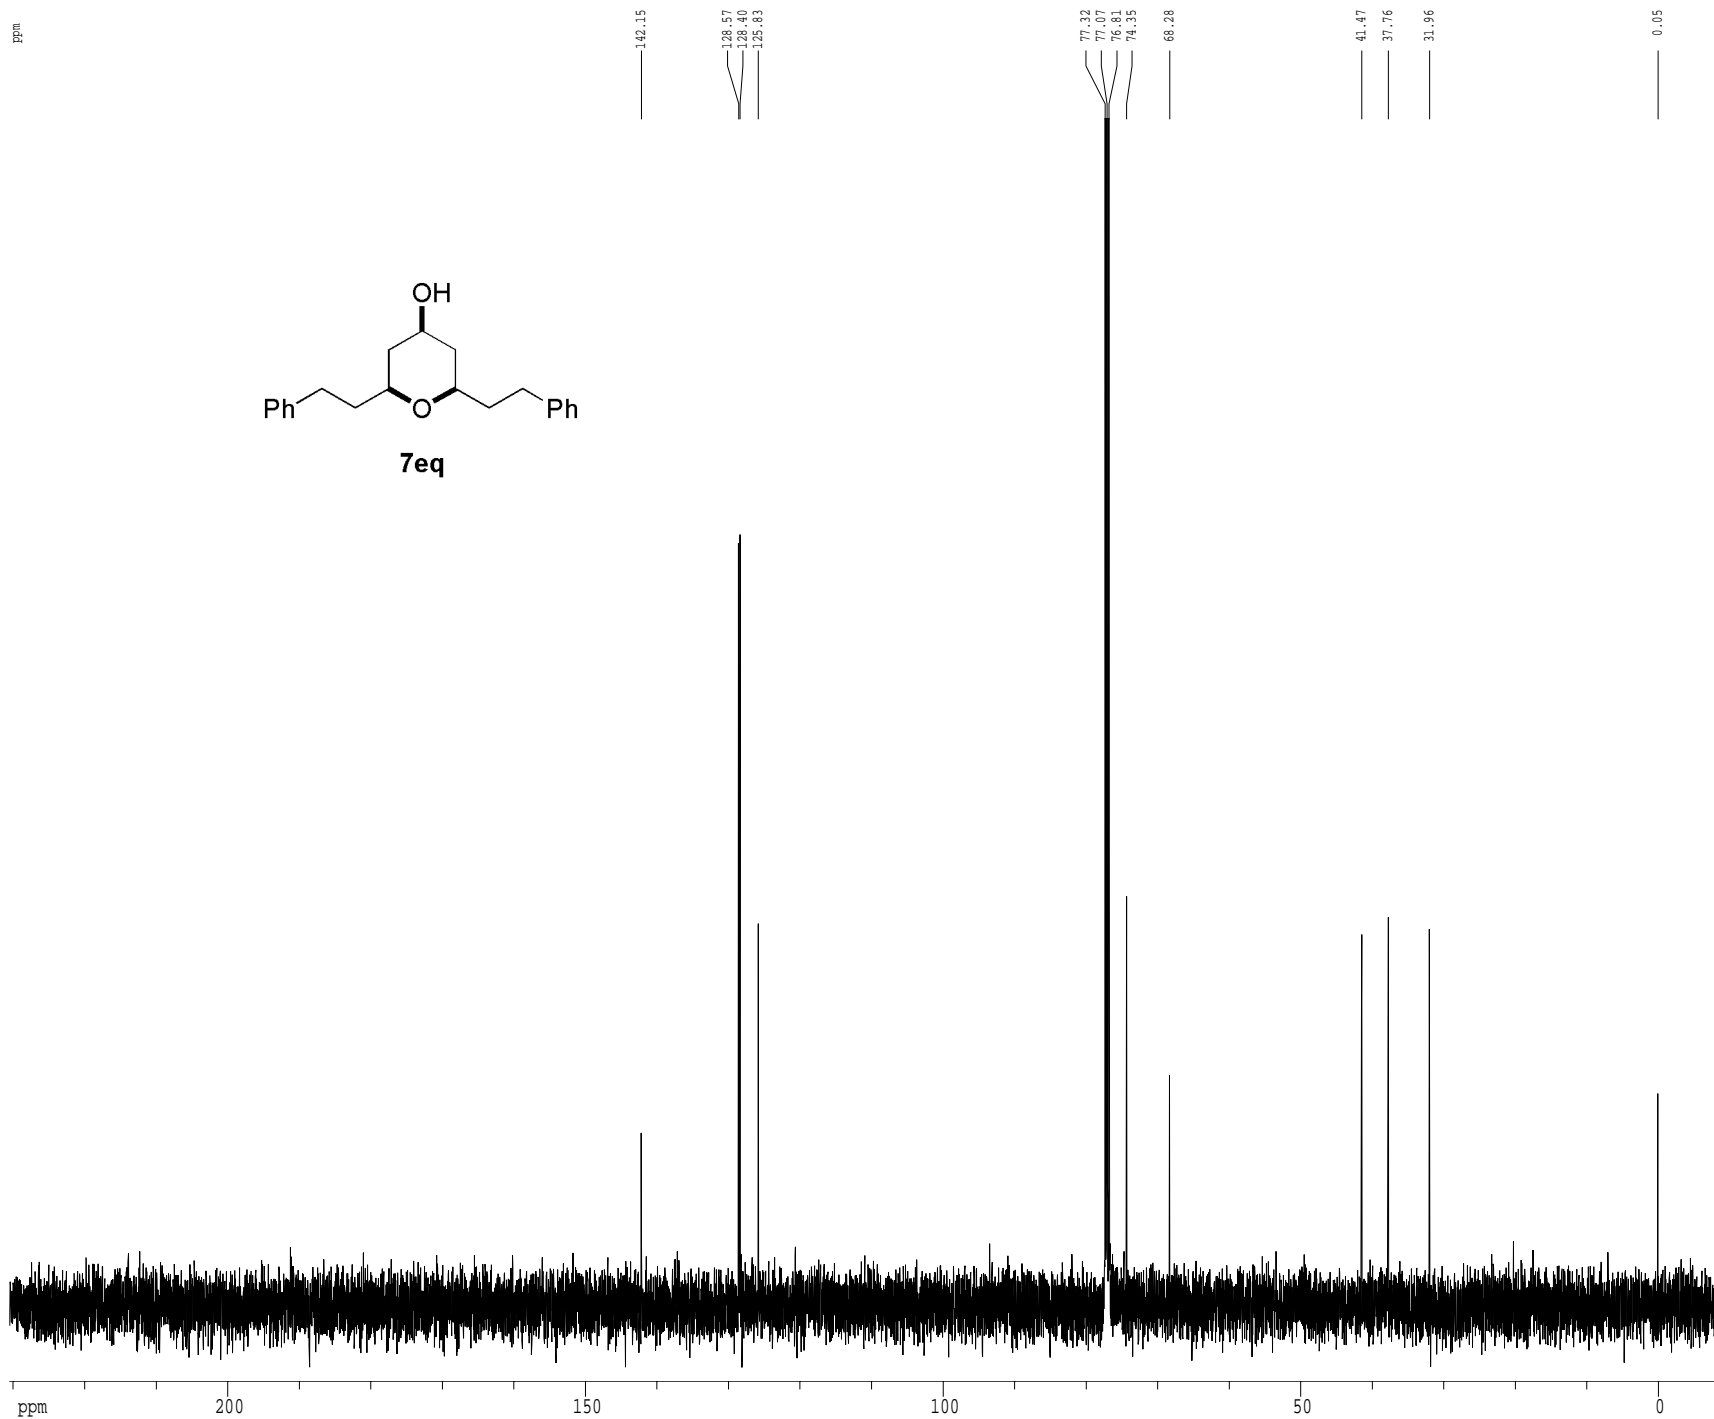

Current Data Parameters  
 USER tadpet  
 NAME KT-2-191B  
 EXPNO 2  
 PROCNO 1

F2 - Acquisition Parameters  
 Date\_ 20080127  
 Time 15.45  
 INSTRUM cryo500  
 PROBHD 5 mm CPTCI 1H-  
 PULPROG zgdc30  
 TD 65418  
 SOLVENT CDCl3  
 NS 141  
 DS 4  
 SWH 30303.031 Hz  
 FIDRES 0.463222 Hz  
 AQ 1.0794470 sec  
 RG 11585.2  
 DN 16.500 usec  
 DE 6.00 usec  
 TE 298.0 K  
 D1 0.25000000 sec  
 d11 0.03000000 sec  
 MCREST 0.00000000 sec  
 MCWREK 0.01500000 sec

===== CHANNEL f1 =====  
 NUC1 13C  
 P1 15.00 usec  
 PL1 -1.00 dB  
 SF01 125.7942548 MHz

===== CHANNEL f2 =====  
 CPDPRG2 waltz16  
 NUC2 1H  
 PCPD2 100.00 usec  
 PL2 1.60 dB  
 PL12 23.54 dB  
 SF02 500.2225011 MHz

F2 - Processing parameters  
 SI 65536  
 SF 125.7804190 MHz  
 WDW EM  
 SSB 0  
 LB 1.00 Hz  
 GB 0  
 PC 2.00

1D NMR plot parameters  
 CX 22.80 cm  
 CY 59.54 cm  
 F1P 230.637 ppm  
 F1 29009.68 Hz  
 F2P -10.287 ppm  
 F2 -1293.96 Hz  
 PPMCM 10.56688 ppm/cm  
 HZCM 1329.10706 Hz/cm

<sup>1</sup>H spectrum

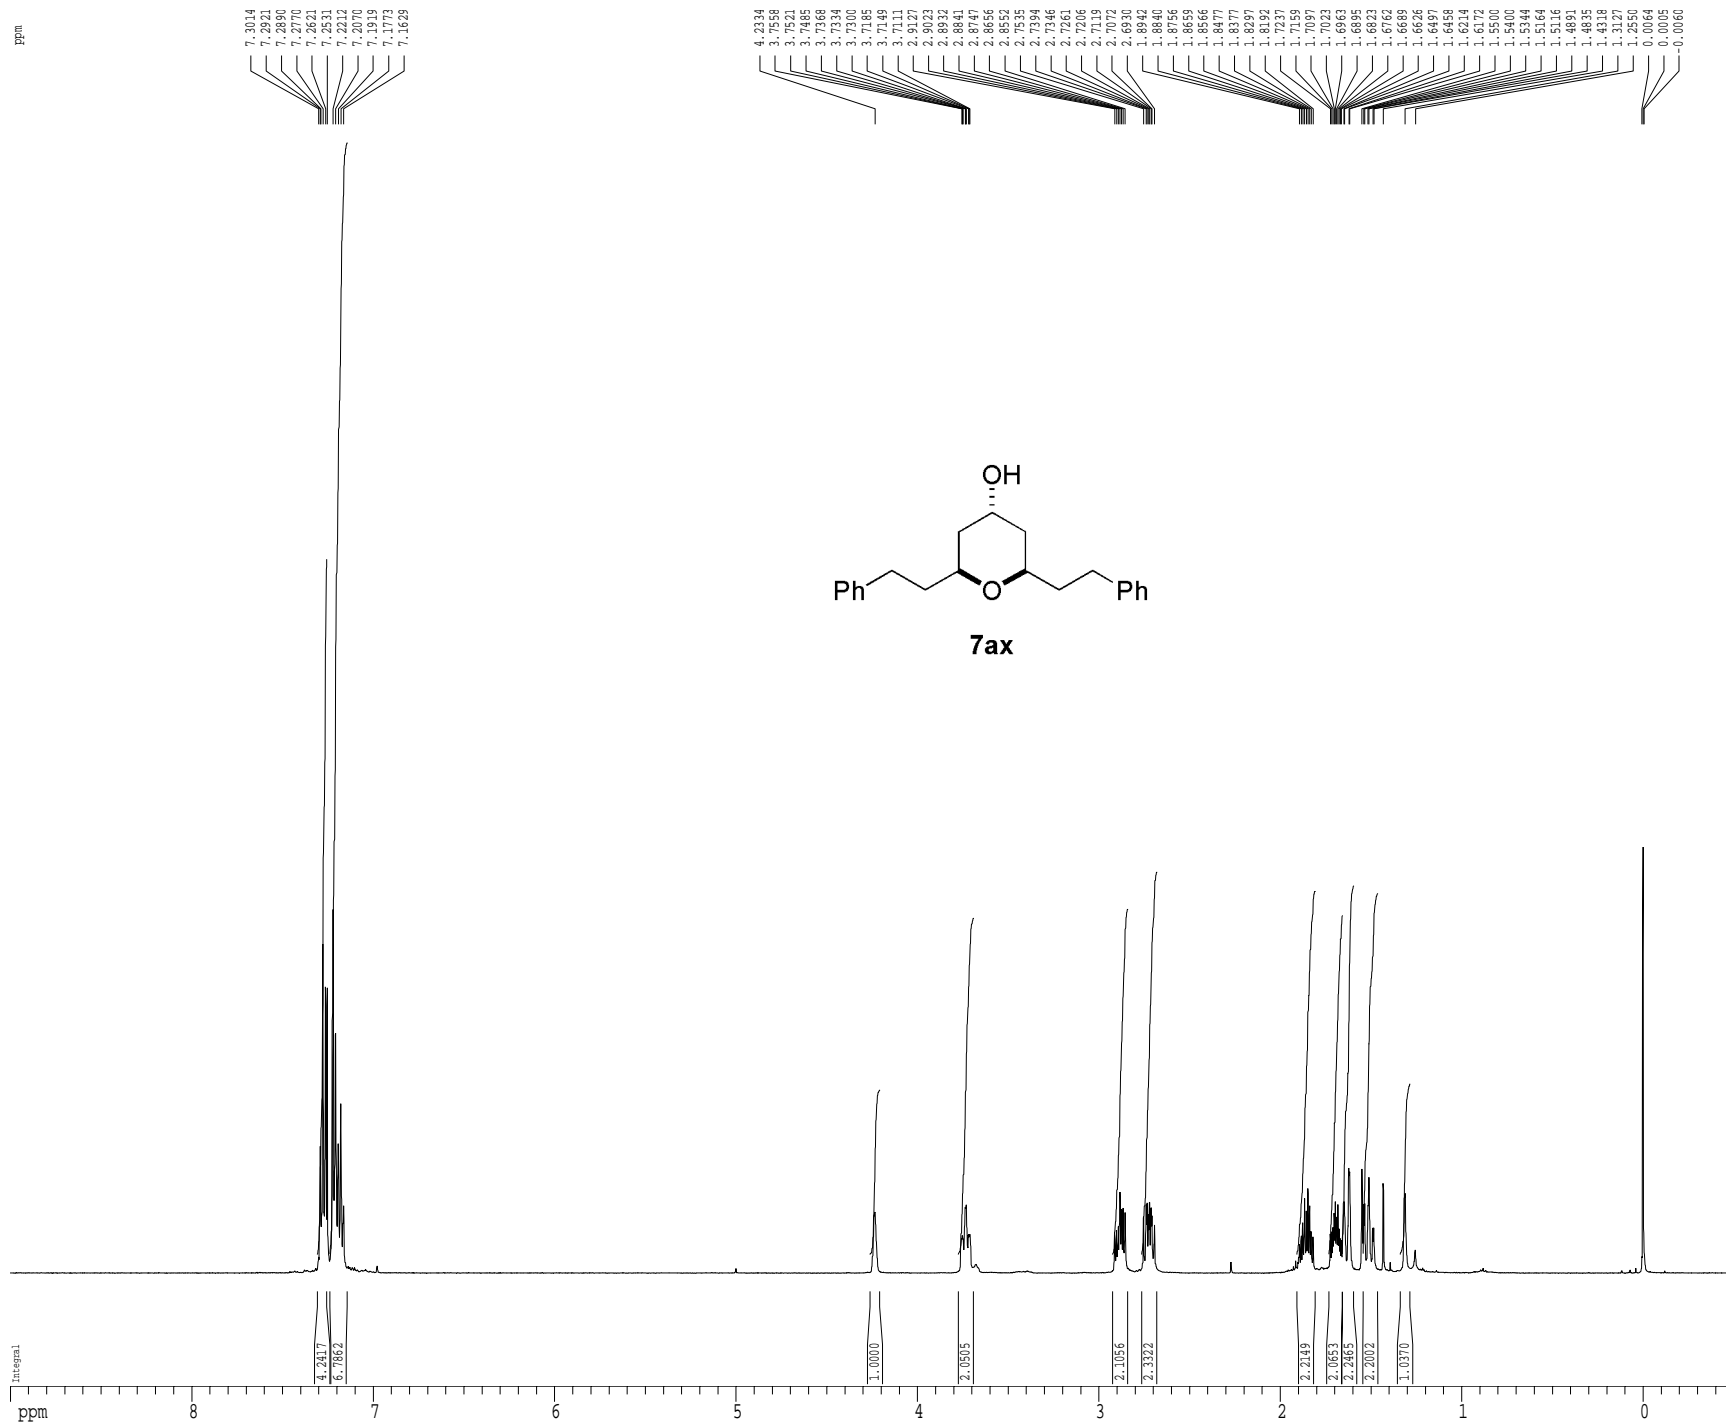

Current Data Parameters  
 USER tadpet  
 NAME KT-2-180A  
 EXPNO 1  
 PROCNO 1

F2 - Acquisition Parameters  
 Date\_ 20080111  
 Time 15.04  
 INSTRUM gn500  
 PROBHD 5 mm broadband  
 PULPROG zg30  
 TD 81728  
 SOLVENT CDCl3T  
 NS 8  
 DS 2  
 SWH 8012.820 Hz  
 FIDRES 0.098043 Hz  
 AQ 5.0998774 sec  
 RG 724.1  
 DW 62.400 usec  
 DE 6.00 usec  
 TE 298.0 K  
 DL 0.10000000 sec  
 MCREST 0.00000000 sec  
 MCWRR 0.01500000 sec

===== CHANNEL f1 =====  
 NUC1 1H  
 P1 12.00 usec  
 PL1 -3.00 dB  
 SF01 499.8284988 MHz

F2 - Processing parameters  
 SI 65536  
 SF 499.8250341 MHz  
 WDW EM  
 SSB 0  
 LB 0.30 Hz  
 GB 0  
 PC 4.00

1D NMR plot parameters  
 CX 22.80 cm  
 CY 5.64 cm  
 F1P 9.000 ppm  
 F1 4498.43 Hz  
 F2P -0.500 ppm  
 F2 -249.91 Hz  
 PPMCM 0.41667 ppm/cm  
 HZCM 208.26044 Hz/cm

13C spectrum with 1H decoupling

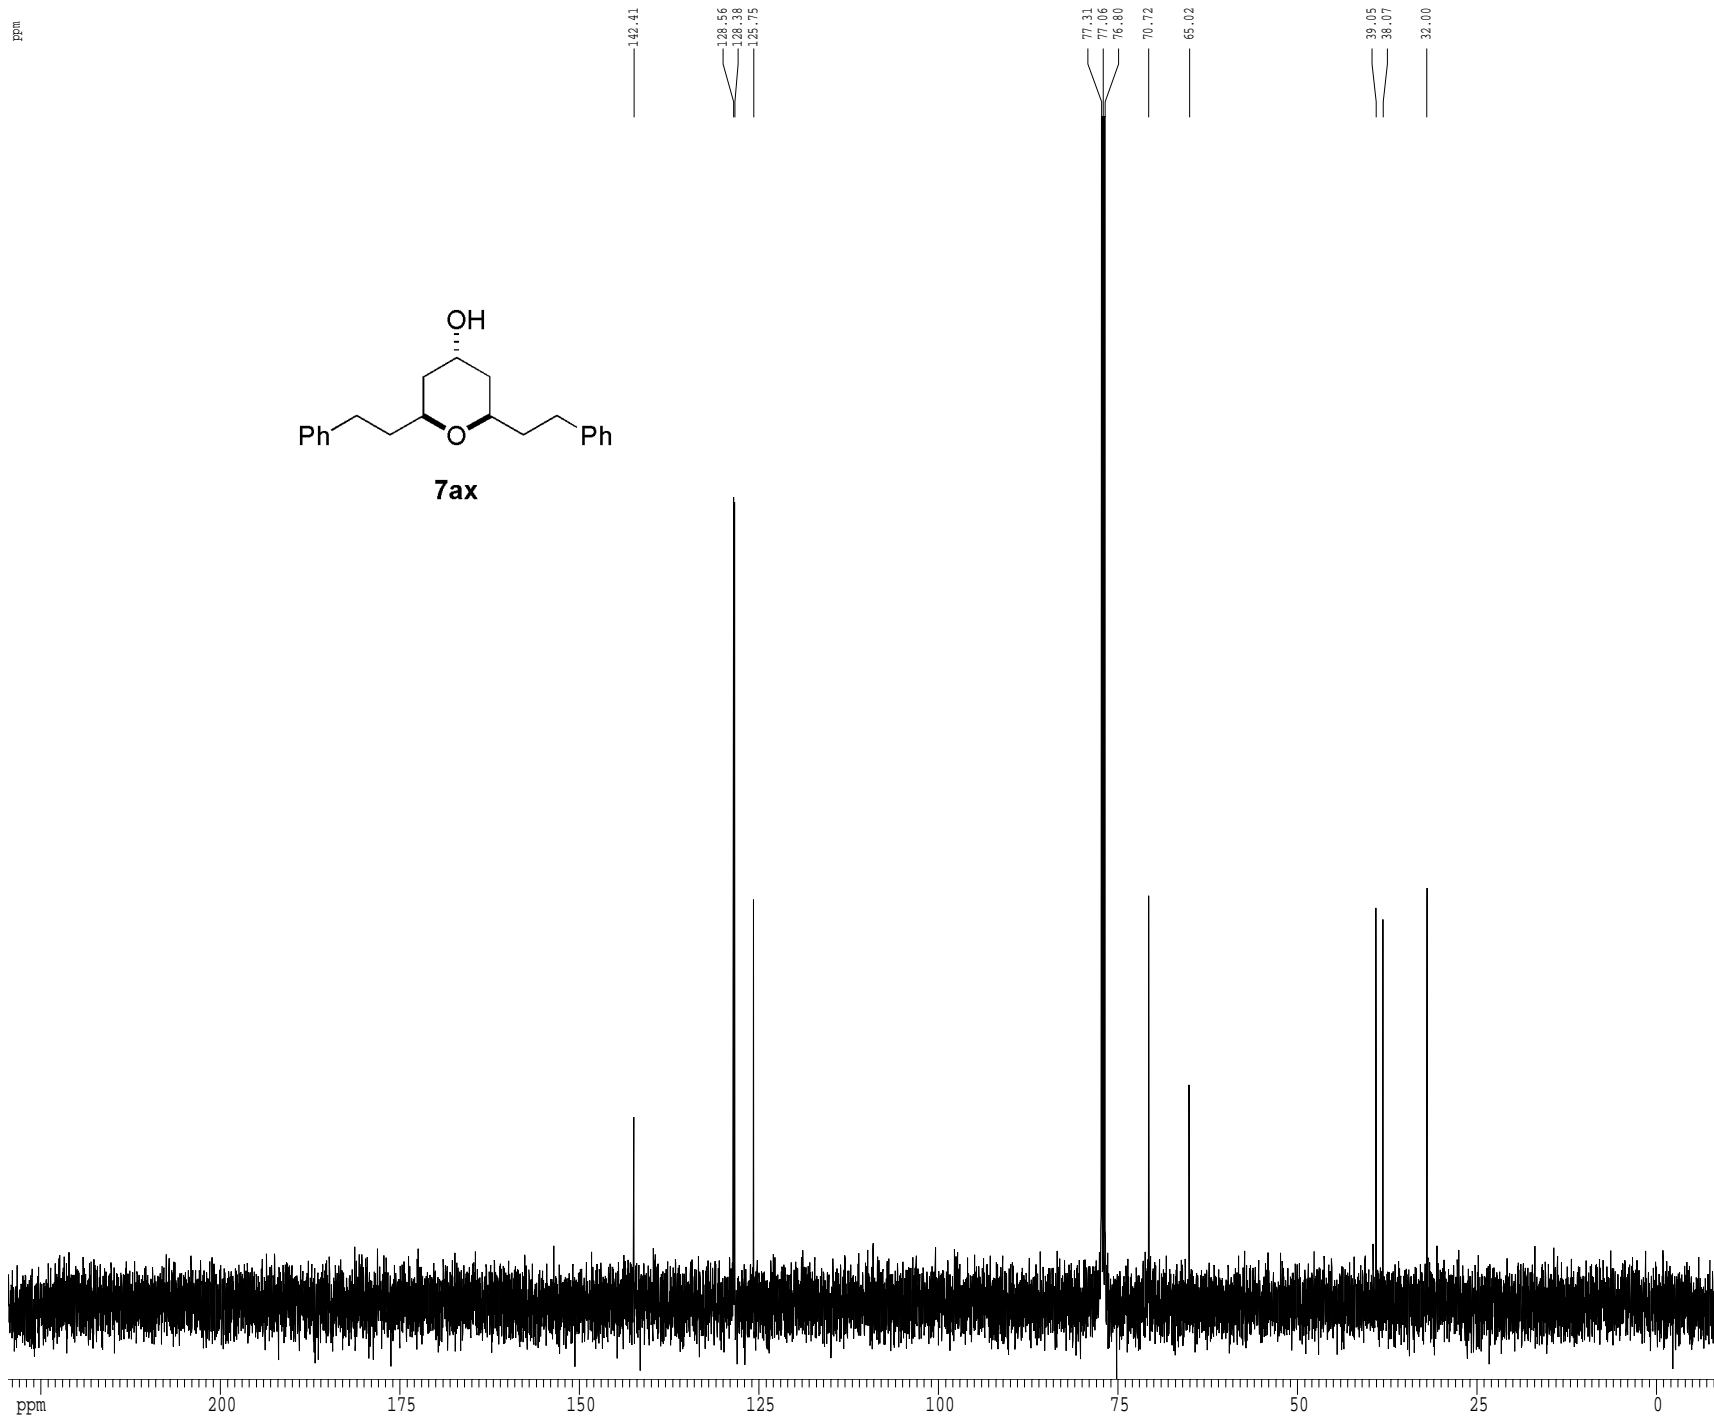

Current Data Parameters  
 USER tadpet  
 NAME KT-2-1578A  
 EXPNO 2  
 PROCNO 1

F2 - Acquisition Parameters  
 Date\_ 20071207  
 Time 18.28  
 INSTRUM gm500  
 PROBHD 5 mm broadband  
 PULPROG zgdc30  
 TD 65536  
 SOLVENT CDC13  
 NS 131  
 DS 4  
 SWH 30303.031 Hz  
 FIDRES 0.462388 Hz  
 AQ 1.0813940 sec  
 RG 7298.2  
 DN 16.500 usec  
 DE 4.50 usec  
 TE 298.0 K  
 D1 0.25000000 sec  
 d11 0.03000000 sec  
 MCREST 0.00000000 sec  
 MCWREK 0.01500000 sec

===== CHANNEL f1 =====  
 NUC1 13C  
 P1 7.08 usec  
 PL1 0.00 dB  
 SF01 125.6949209 MHz

===== CHANNEL f2 =====  
 CPDPRG2 waltz16  
 NUC2 1H  
 PCPD2 80.00 usec  
 PL2 -3.00 dB  
 PL12 14.70 dB  
 SF02 499.8274991 MHz

F2 - Processing parameters  
 SI 65536  
 SF 125.6810960 MHz  
 WDW EM  
 SSB 0  
 LB 1.00 Hz  
 GB 0  
 PC 2.00

ID NMR plot parameters  
 CX 22.80 cm  
 CY 22.10 cm  
 F1P 229.520 ppm  
 F1 28846.29 Hz  
 F2P -10.507 ppm  
 F2 -1320.48 Hz  
 PPMCM 10.52747 ppm/cm  
 HZCM 1323.10376 Hz/cm

## 1H spectrum

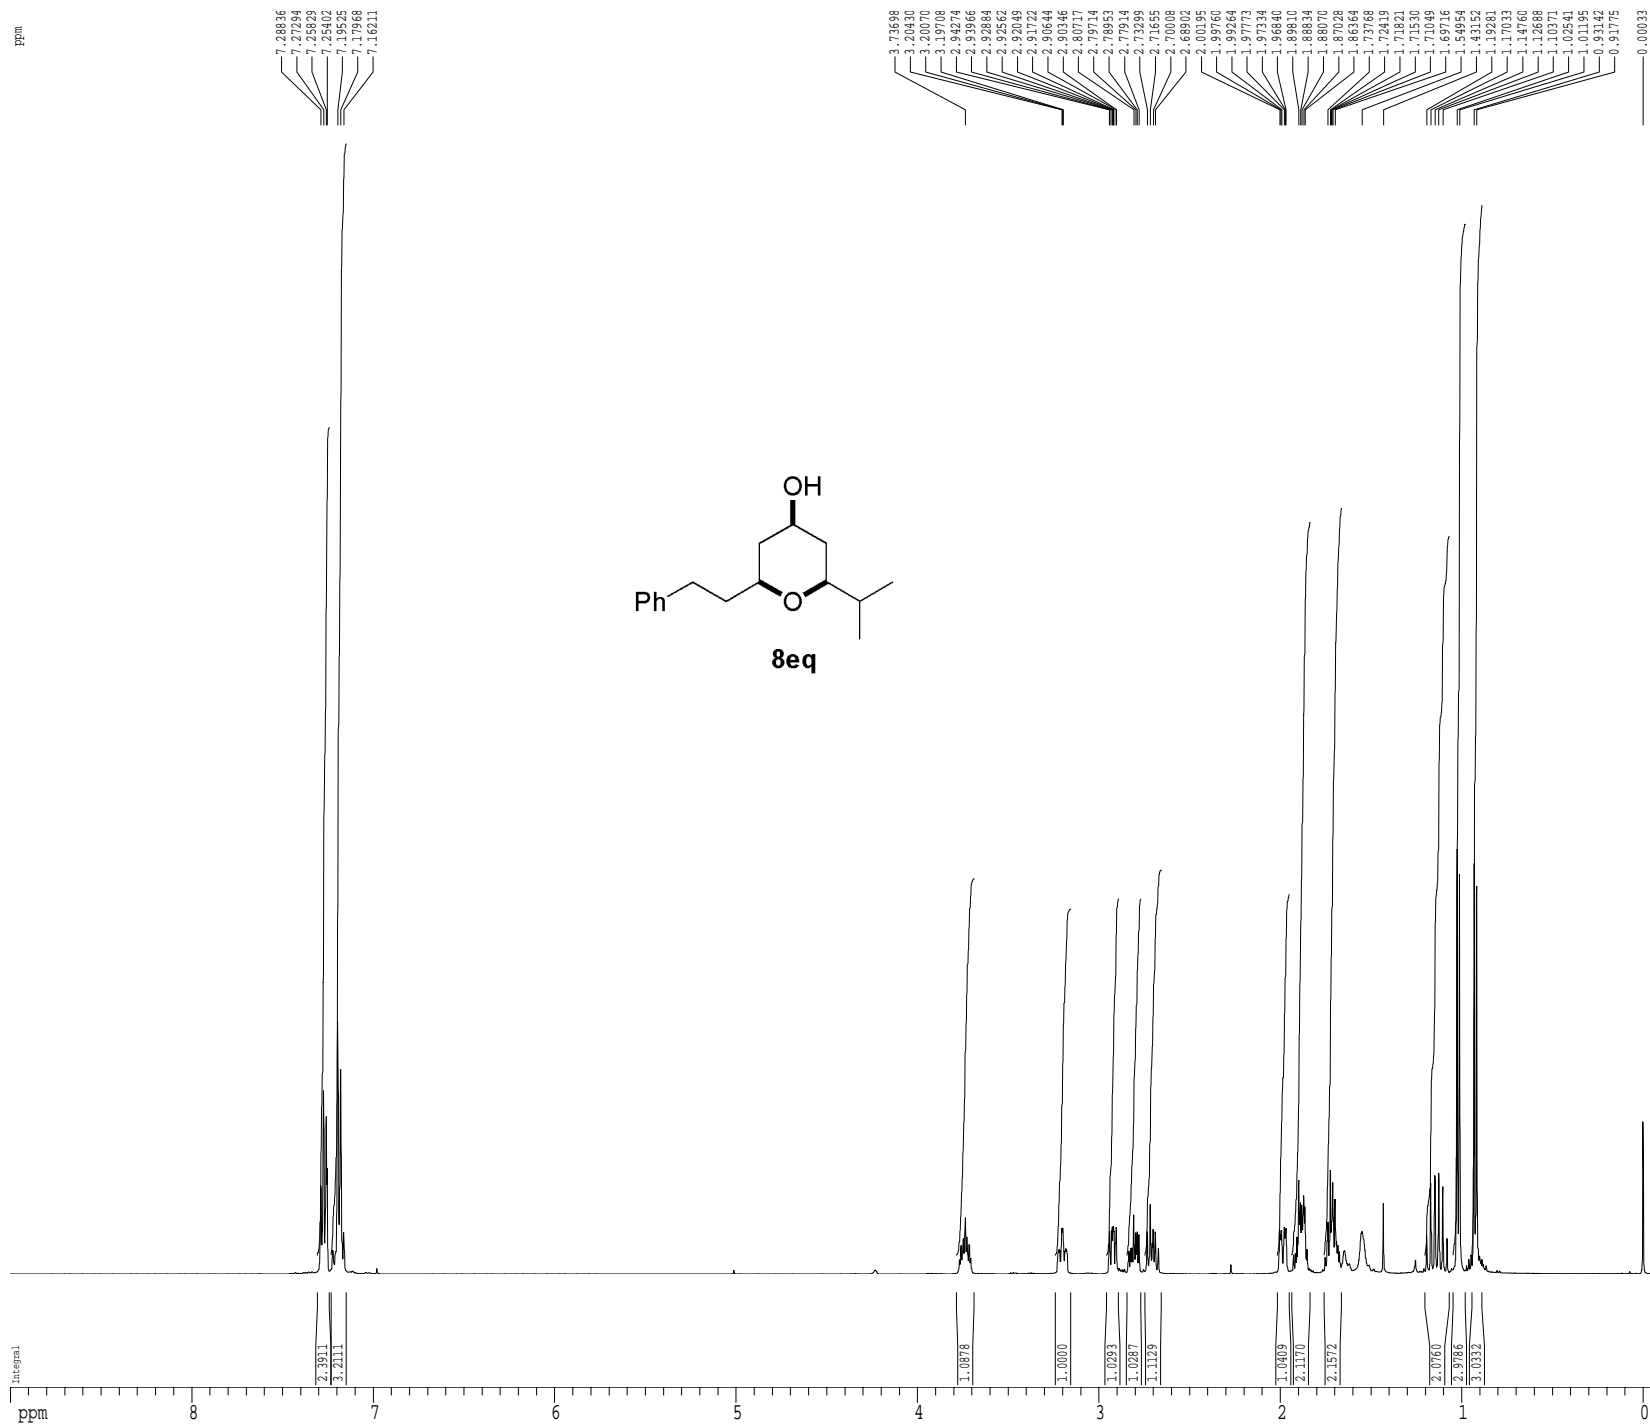

Current Data Parameters  
 USER tadpet  
 NAME KT-2-270D  
 EXPNO 1  
 PROCNO 1

F2 - Acquisition Parameters  
 Date\_ 20080518  
 Time 19.04  
 INSTRUM cryo500  
 PROBHD 5 mm CPTCI 1H-  
 PULPROG zg30  
 TD 81728  
 SOLVENT CDCl3T  
 NS 8  
 DS 2  
 SWH 8012.820 Hz  
 FIDRES 0.098043 Hz  
 AQ 5.0998774 sec  
 RG 5  
 DW 62.400 usec  
 DE 6.00 usec  
 TE 298.0 K  
 DL 0.10000000 sec  
 MCREST 0.00000000 sec  
 MCWEX 0.01500000 sec

===== CHANNEL f1 =====  
 NUC1 1H  
 P1 7.38 usec  
 PL1 1.60 dB  
 SF01 500.2235015 MHz

F2 - Processing parameters  
 SI 65536  
 SF 500.2200343 MHz  
 WDW EM  
 SSB 0  
 LB 0.30 Hz  
 GB 0  
 PC 4.00

1D NMR plot parameters  
 CX 22.80 cm  
 CY 5.62 cm  
 F1P 9.000 ppm  
 F1 4501.98 Hz  
 F2P -0.500 ppm  
 F2 -250.11 Hz  
 PPMCM 0.41667 ppm/cm  
 HZCM 208.42502 Hz/cm

<sup>13</sup>C spectrum with <sup>1</sup>H decoupling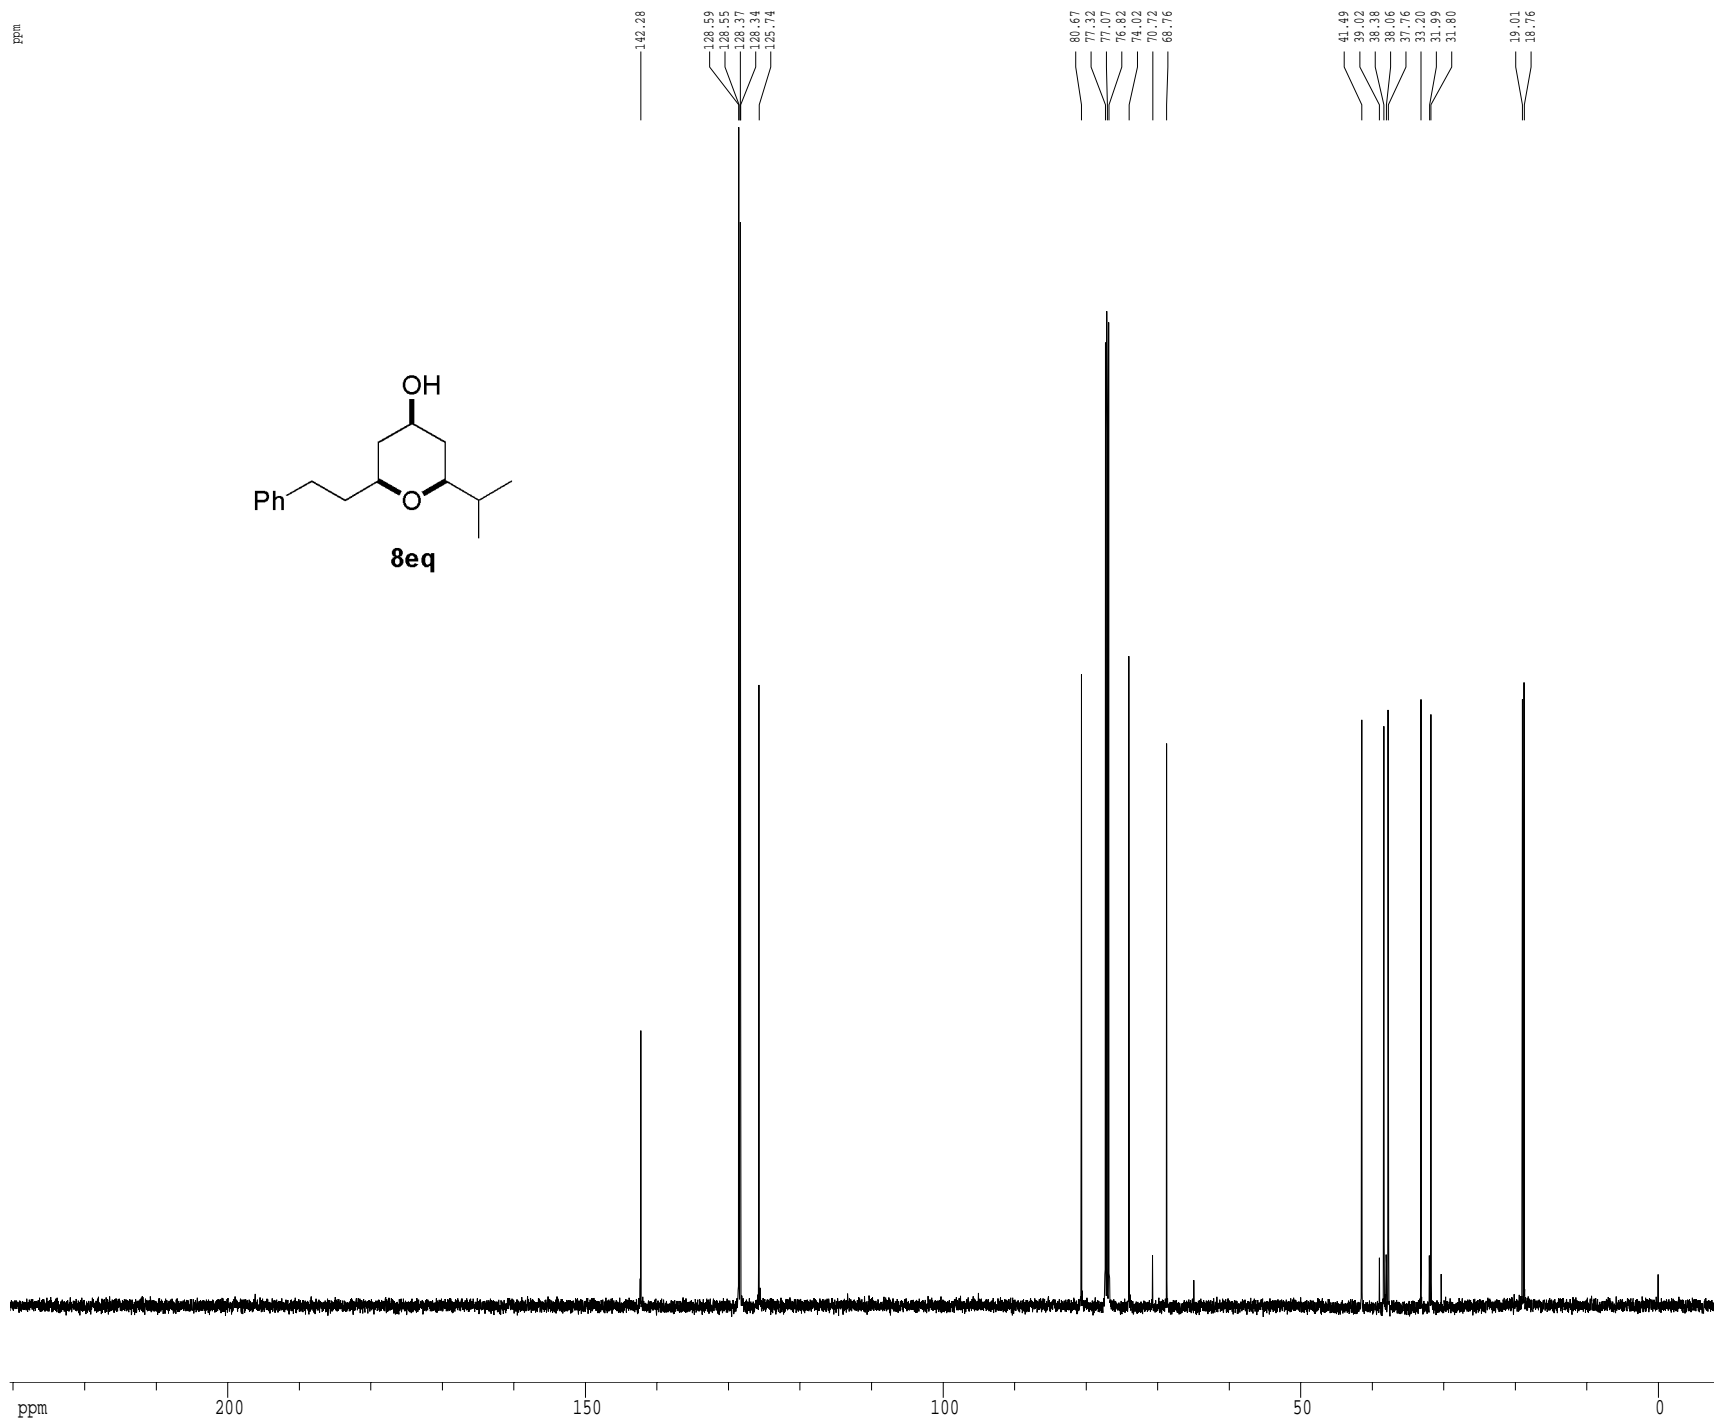

Current Data Parameters  
 USER tadpet  
 NAME KT-2-270D  
 EXPNO 2  
 PROCNO 1

F2 - Acquisition Parameters  
 Date\_ 20080518  
 Time 19.09  
 INSTRUM cryo500  
 PROBHD 5 mm CPTCI 1H-  
 PULPROG zgdc30  
 TD 65418  
 SOLVENT CDC13  
 NS 171  
 DS 4  
 SWH 30303.031 Hz  
 FIDRES 0.463222 Hz  
 AQ 1.0794470 sec  
 RG 13004  
 DN 16.500 usec  
 DE 6.00 usec  
 TE 298.0 K  
 D1 0.25000000 sec  
 d11 0.03000000 sec  
 MCREST 0.00000000 sec  
 MCWREX 0.01500000 sec

===== CHANNEL f1 =====  
 NUC1 13C  
 P1 14.75 usec  
 PL1 -1.00 dB  
 SF01 125.7942548 MHz

===== CHANNEL f2 =====  
 CPDPRG2 waltz16  
 NUC2 1H  
 PCPD2 100.00 usec  
 PL2 1.60 dB  
 PL12 24.80 dB  
 SF02 500.2225011 MHz

F2 - Processing parameters  
 SI 65536  
 SF 125.7804217 MHz  
 WDW EM  
 SSB 0  
 LB 1.00 Hz  
 GB 0  
 PC 2.00

ID NMR plot parameters  
 CX 22.80 cm  
 CY 15.65 cm  
 F1P 230.637 ppm  
 F1 29009.68 Hz  
 F2P -10.287 ppm  
 F2 -1293.96 Hz  
 PPMCM 10.56688 ppm/cm  
 HZCM 1329.10706 Hz/cm

<sup>1</sup>H spectrum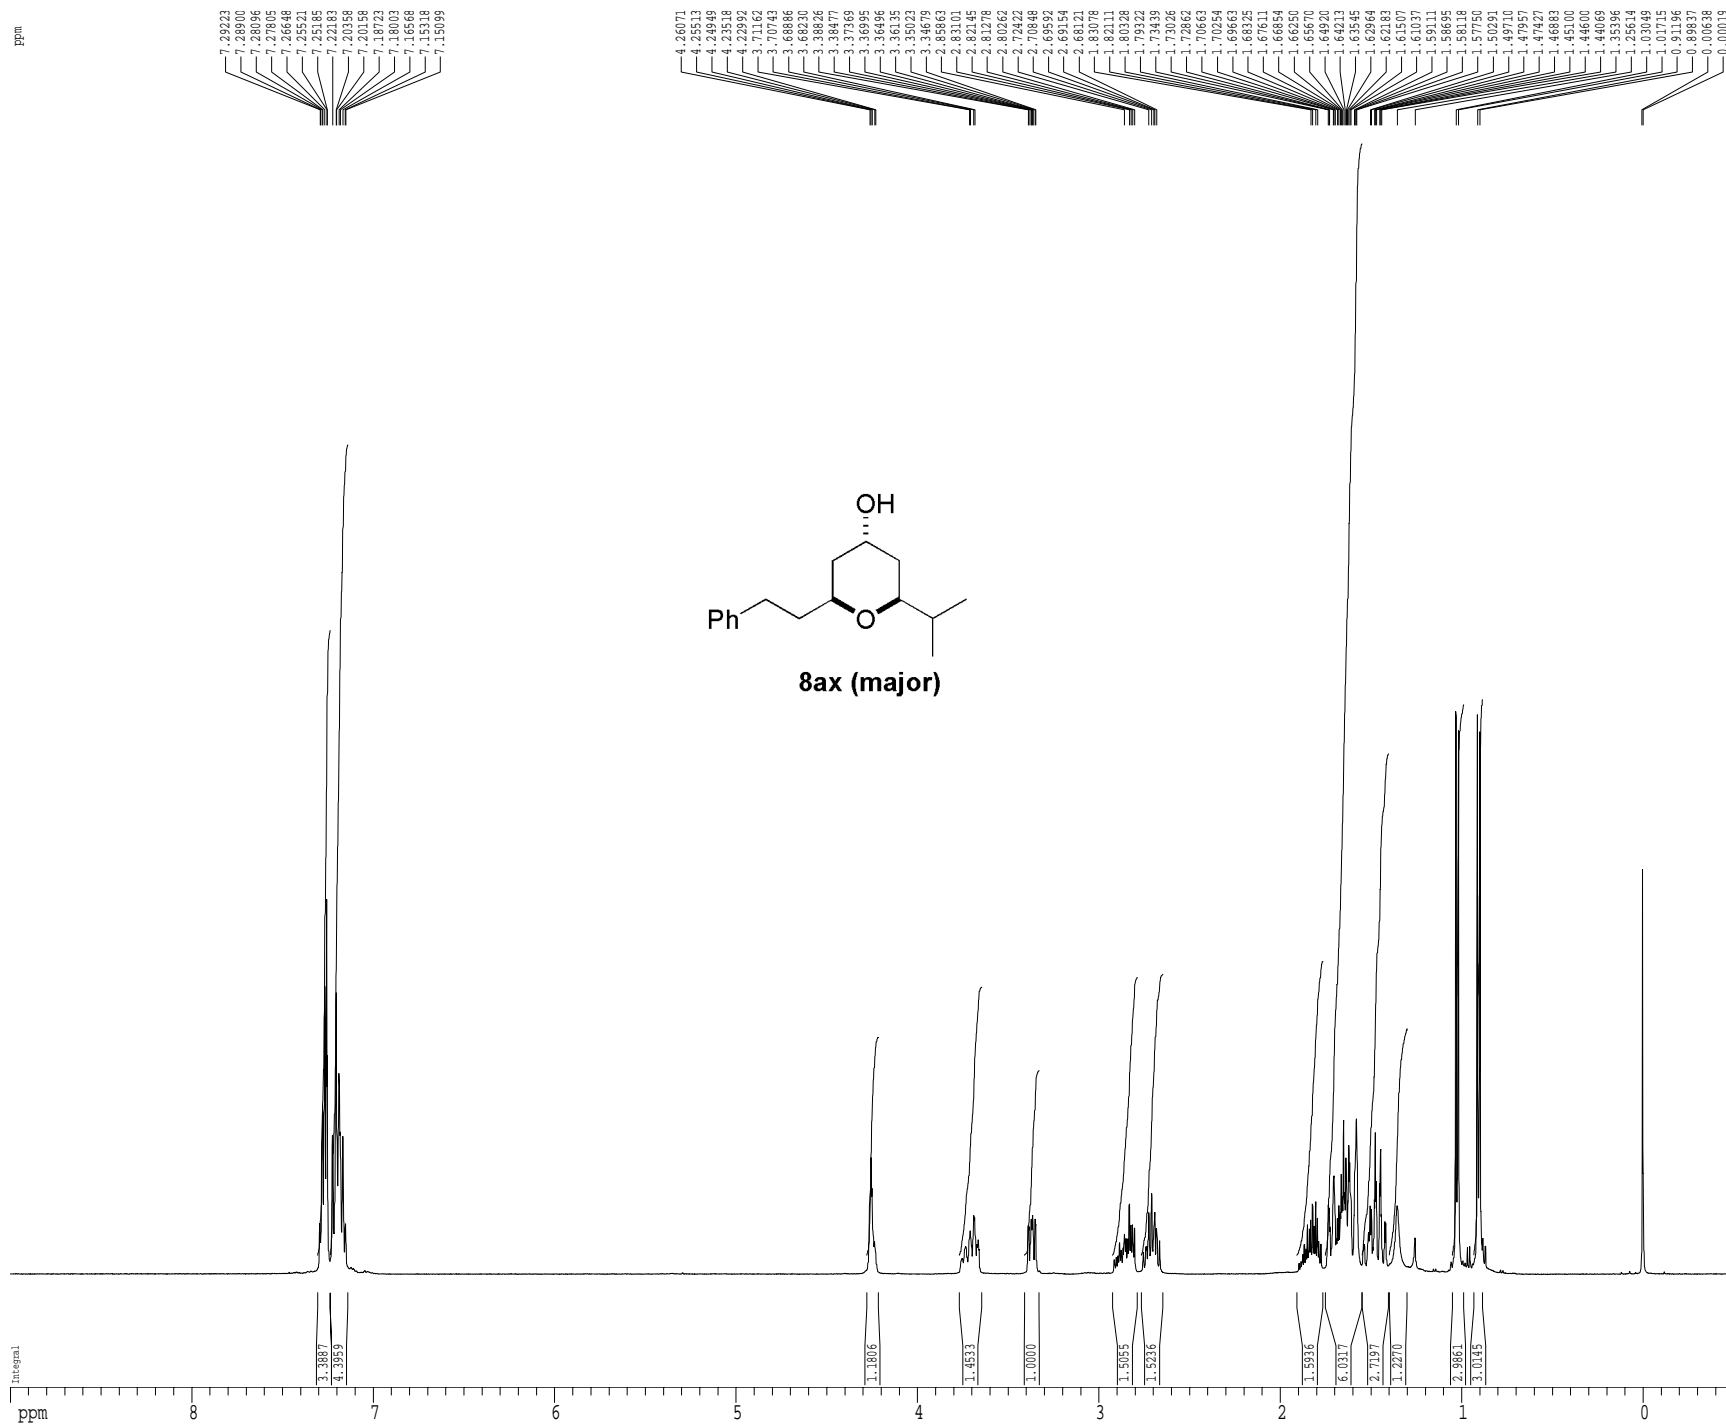

Current Data Parameters  
 USER tadpet  
 NAME KT-2-270BC1A  
 EXPNO 1  
 PROCNO 1

F2 - Acquisition Parameters  
 Date\_ 20080812  
 Time 15.04  
 INSTRUM gn500  
 PROBHD 5 mm broadband  
 PULPROG zg30  
 TD 81728  
 SOLVENT CDCl3T  
 NS 8  
 DS 2  
 SWH 8012.820 Hz  
 FIDRES 0.098043 Hz  
 AQ 5.0998774 sec  
 RG 143.7  
 DW 62.400 usec  
 DE 6.00 usec  
 TE 298.0 K  
 DL 0.10000000 sec  
 MCREST 0.00000000 sec  
 MCWEX 0.01500000 sec

===== CHANNEL f1 =====  
 NUC1 1H  
 P1 12.00 usec  
 PL1 -3.00 dB  
 SF01 499.7234980 MHz

F2 - Processing parameters  
 SI 65536  
 SF 499.7200335 MHz  
 WDW EM  
 SSB 0  
 LB 0.30 Hz  
 GB 0  
 PC 1.00

1D NMR plot parameters  
 CX 22.80 cm  
 CY 7.45 cm  
 F1P 9.000 ppm  
 F1 4497.48 Hz  
 F2P -0.500 ppm  
 F2 -249.86 Hz  
 PPMCM 0.41667 ppm/cm  
 HZCM 208.21669 Hz/cm

13C spectrum with 1H decoupling

ppm

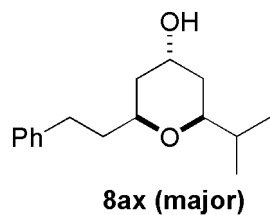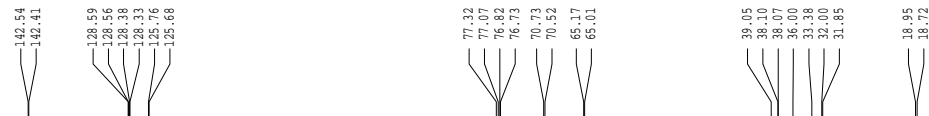

Current Data Parameters  
 USER tadpet  
 NAME KT-2-270BC1A  
 EXPNO 2  
 PROCNO 1

F2 - Acquisition Parameters  
 Date\_ 20080812  
 Time 15.12  
 INSTRUM gm500  
 PROBHD 5 mm broadband  
 PULPROG zgdc30  
 TD 65536  
 SOLVENT CDC13  
 NS 311  
 DS 4  
 SWH 30303.031 Hz  
 FIDRES 0.462388 Hz  
 AQ 1.0813940 sec  
 RG 6502  
 DN 16.500 usec  
 DE 4.50 usec  
 TE 298.0 K  
 D1 0.25000000 sec  
 d11 0.03000000 sec  
 MCREST 0.00000000 sec  
 MCWREK 0.01500000 sec

===== CHANNEL f1 =====  
 NUC1 13C  
 P1 7.08 usec  
 PL1 0.00 dB  
 SF01 125.6685160 MHz

===== CHANNEL f2 =====  
 CPDPRG2 waltz16  
 NUC2 1H  
 PCPD2 80.00 usec  
 PL2 -3.00 dB  
 PL12 14.70 dB  
 SF02 499.7224986 MHz

F2 - Processing parameters  
 SI 65536  
 SF 125.6546934 MHz  
 WDW EM  
 SSB 0  
 LB 1.00 Hz  
 GB 0  
 PC 2.00

ID NMR plot parameters  
 CX 22.80 cm  
 CY 15.65 cm  
 F1P 229.520 ppm  
 F1 28840.22 Hz  
 F2P -10.507 ppm  
 F2 -1320.20 Hz  
 PPMCM 10.52747 ppm/cm  
 HZCM 1322.82581 Hz/cm

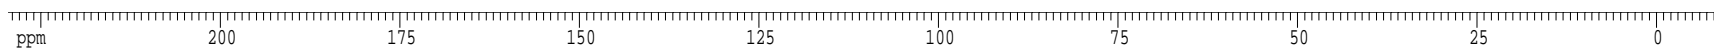

## 1H spectrum

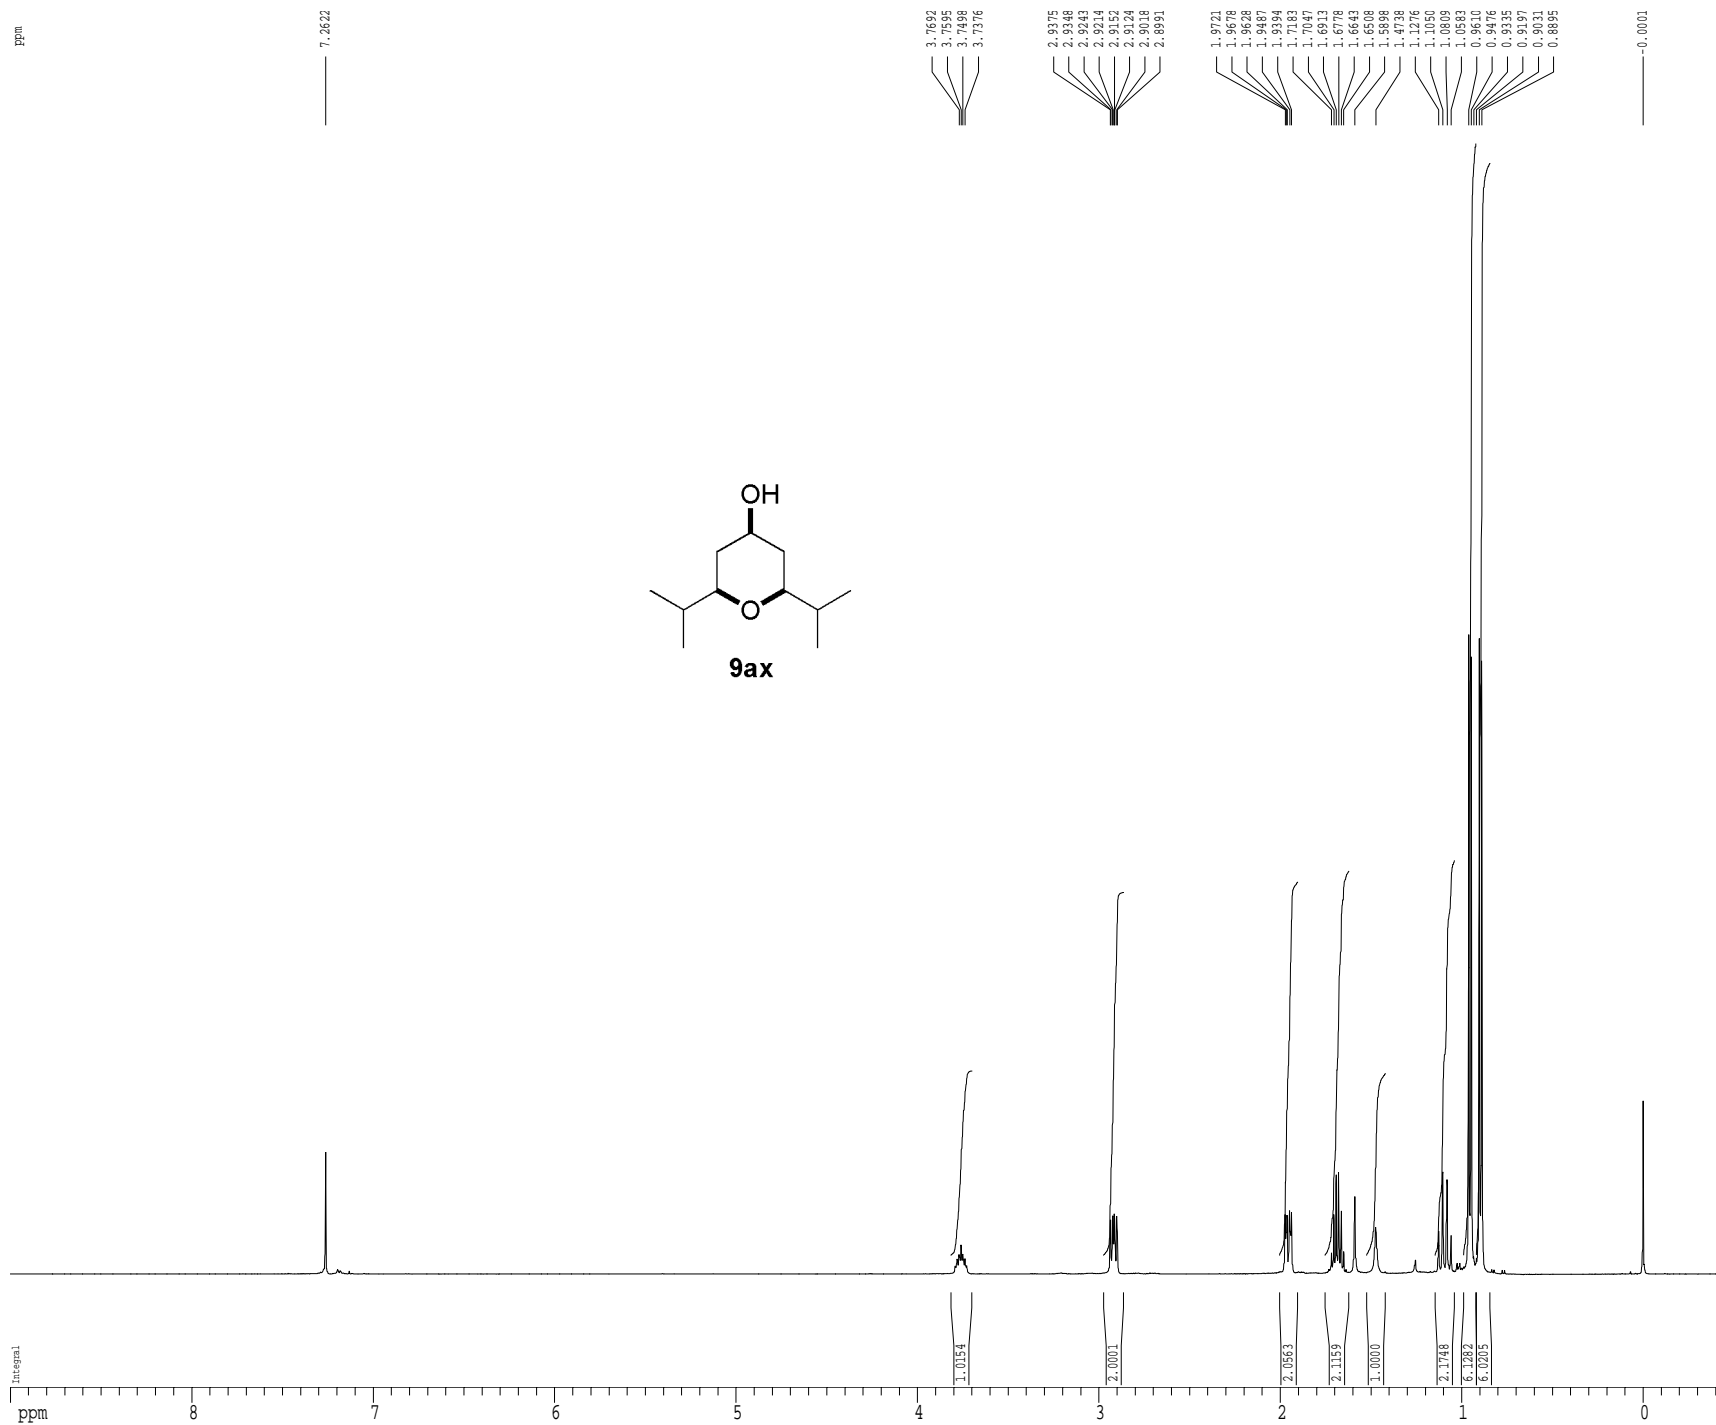

Current Data Parameters  
 USER tadpet  
 NAME KT-2-270BC2A  
 EXPNO 1  
 PROCNO 1

F2 - Acquisition Parameters  
 Date\_ 20080813  
 Time 15.40  
 INSTRUM gn500  
 PROBHD 5 mm broadband  
 PULPROG zg30  
 TD 81728  
 SOLVENT CDCl3T  
 NS 8  
 DS 2  
 SWH 8012.820 Hz  
 FIDRES 0.098043 Hz  
 AQ 5.0998774 sec  
 RG 161.3  
 DW 62.400 usec  
 DE 6.00 usec  
 TE 298.0 K  
 DL 0.10000000 sec  
 MCREST 0.00000000 sec  
 MCWRR 0.01500000 sec

===== CHANNEL f1 =====  
 NUC1 1H  
 P1 12.00 usec  
 PL1 -3.00 dB  
 SF01 499.7234980 MHz

F2 - Processing parameters  
 SI 65536  
 SF 499.7200303 MHz  
 WDW EM  
 SSB 0  
 LB 0.30 Hz  
 GB 0  
 PC 1.00

1D NMR plot parameters  
 CX 22.80 cm  
 CY 8.46 cm  
 F1P 9.000 ppm  
 F1 4497.48 Hz  
 F2P -0.500 ppm  
 F2 -249.86 Hz  
 PPMCM 0.41667 ppm/cm  
 HZCM 208.21669 Hz/cm



13C spectrum with 1H decoupling

ppm

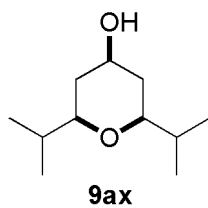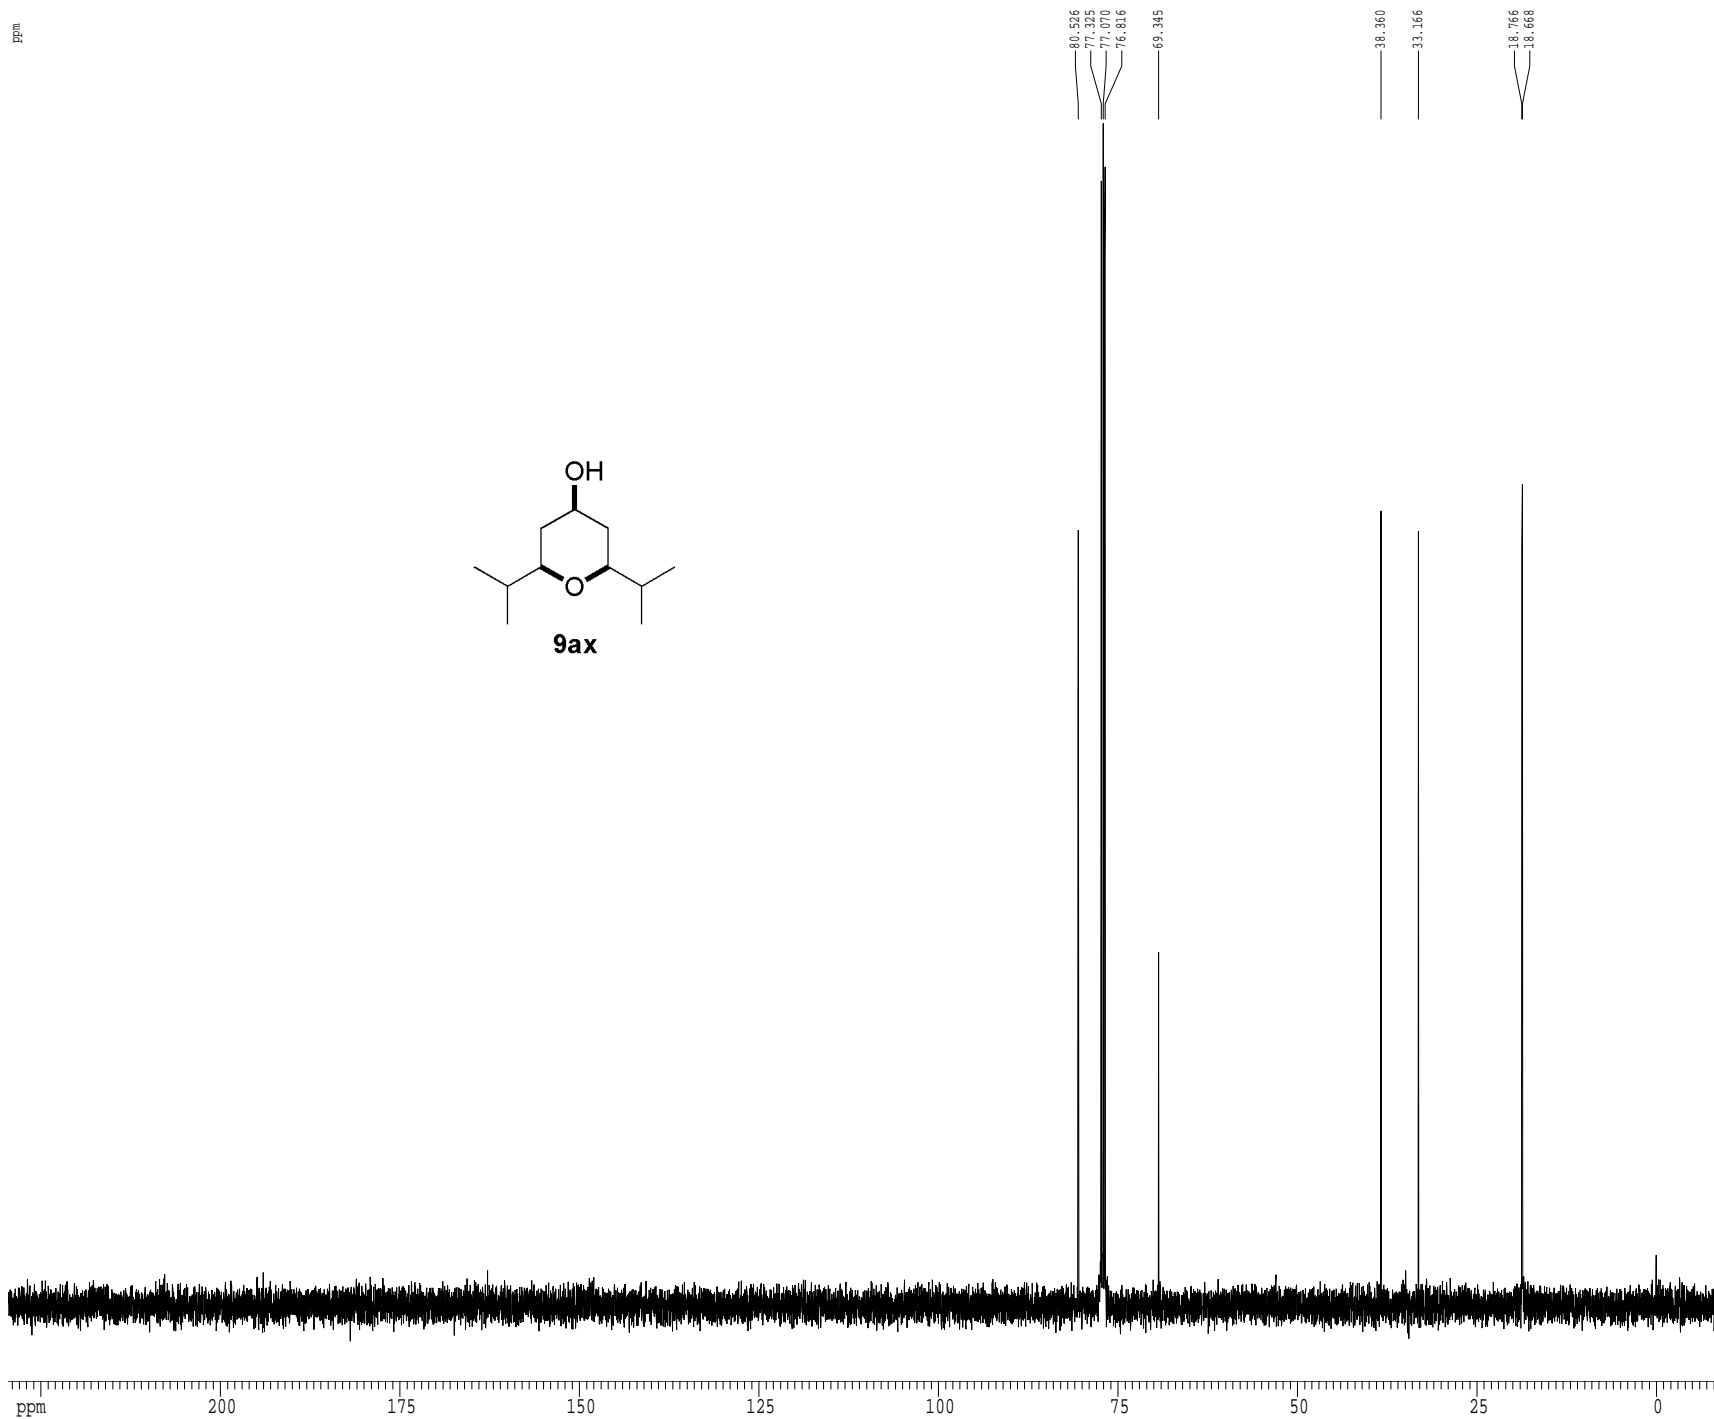

Current Data Parameters  
 USER tadpet  
 NAME KT-2-270BC2A  
 EXPNO 2  
 PROCNO 1

F2 - Acquisition Parameters  
 Date\_ 20080813  
 Time 15.44  
 INSTRUM gm500  
 PROBHND 5 mm broadband  
 PULPROG zgdc30  
 TD 65536  
 SOLVENT CDC13  
 NS 241  
 DS 4  
 SWH 30303.031 Hz  
 FIDRES 0.462388 Hz  
 AQ 1.0813940 sec  
 RG 3251  
 DW 16.500 usec  
 DE 4.50 usec  
 TE 298.0 K  
 D1 0.25000000 sec  
 d11 0.03000000 sec  
 MCREST 0.00000000 sec  
 MCWREK 0.01500000 sec

===== CHANNEL f1 =====  
 NUC1 13C  
 P1 7.08 usec  
 PL1 0.00 dB  
 SF01 125.6685160 MHz

===== CHANNEL f2 =====  
 CPDPRG2 waltz16  
 NUC2 1H  
 PCPD2 80.00 usec  
 PL2 -3.00 dB  
 PL12 14.70 dB  
 SF02 499.7224986 MHz

F2 - Processing parameters  
 SI 65536  
 SF 125.6546921 MHz  
 WDW EM  
 SSB 0  
 LB 1.00 Hz  
 GB 0  
 PC 2.00

ID NMR plot parameters  
 CX 22.80 cm  
 CY 15.65 cm  
 F1P 229.520 ppm  
 F1 28840.22 Hz  
 F2P -10.507 ppm  
 F2 -1320.20 Hz  
 PPMCM 10.52747 ppm/cm  
 HZCM 1322.82581 Hz/cm

<sup>1</sup>H spectrum

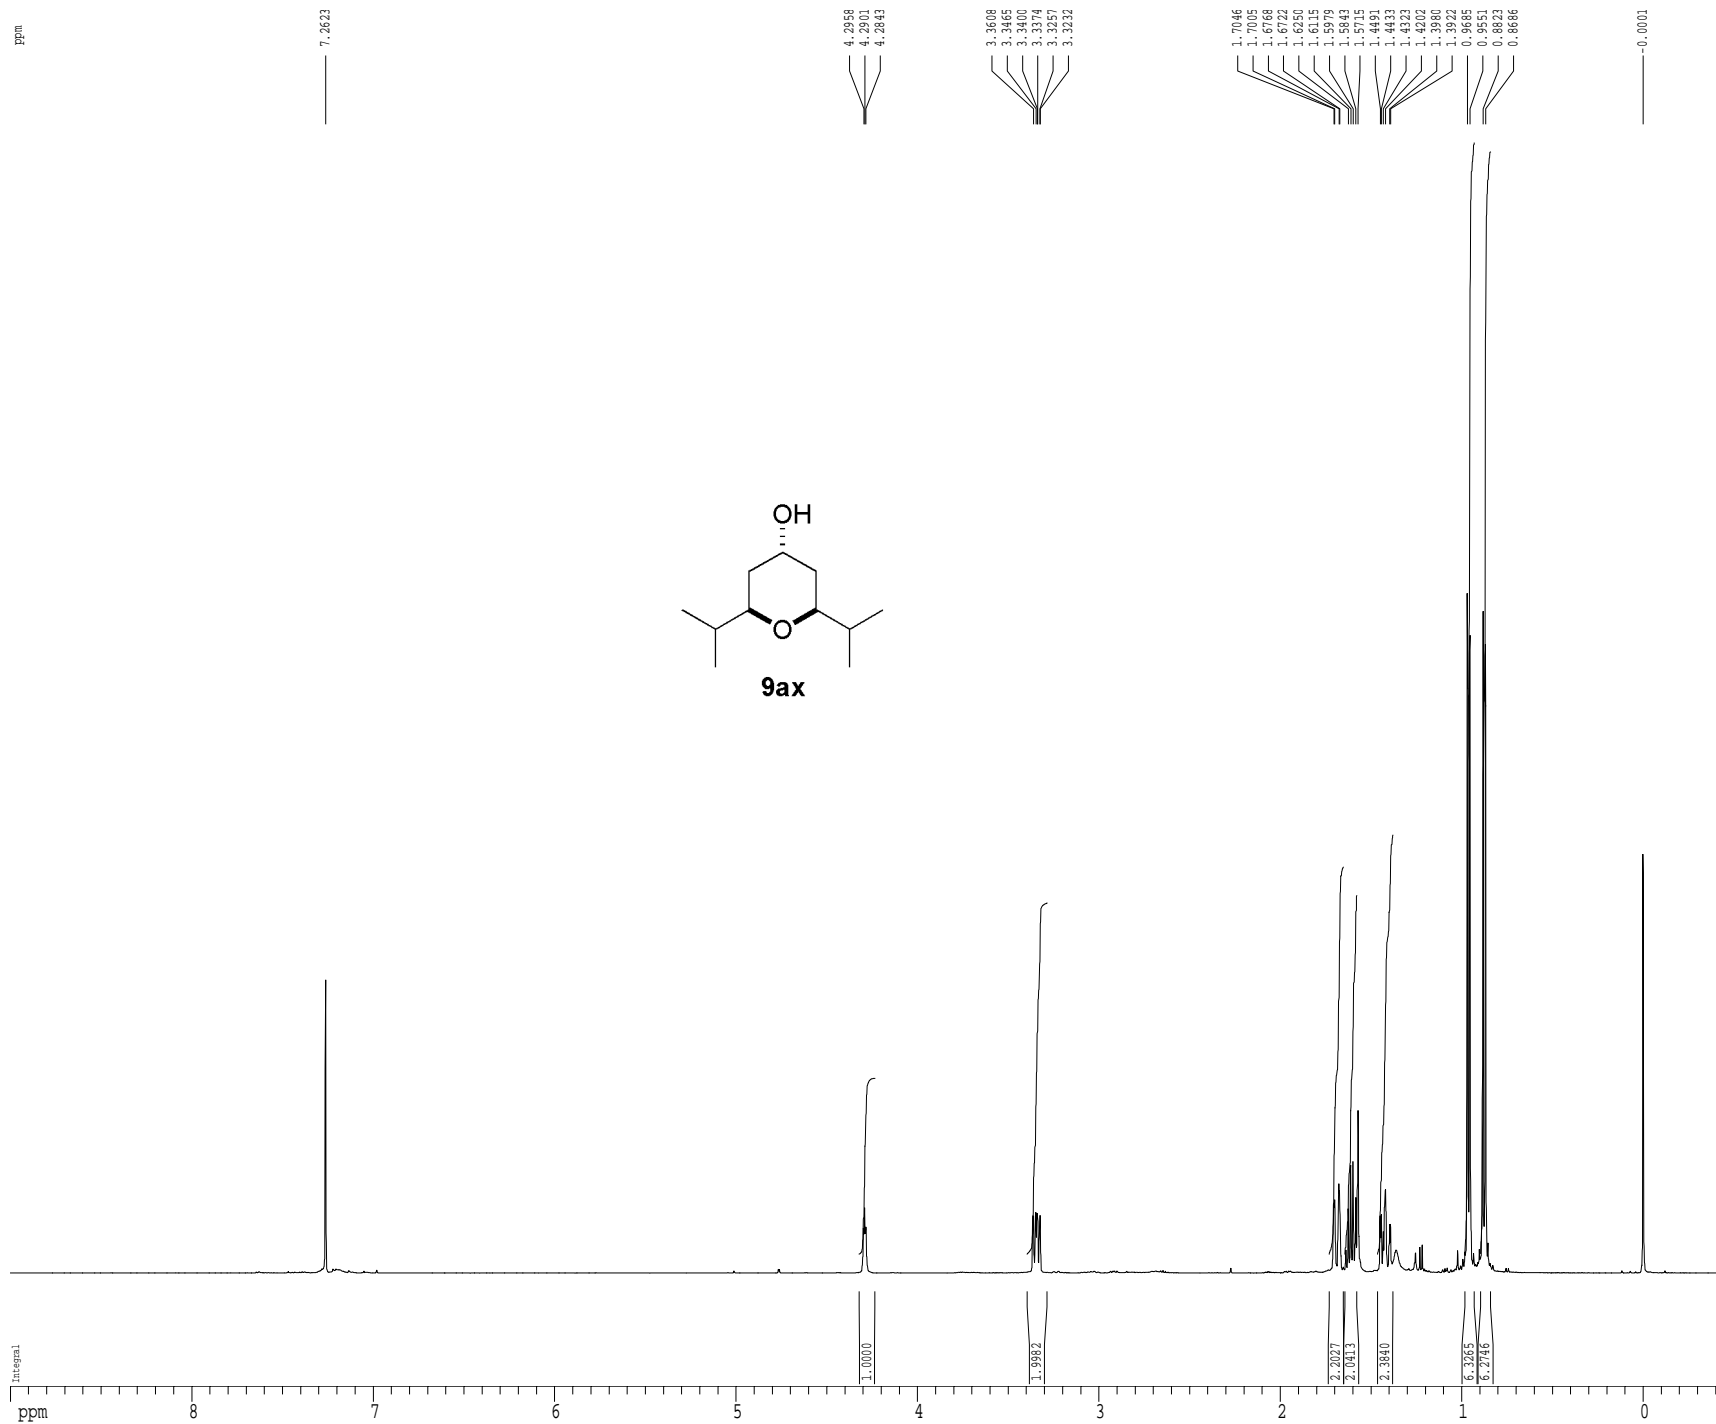

```

Current Data Parameters
USER      tadpet
NAME      KT-2-270A
EXPNO     1
PROCNO    1

F2 - Acquisition Parameters
Date_     20080521
Time      18.20
INSTRUM   cryo500
PROBHD    5 mm CPTCI 1H-
PULPROG   zg30
TD         81728
SOLVENT   CDCl3T
NS         8
DS         2
SWH        8012.820 Hz
FIDRES     0.098043 Hz
AQ         5.0998774 sec
RG         6.3
DW         62.400 usec
DE         6.00 usec
TE         298.0 K
DL         0.10000000 sec
MCREST    0.00000000 sec
MCWRX     0.01500000 sec

===== CHANNEL f1 =====
NUC1      1H
P1        7.38 usec
PL1       1.60 dB
SF01      500.2235015 MHz

F2 - Processing parameters
SI         65536
SF         500.2200300 MHz
WDW        EM
SSB        0
LB         0.30 Hz
GB         0
PC         4.00

1D NMR plot parameters
CX         22.80 cm
CY         9.01 cm
F1P        9.000 ppm
F1         4501.98 Hz
F2P        -0.500 ppm
F2         -250.11 Hz
PPMCM     0.41667 ppm/cm
HZCM      208.42502 Hz/cm
    
```

13C spectrum with 1H decoupling

ppm

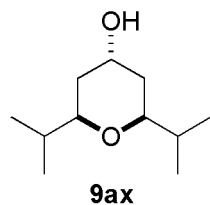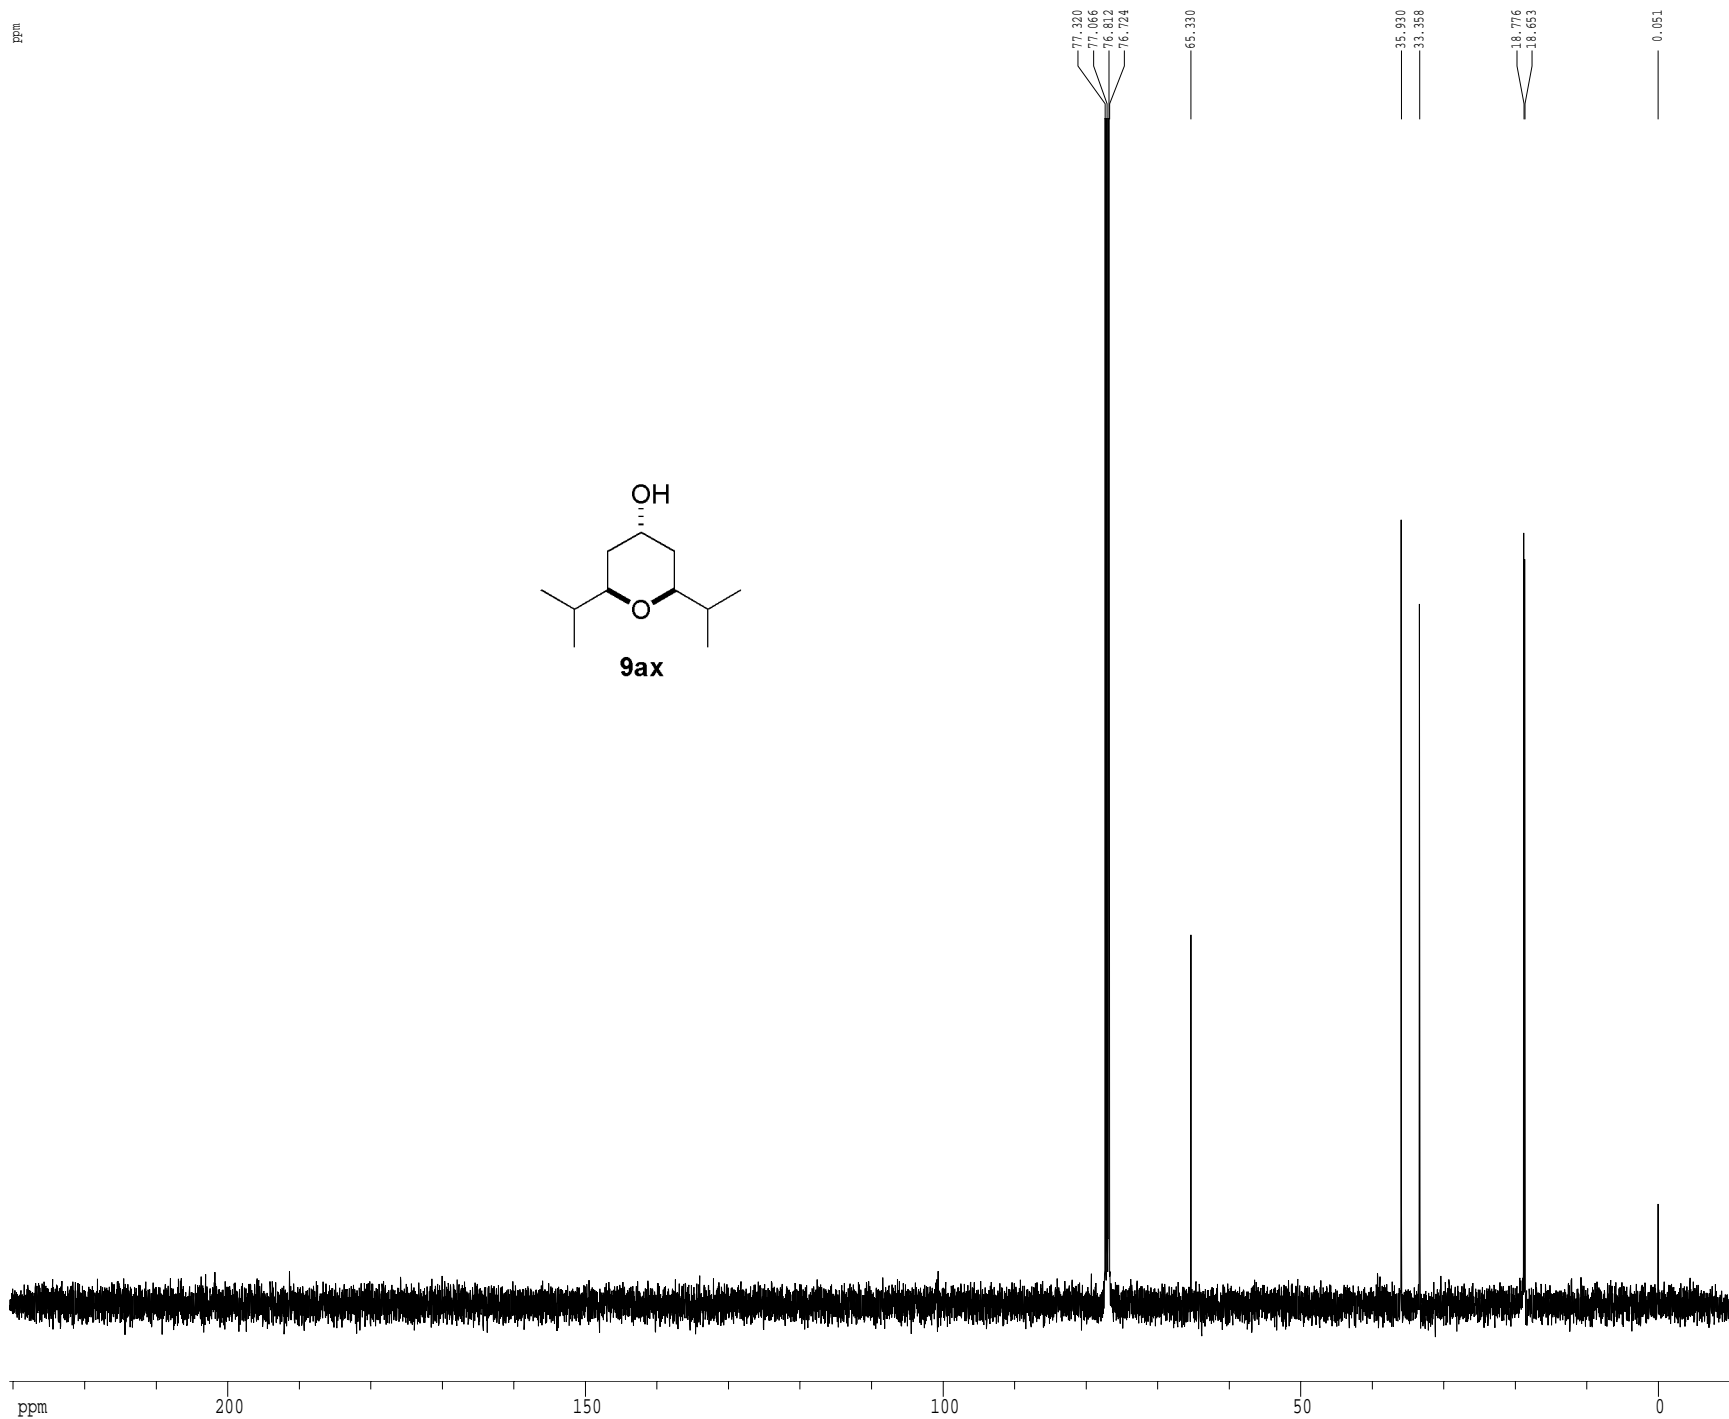

Current Data Parameters  
 USER tadpet  
 NAME KT-2-270A  
 EXPNO 2  
 PROCNO 1

F2 - Acquisition Parameters  
 Date\_ 20080521  
 Time 18.24  
 INSTRUM cryo500  
 PROBHD 5 mm CPTCI 1H-  
 PULPROG zgdc30  
 TD 65418  
 SOLVENT CDCl3  
 NS 174  
 DS 4  
 SWH 30303.031 Hz  
 FIDRES 0.463222 Hz  
 AQ 1.0794470 sec  
 RG 13004  
 DW 16.500 usec  
 DE 6.00 usec  
 TE 298.0 K  
 D1 0.25000000 sec  
 d11 0.03000000 sec  
 MCREST 0.00000000 sec  
 MCWRK 0.01500000 sec

===== CHANNEL f1 =====  
 NUC1 13C  
 P1 14.75 usec  
 PL1 -1.00 dB  
 SF01 125.7942548 MHz

===== CHANNEL f2 =====  
 CPDPRG2 waltz16  
 NUC2 1H  
 PCPD2 100.00 usec  
 PL2 1.60 dB  
 PL12 24.80 dB  
 SF02 500.2225011 MHz

F2 - Processing parameters  
 SI 65536  
 SF 125.7804190 MHz  
 WDW EM  
 SSB 0  
 LB 1.00 Hz  
 GB 0  
 PC 2.00

1D NMR plot parameters  
 CX 22.80 cm  
 CY 39.27 cm  
 F1P 230.637 ppm  
 F1 29009.68 Hz  
 F2P -10.287 ppm  
 F2 -1293.96 Hz  
 PPMCM 10.56688 ppm/cm  
 HZCM 1329.10706 Hz/cm

ppm

200

150

100

50

0

<sup>1</sup>H spectrum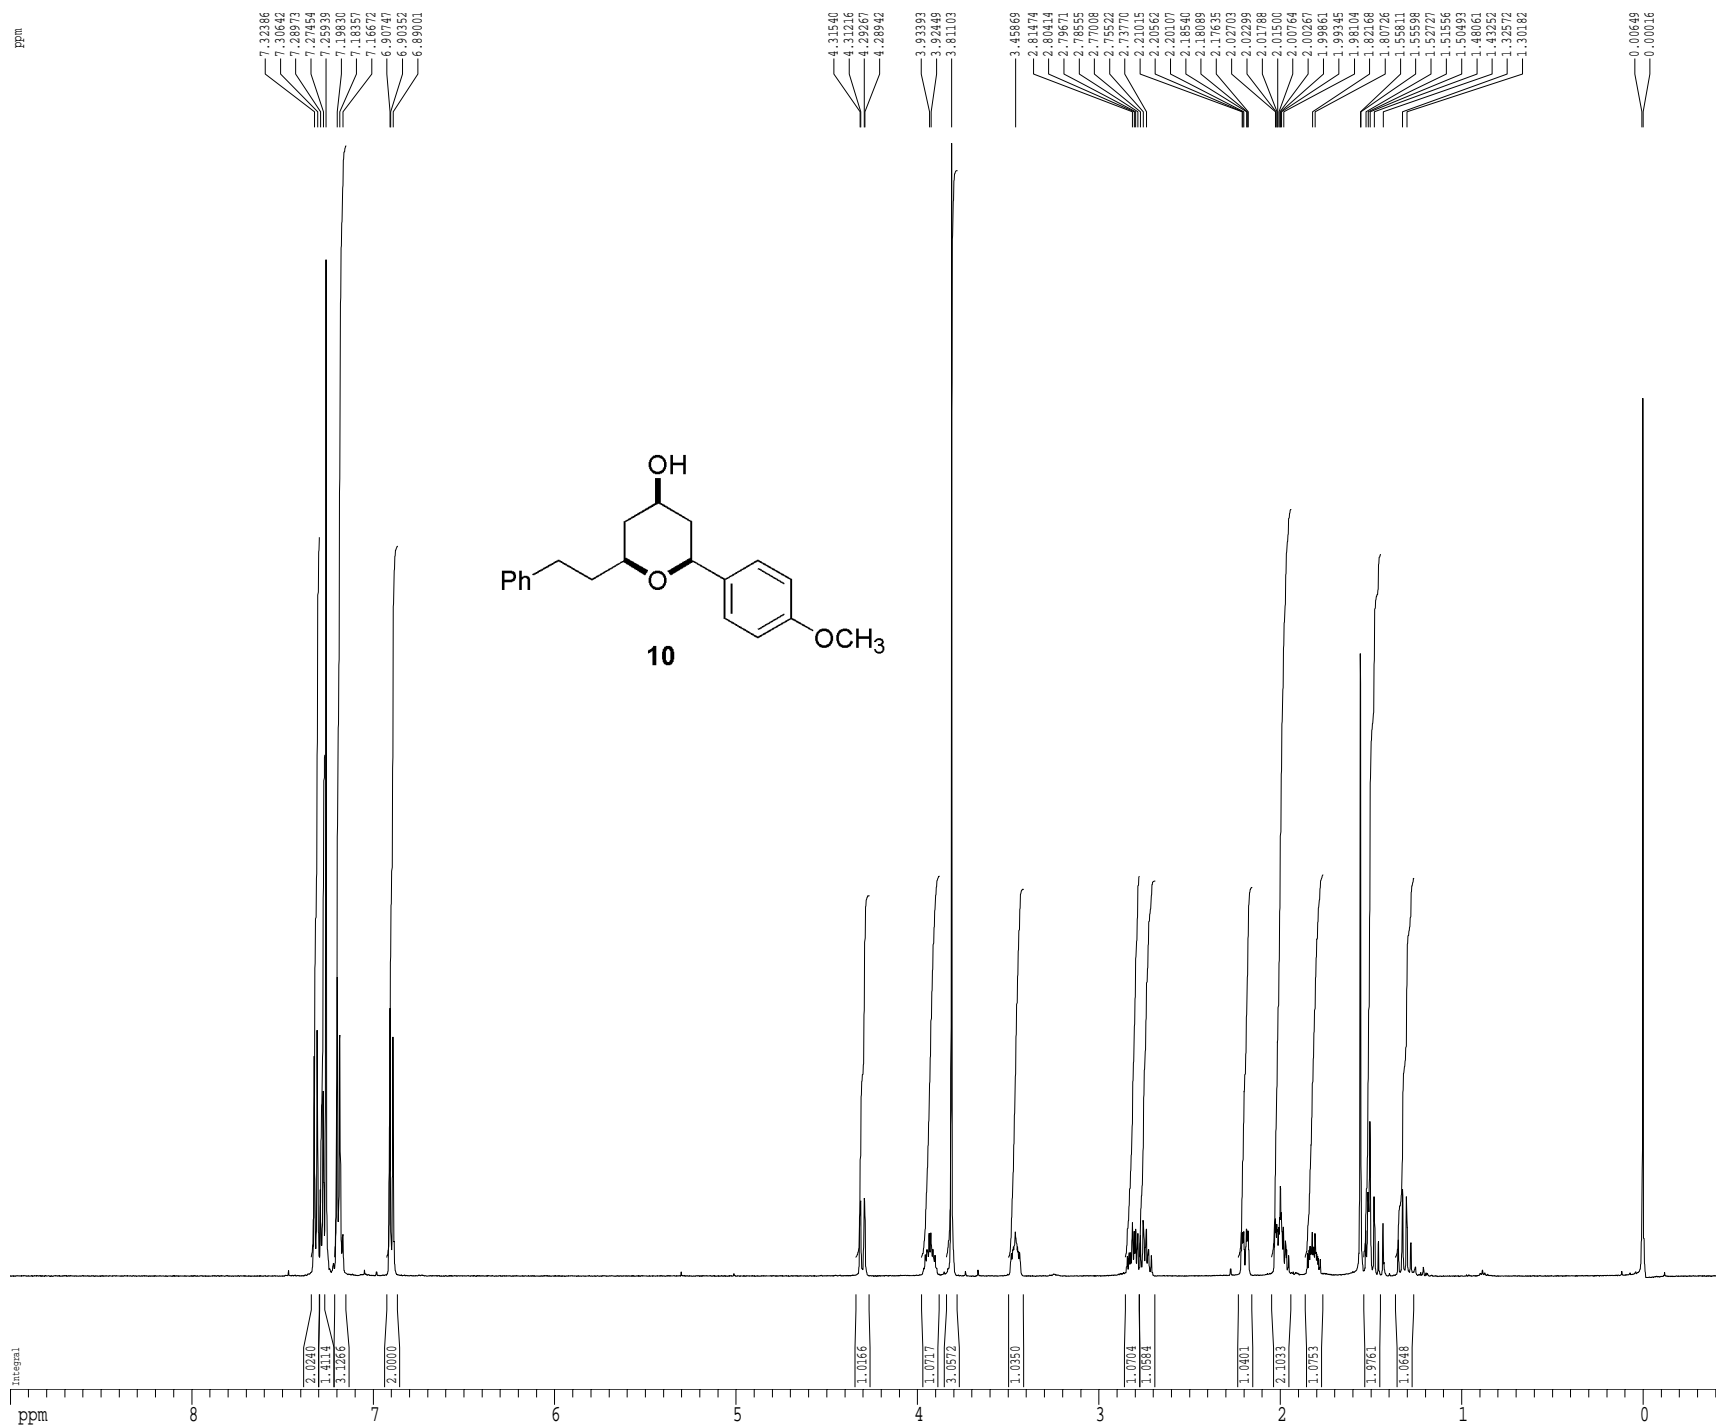

Current Data Parameters  
 USER tadpet  
 NAME KT-2-211C  
 EXPNO 1  
 PROCNO 1

F2 - Acquisition Parameters  
 Date\_ 20080219  
 Time 17.15  
 INSTRUM cryo500  
 PROBHD 5 mm CPTCI 1H-  
 PULPROG zg30  
 TD 81728  
 SOLVENT CDCl3T  
 NS 8  
 DS 2  
 SWH 8012.820 Hz  
 FIDRES 0.098043 Hz  
 AQ 5.0998774 sec  
 RG 5.7  
 DW 62.400 usec  
 DE 6.00 usec  
 TE 298.0 K  
 DL 0.10000000 sec  
 MCREST 0.00000000 sec  
 MCWEX 0.01500000 sec

===== CHANNEL f1 =====  
 NUC1 1H  
 P1 7.38 usec  
 PL1 1.60 dB  
 SF01 500.2235015 MHz

F2 - Processing parameters  
 SI 65536  
 SF 500.2200311 MHz  
 WDW EM  
 SSB 0  
 LB 0.30 Hz  
 GB 0  
 PC 4.00

1D NMR plot parameters  
 CX 22.80 cm  
 CY 15.00 cm  
 F1P 9.000 ppm  
 F1 4501.98 Hz  
 F2P -0.500 ppm  
 F2 -250.11 Hz  
 PPMCM 0.41667 ppm/cm  
 HZCM 208.42502 Hz/cm

<sup>13</sup>C spectrum with <sup>1</sup>H decoupling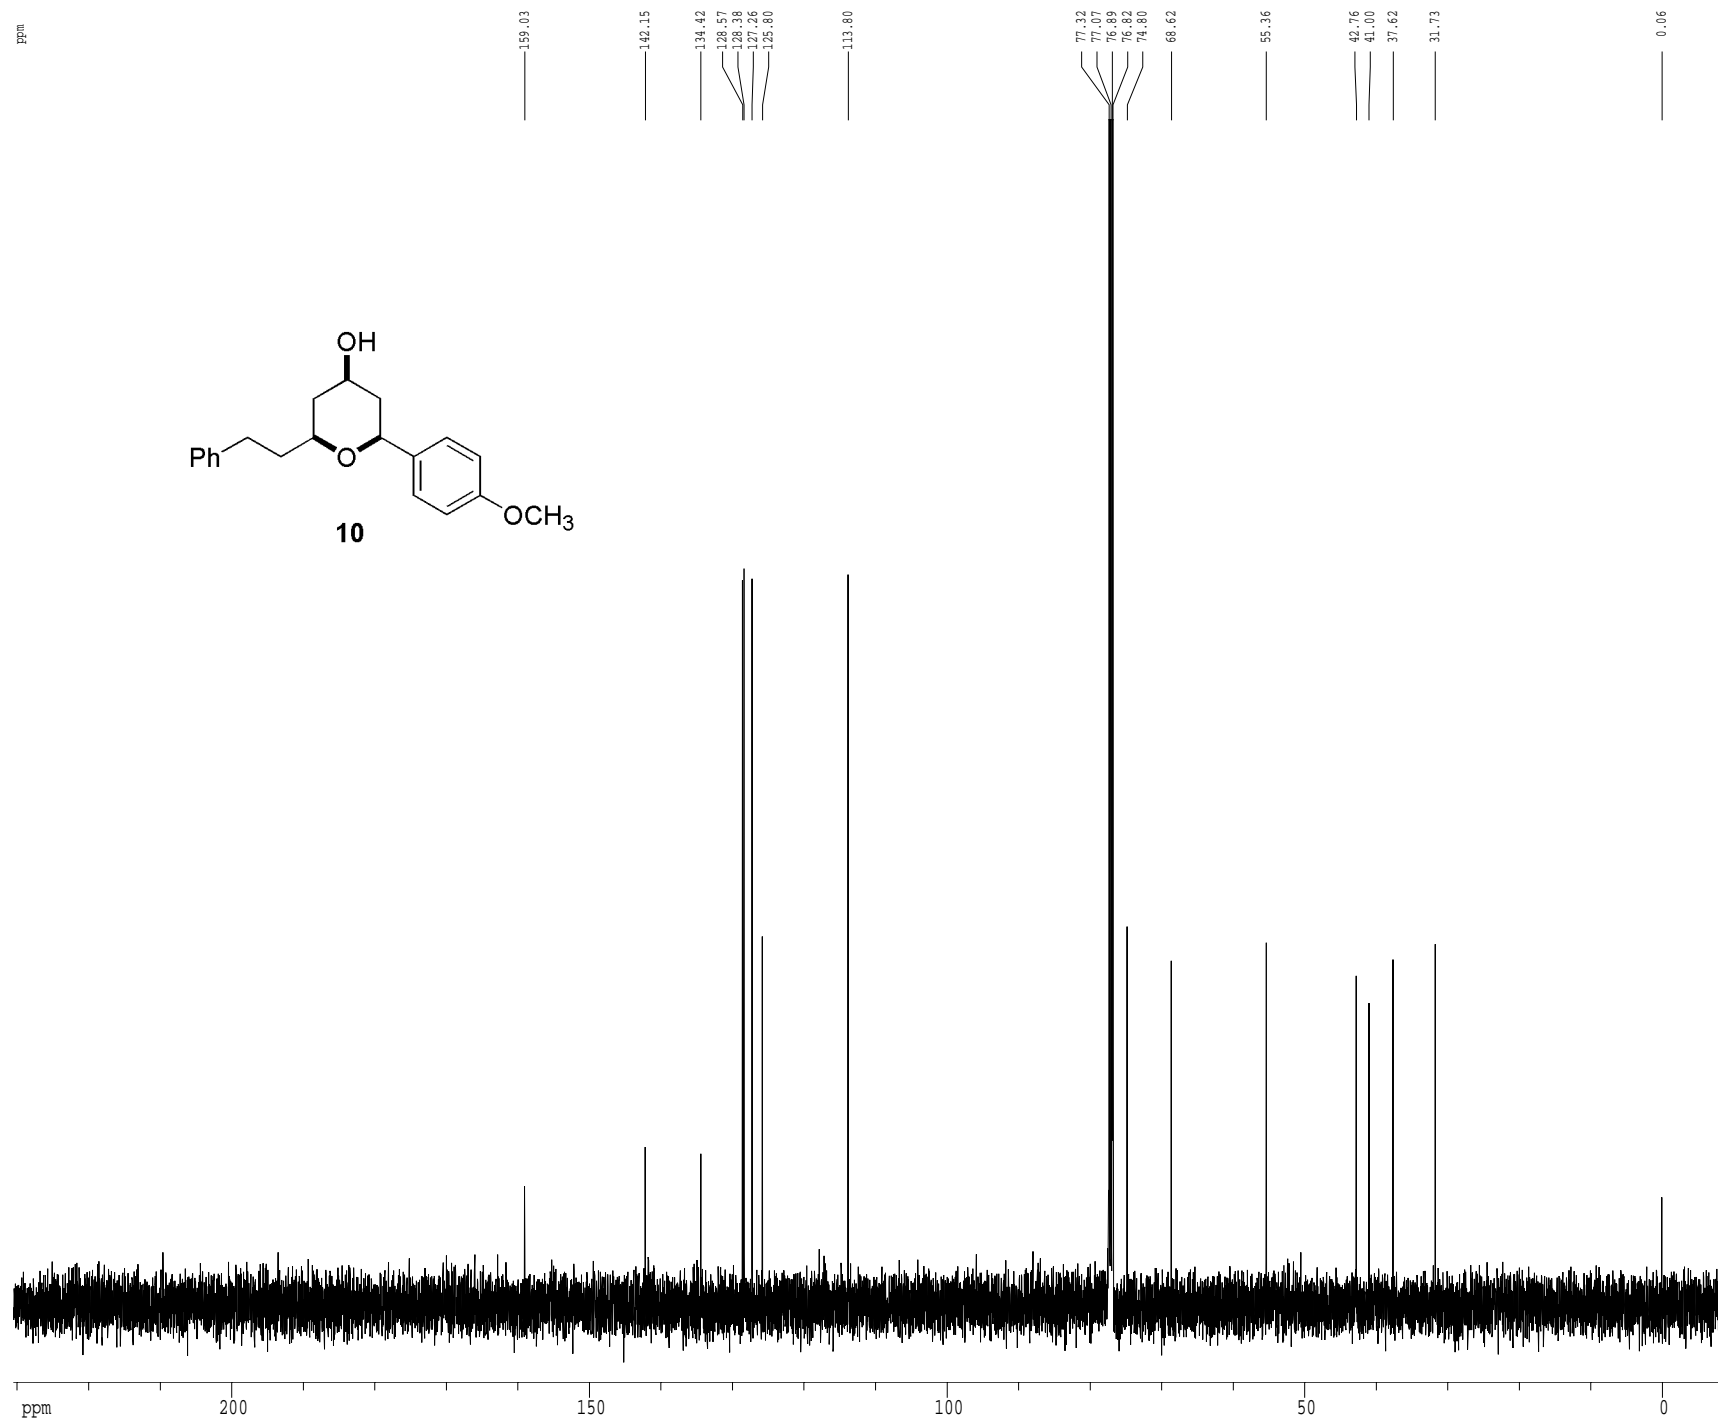

Current Data Parameters  
 USER tadpet  
 NAME KT-2-211C  
 EXPNO 2  
 PROCNO 1

F2 - Acquisition Parameters  
 Date\_ 20080219  
 Time 17.20  
 INSTRUM cryo500  
 PROBHD 5 mm CPTCI 1H-  
 PULPROG zgdc30  
 TD 65418  
 SOLVENT CDC13  
 NS 174  
 DS 4  
 SWH 30303.031 Hz  
 FIDRES 0.463222 Hz  
 AQ 1.0794470 sec  
 RG 11585.2  
 DN 16.500 usec  
 DE 6.00 usec  
 TE 298.0 K  
 D1 0.25000000 sec  
 d11 0.03000000 sec  
 MCREST 0.00000000 sec  
 MCWREX 0.01500000 sec

===== CHANNEL f1 =====  
 NUC1 13C  
 P1 14.75 usec  
 PL1 -1.00 dB  
 SF01 125.7942548 MHz

===== CHANNEL f2 =====  
 CPDPRG2 waltz16  
 NUC2 1H  
 PCPD2 100.00 usec  
 PL2 1.60 dB  
 PL12 24.80 dB  
 SF02 500.2225011 MHz

F2 - Processing parameters  
 SI 65536  
 SF 125.7804190 MHz  
 WDW EM  
 SSB 0  
 LB 1.00 Hz  
 GB 0  
 PC 2.00

1D NMR plot parameters  
 CX 22.80 cm  
 CY 58.49 cm  
 F1P 230.637 ppm  
 F1 29009.68 Hz  
 F2P -10.287 ppm  
 F2 -1293.96 Hz  
 PPMCM 10.56688 ppm/cm  
 HZCM 1329.10706 Hz/cm

<sup>1</sup>H spectrum

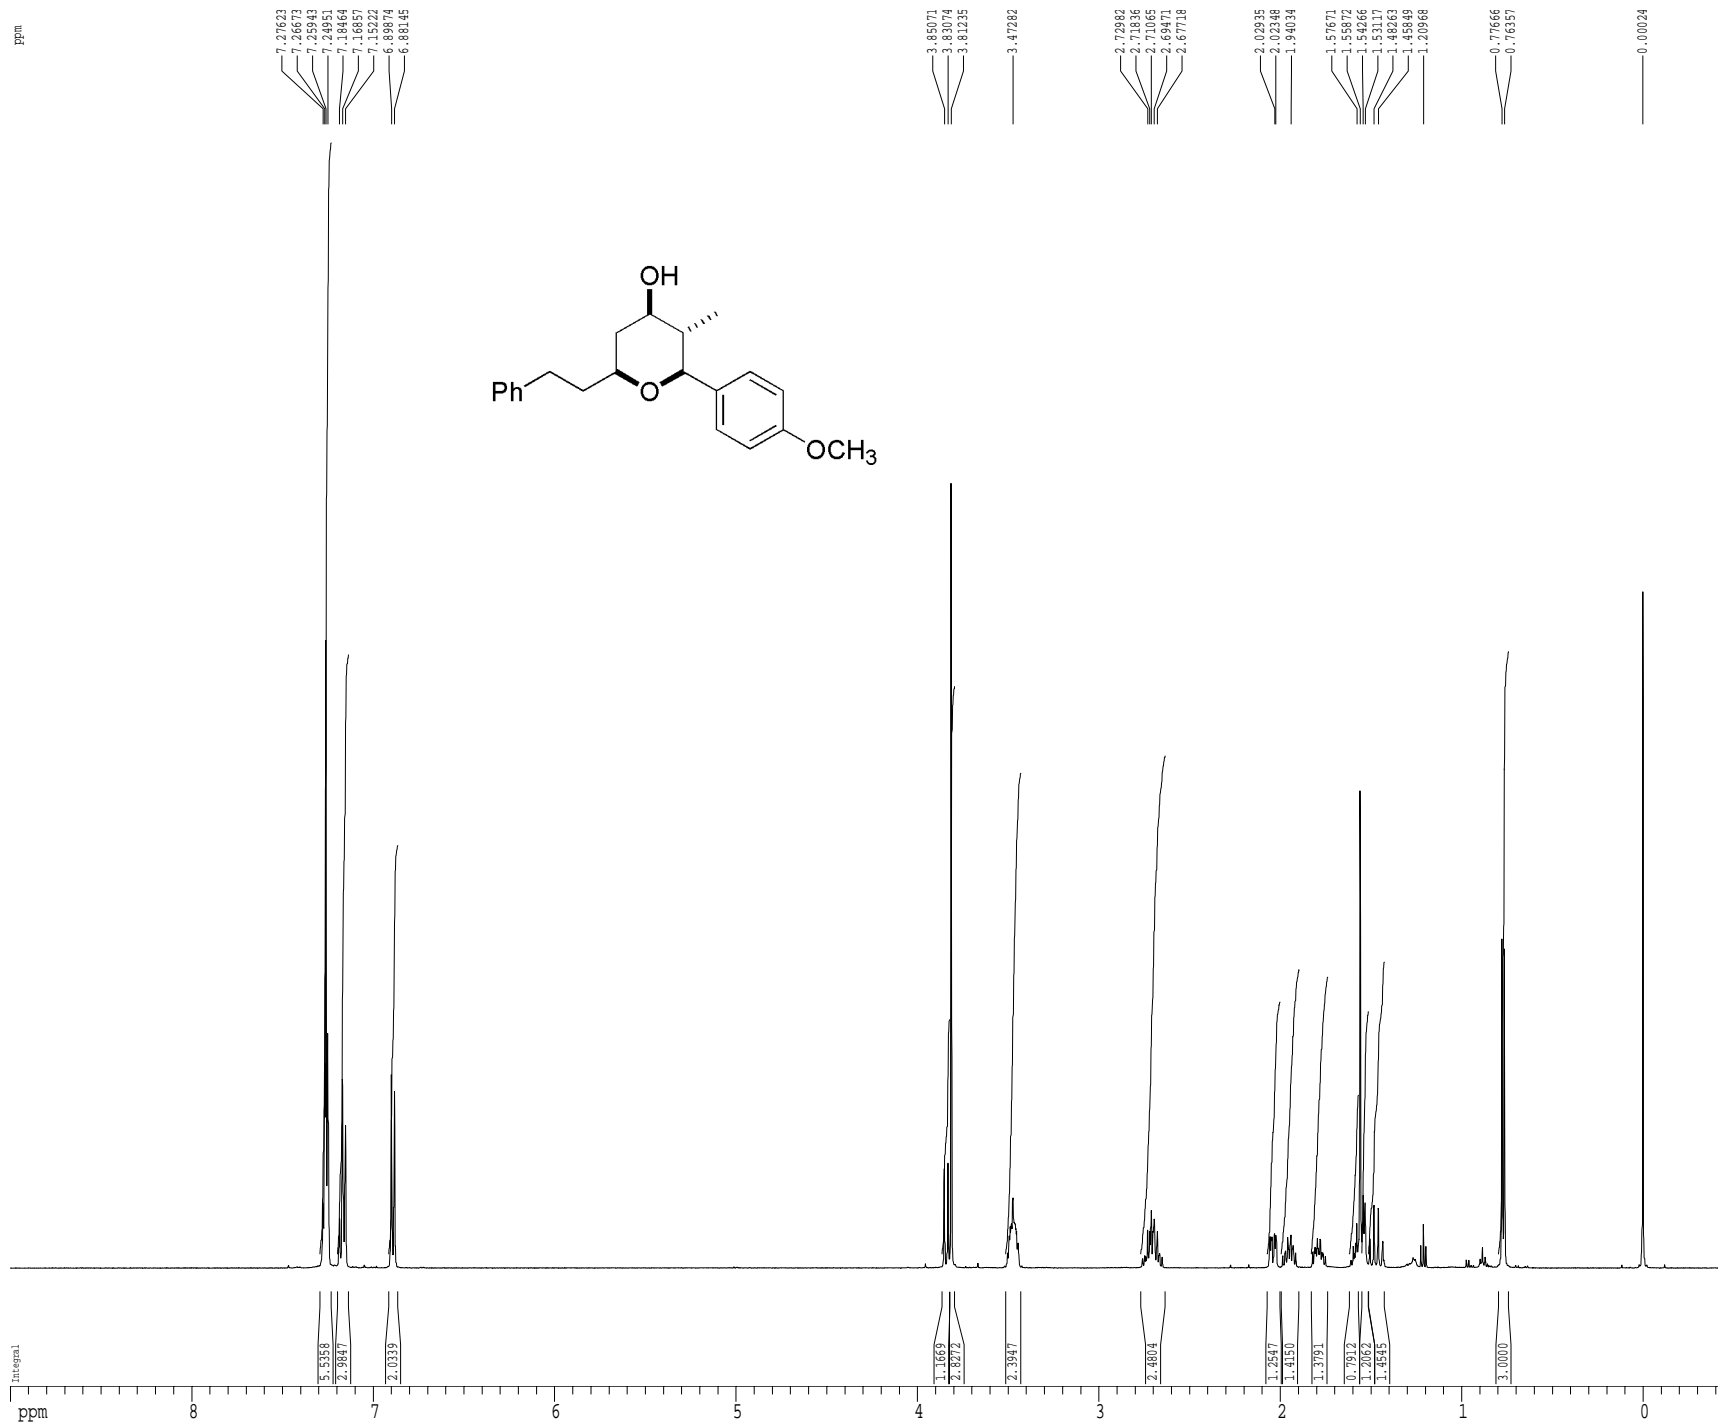

```

Current Data Parameters
USER          tadpet
NAME          KT-2-257
EXPNO        1
PROCNO       1

F2 - Acquisition Parameters
Date_        20080421
Time         10.43
INSTRUM      cryo500
PROBHD       5 mm CPTCI 1H-
PULPROG      zg30
TD           81728
SOLVENT      CDCl3T
NS           8
DS           2
SWH          8012.820 Hz
FIDRES       0.098043 Hz
AQ           5.0998774 sec
RG           5.7
DW           62.400 usec
DE           6.00 usec
TE           298.0 K
DL           0.10000000 sec
MCREST       0.00000000 sec
MCWRX        0.01500000 sec

===== CHANNEL f1 =====
NUC1         1H
P1           7.38 usec
PL1          1.60 dB
SF01         500.2235015 MHz

F2 - Processing parameters
SI           65536
SF           500.2200314 MHz
WDW          EM
SSB          0
LB           0.30 Hz
GB           0
PC           4.00

1D NMR plot parameters
CX           22.80 cm
CY           10.46 cm
F1P         9.000 ppm
F1           4501.98 Hz
F2P         -0.500 ppm
F2           -250.11 Hz
PPMCM       0.41667 ppm/cm
HZCM        208.42502 Hz/cm
    
```

<sup>13</sup>C spectrum with <sup>1</sup>H decoupling

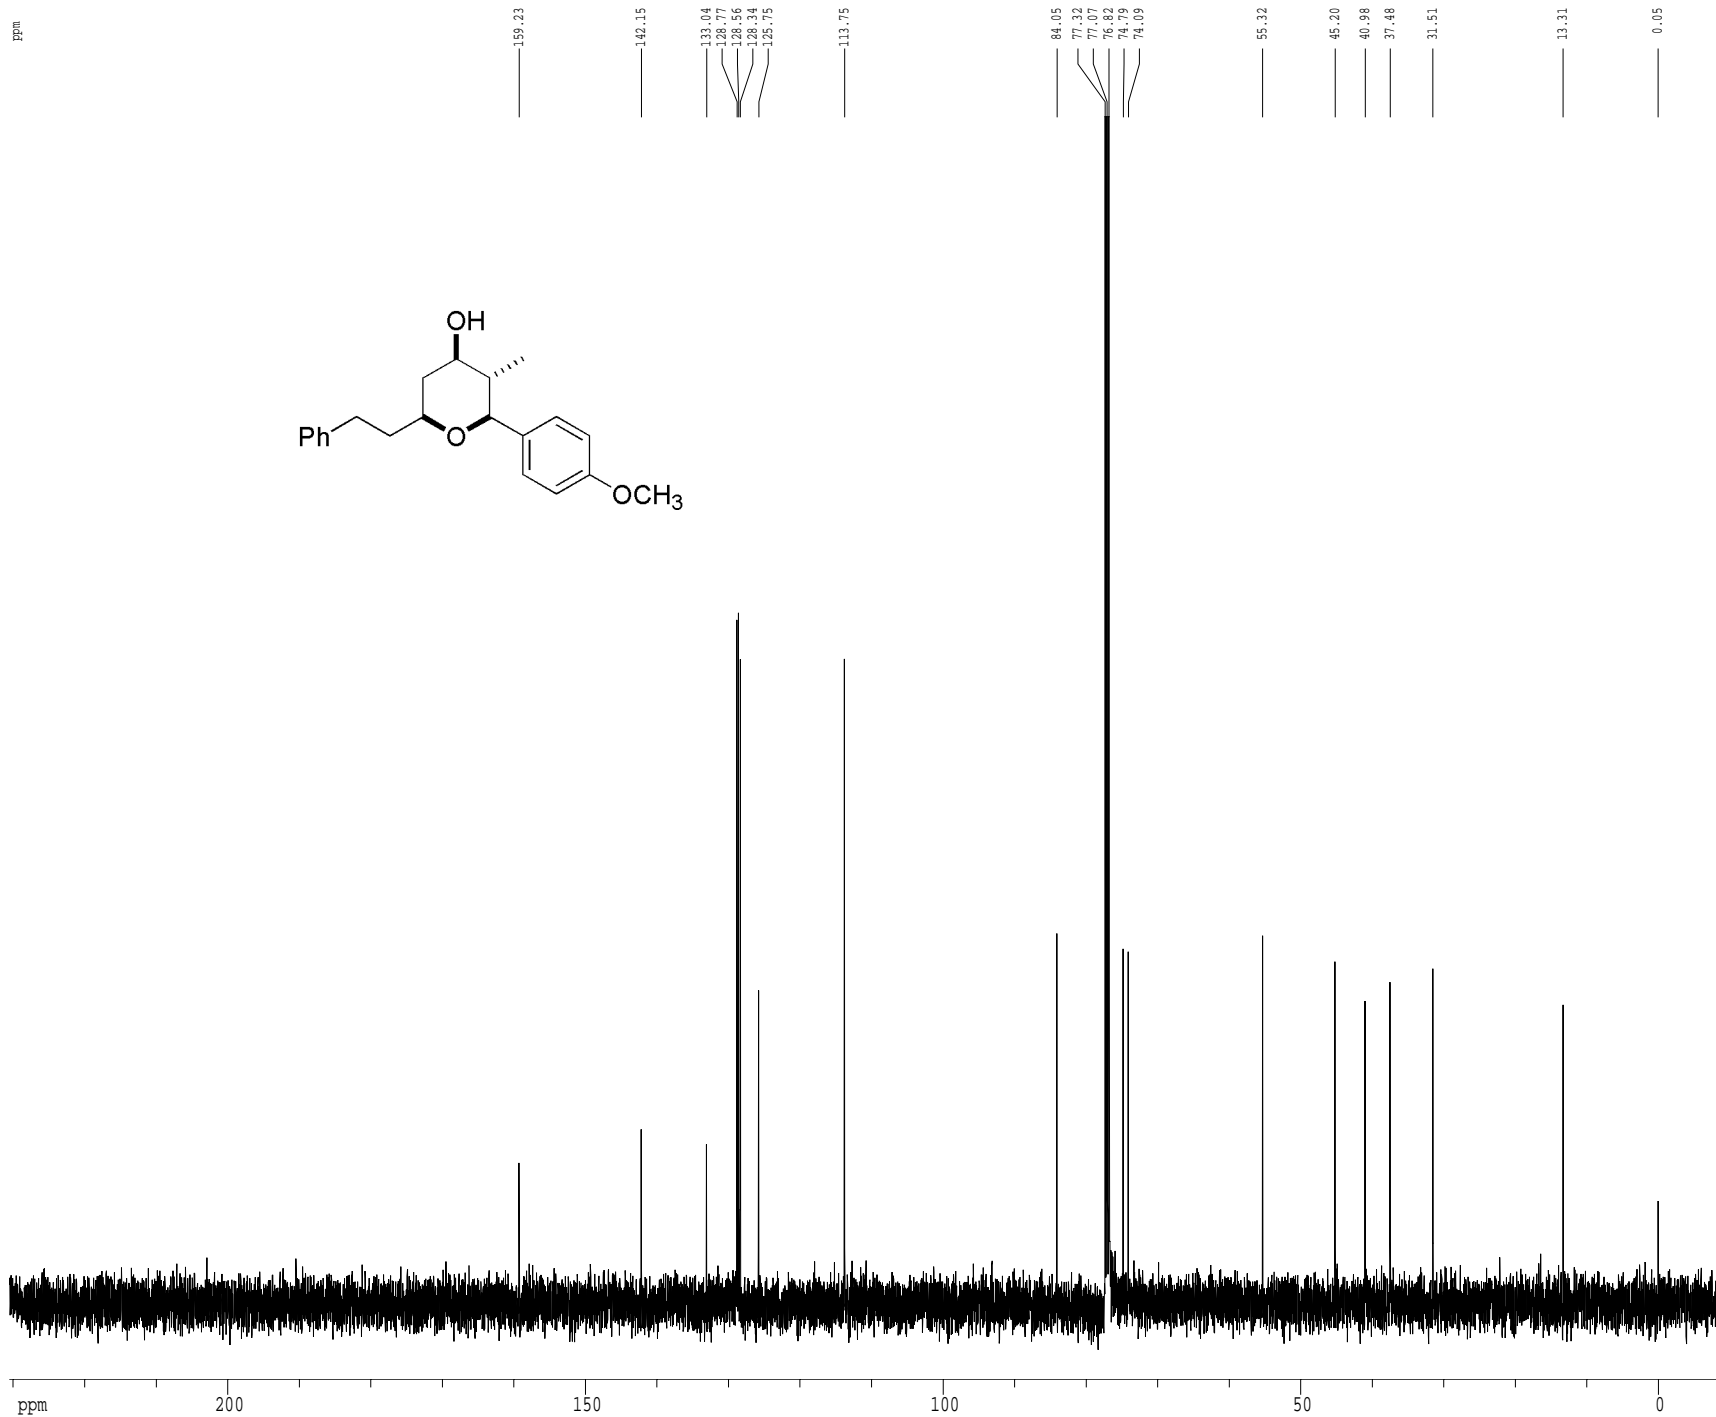

Current Data Parameters  
 USER tadpet  
 NAME KT-2-257  
 EXPNO 2  
 PROCNO 1

F2 - Acquisition Parameters  
 Date\_ 20080421  
 Time 10.47  
 INSTRUM cryo500  
 PROBHND 5 mm CPTCI 1H-  
 PULPROG zgdc30  
 TD 65418  
 SOLVENT CDCl3  
 NS 135  
 DS 4  
 SWH 30303.031 Hz  
 FIDRES 0.463222 Hz  
 AQ 1.0794470 sec  
 RG 13004  
 DW 16.500 usec  
 DE 6.00 usec  
 TE 298.0 K  
 D1 0.25000000 sec  
 d11 0.03000000 sec  
 MCREST 0.00000000 sec  
 MCWREK 0.01500000 sec

===== CHANNEL f1 =====  
 NUC1 13C  
 P1 14.75 usec  
 PL1 -1.00 dB  
 SF01 125.7942548 MHz

===== CHANNEL f2 =====  
 CPDPRG2 waltz16  
 NUC2 1H  
 PCPD2 100.00 usec  
 PL2 1.60 dB  
 PL12 24.80 dB  
 SF02 500.2225011 MHz

F2 - Processing parameters  
 SI 65536  
 SF 125.7804190 MHz  
 WDW EM  
 SSB 0  
 LB 1.00 Hz  
 GB 0  
 PC 2.00

ID NMR plot parameters  
 CX 22.80 cm  
 CY 49.52 cm  
 F1P 230.637 ppm  
 F1 29009.68 Hz  
 F2P -10.287 ppm  
 F2 -1293.96 Hz  
 PPMCM 10.56688 ppm/cm  
 HZCM 1329.10706 Hz/cm

## 1H spectrum

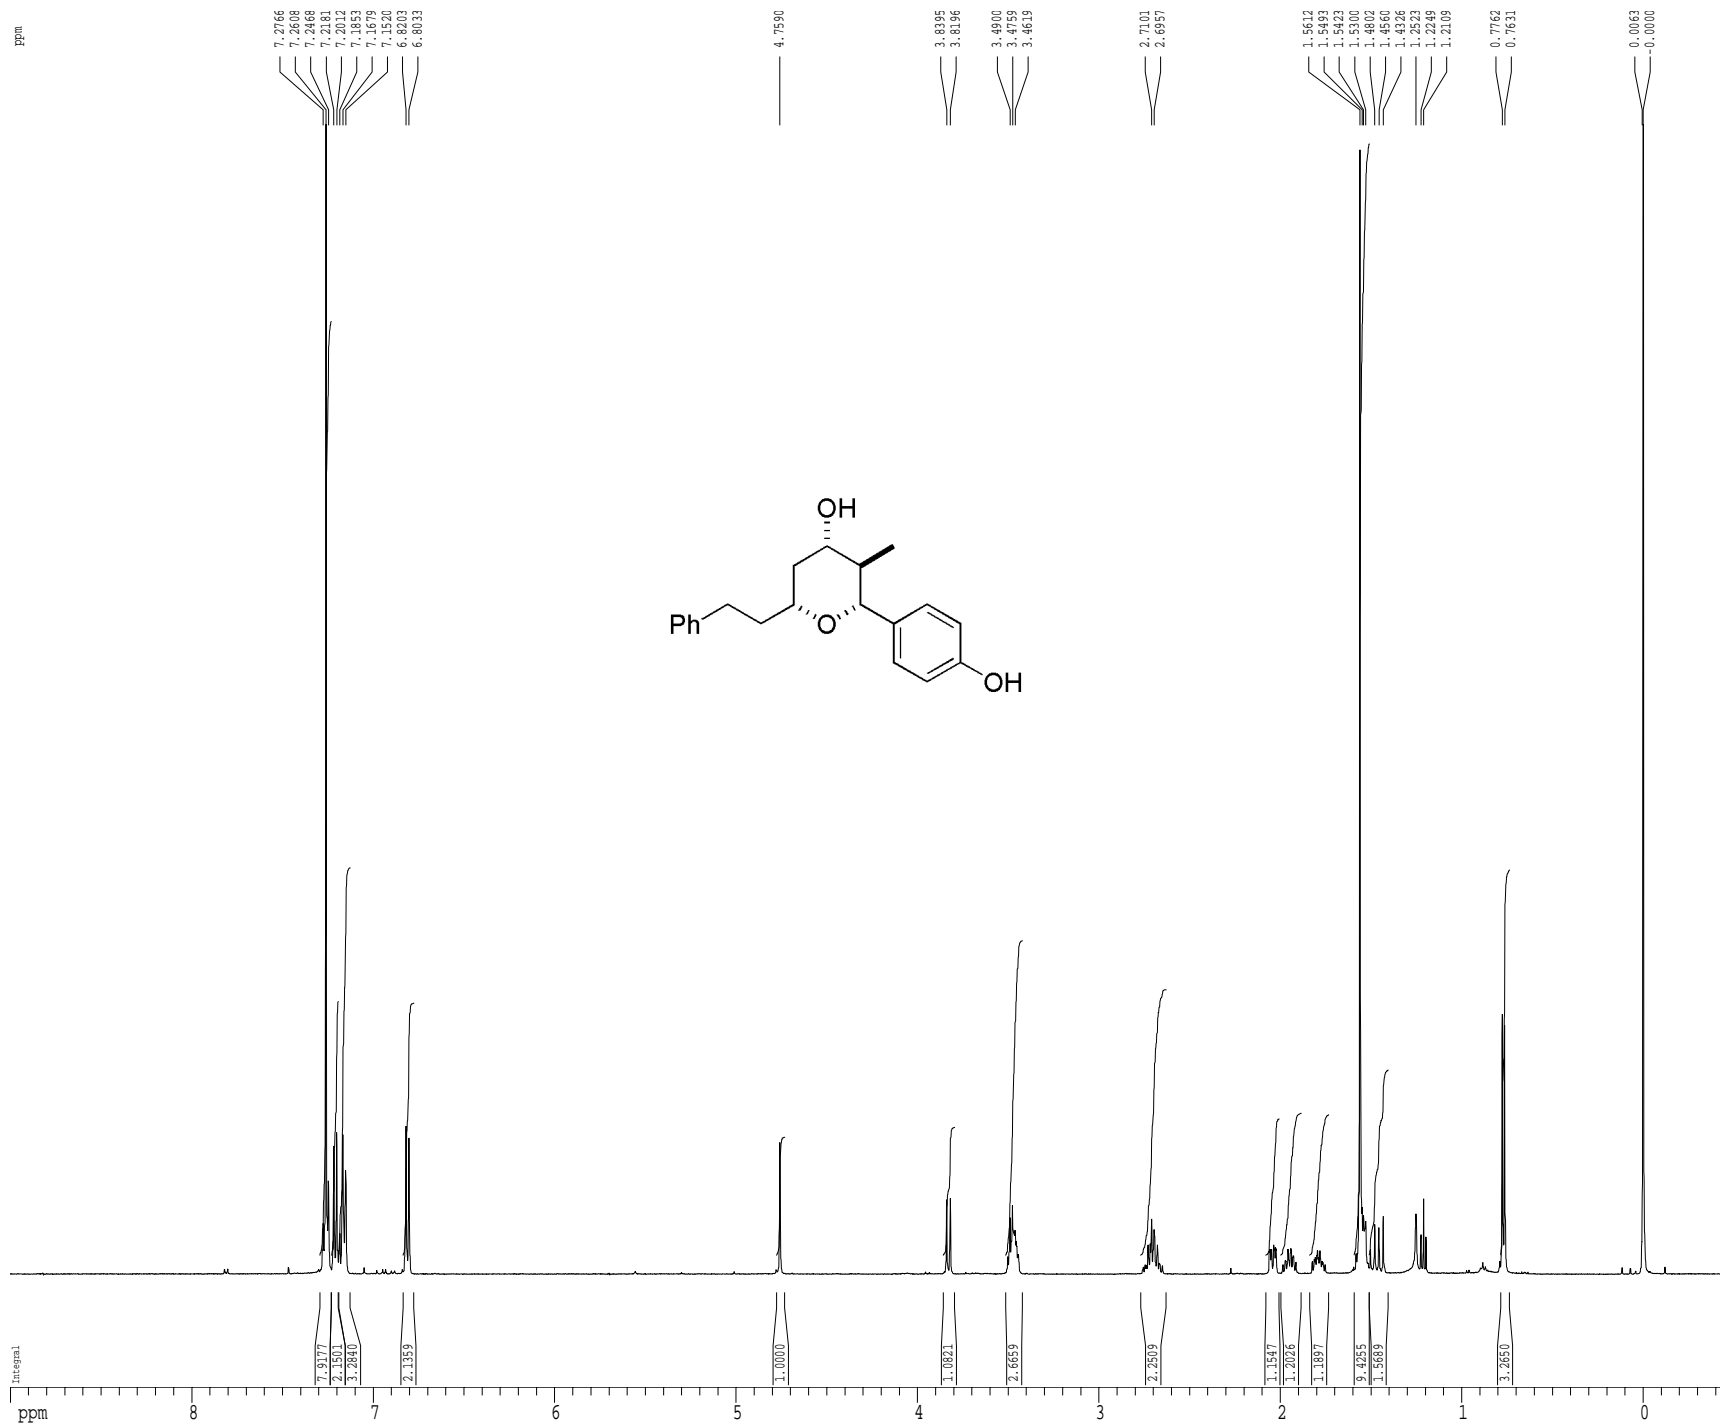

Current Data Parameters  
 USER tadpet  
 NAME KT-2-239  
 EXPNO 1  
 PROCNO 1

F2 - Acquisition Parameters  
 Date\_ 20080402  
 Time 11.23  
 INSTRUM cryo500  
 PROBHD 5 mm CPTCI 1H-  
 PULPROG zg30  
 TD 81728  
 SOLVENT CDCl3T  
 NS 16  
 DS 2  
 SWH 8012.820 Hz  
 FIDRES 0.098043 Hz  
 AQ 5.0998774 sec  
 RG 6.3  
 DW 62.400 usec  
 DE 6.00 usec  
 TE 298.0 K  
 DL 0.10000000 sec  
 MCREST 0.00000000 sec  
 MCWRR 0.01500000 sec

===== CHANNEL f1 =====  
 NUC1 1H  
 P1 7.38 usec  
 PL1 1.60 dB  
 SF01 500.2235015 MHz

F2 - Processing parameters  
 SI 65536  
 SF 500.2200307 MHz  
 WDW EM  
 SSB 0  
 LB 0.30 Hz  
 GB 0  
 PC 4.00

1D NMR plot parameters  
 CX 22.80 cm  
 CY 18.73 cm  
 F1P 9.000 ppm  
 F1 4501.98 Hz  
 F2P -0.500 ppm  
 F2 -250.11 Hz  
 PPMCM 0.41667 ppm/cm  
 HZCM 208.42502 Hz/cm



13C spectrum with 1H decoupling

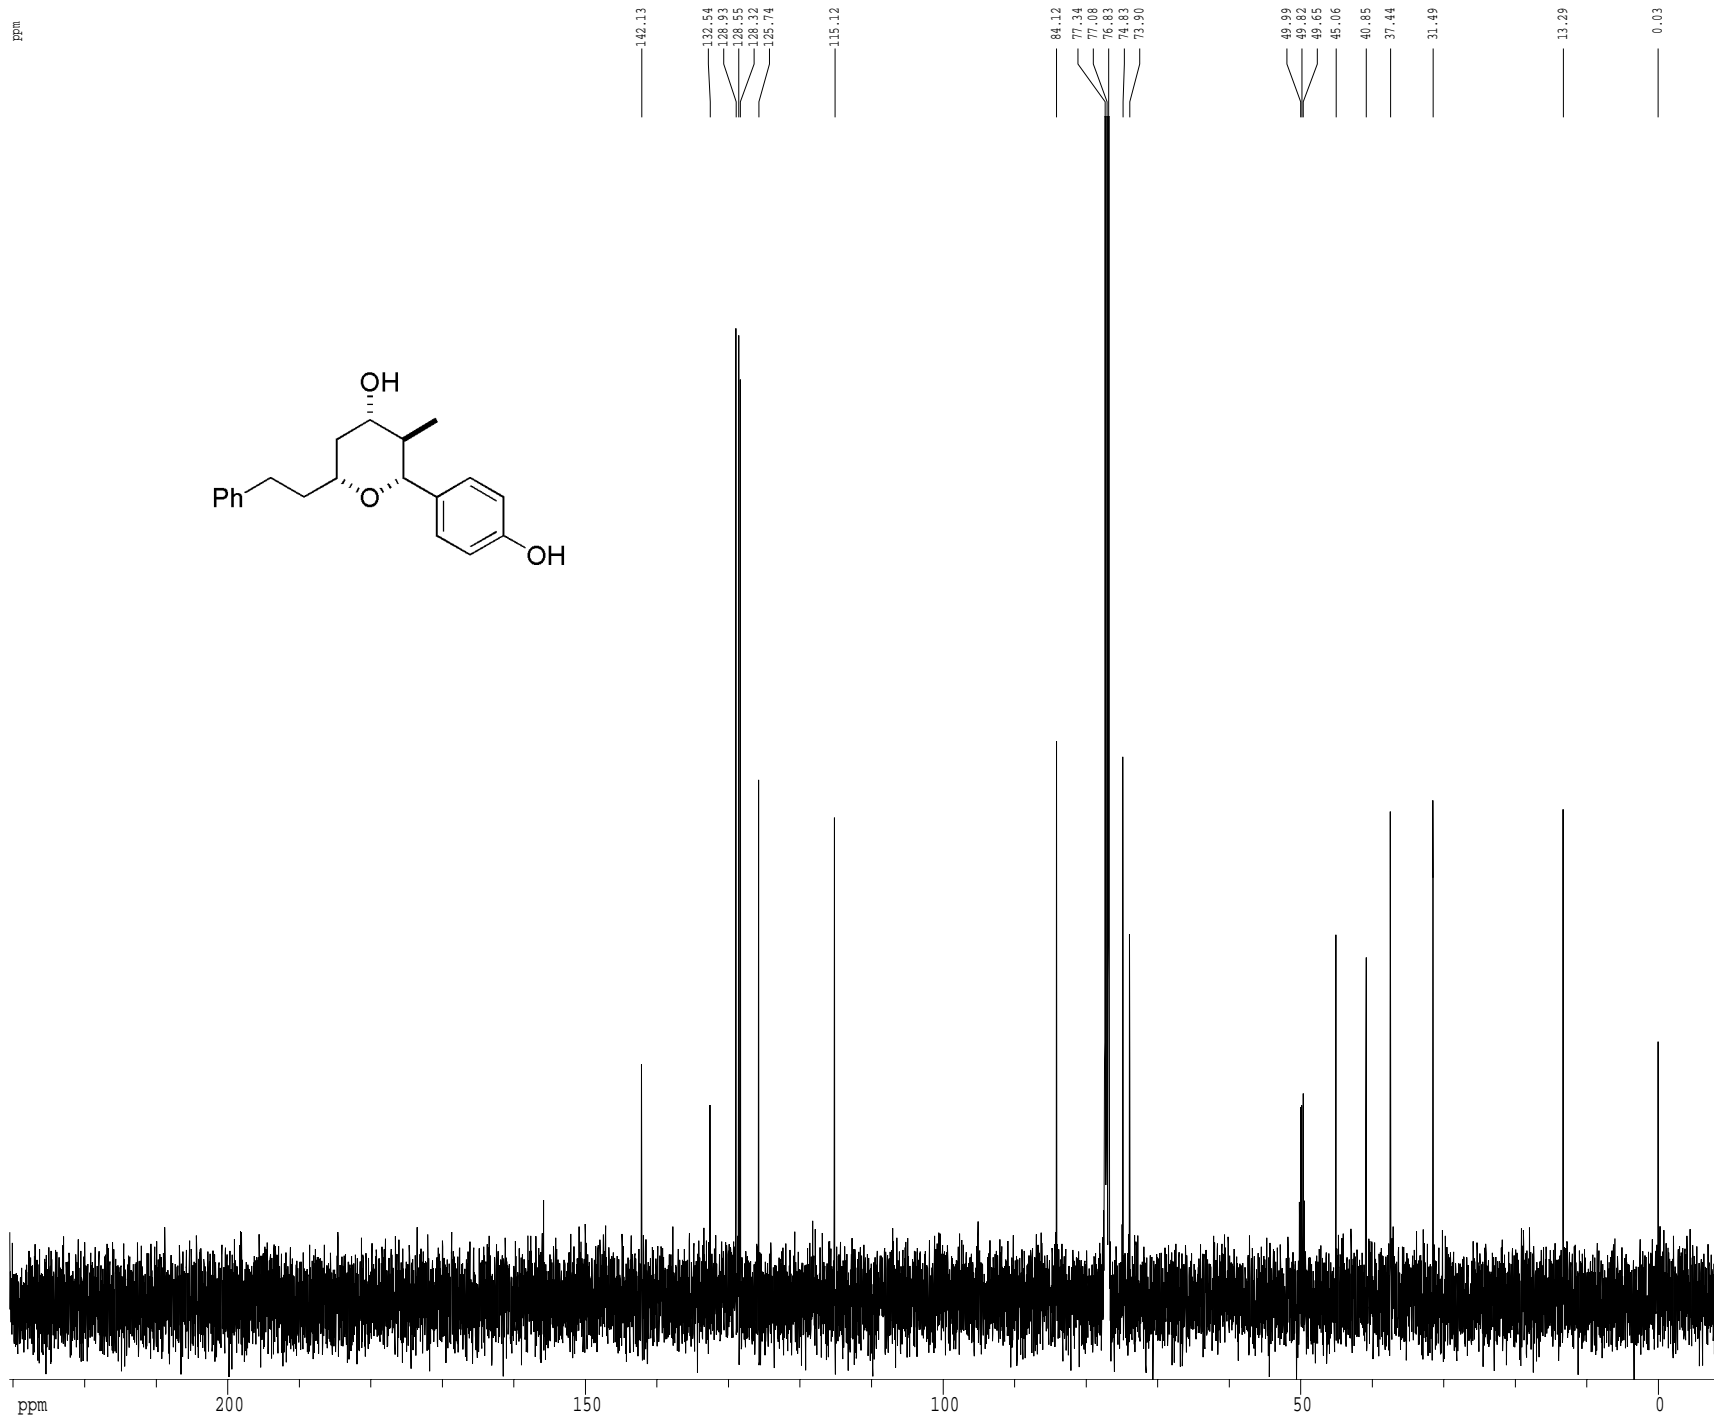

Current Data Parameters  
 USER tadpet  
 NAME KT-2-258  
 EXPNO 2  
 PROCNO 1

F2 - Acquisition Parameters  
 Date\_ 20080421  
 Time 10.56  
 INSTRUM cryo500  
 PROBHD 5 mm CPTCI 1H-  
 PULPROG zgdc30  
 TD 65418  
 SOLVENT CDC13  
 NS 271  
 DS 4  
 SWH 30303.031 Hz  
 FIDRES 0.463222 Hz  
 AQ 1.0794470 sec  
 RG 13004  
 DN 16.500 usec  
 DE 6.00 usec  
 TE 298.0 K  
 D1 0.25000000 sec  
 d11 0.03000000 sec  
 MCREST 0.00000000 sec  
 MCWREX 0.01500000 sec

===== CHANNEL f1 =====  
 NUC1 13C  
 P1 14.75 usec  
 PL1 -1.00 dB  
 SF01 125.7942548 MHz

===== CHANNEL f2 =====  
 CPDPRG2 waltz16  
 NUC2 1H  
 PCPD2 100.00 usec  
 PL2 1.60 dB  
 PL12 24.80 dB  
 SF02 500.2225011 MHz

F2 - Processing parameters  
 SI 65536  
 SF 125.7804190 MHz  
 WDW EM  
 SSB 0  
 LB 1.00 Hz  
 GB 0  
 PC 2.00

ID NMR plot parameters  
 CX 22.80 cm  
 CY 127.60 cm  
 F1P 230.637 ppm  
 F1 29009.68 Hz  
 F2P -10.287 ppm  
 F2 -1293.96 Hz  
 PPMCM 10.56688 ppm/cm  
 HZCM 1329.10706 Hz/cm

<sup>1</sup>H spectrum

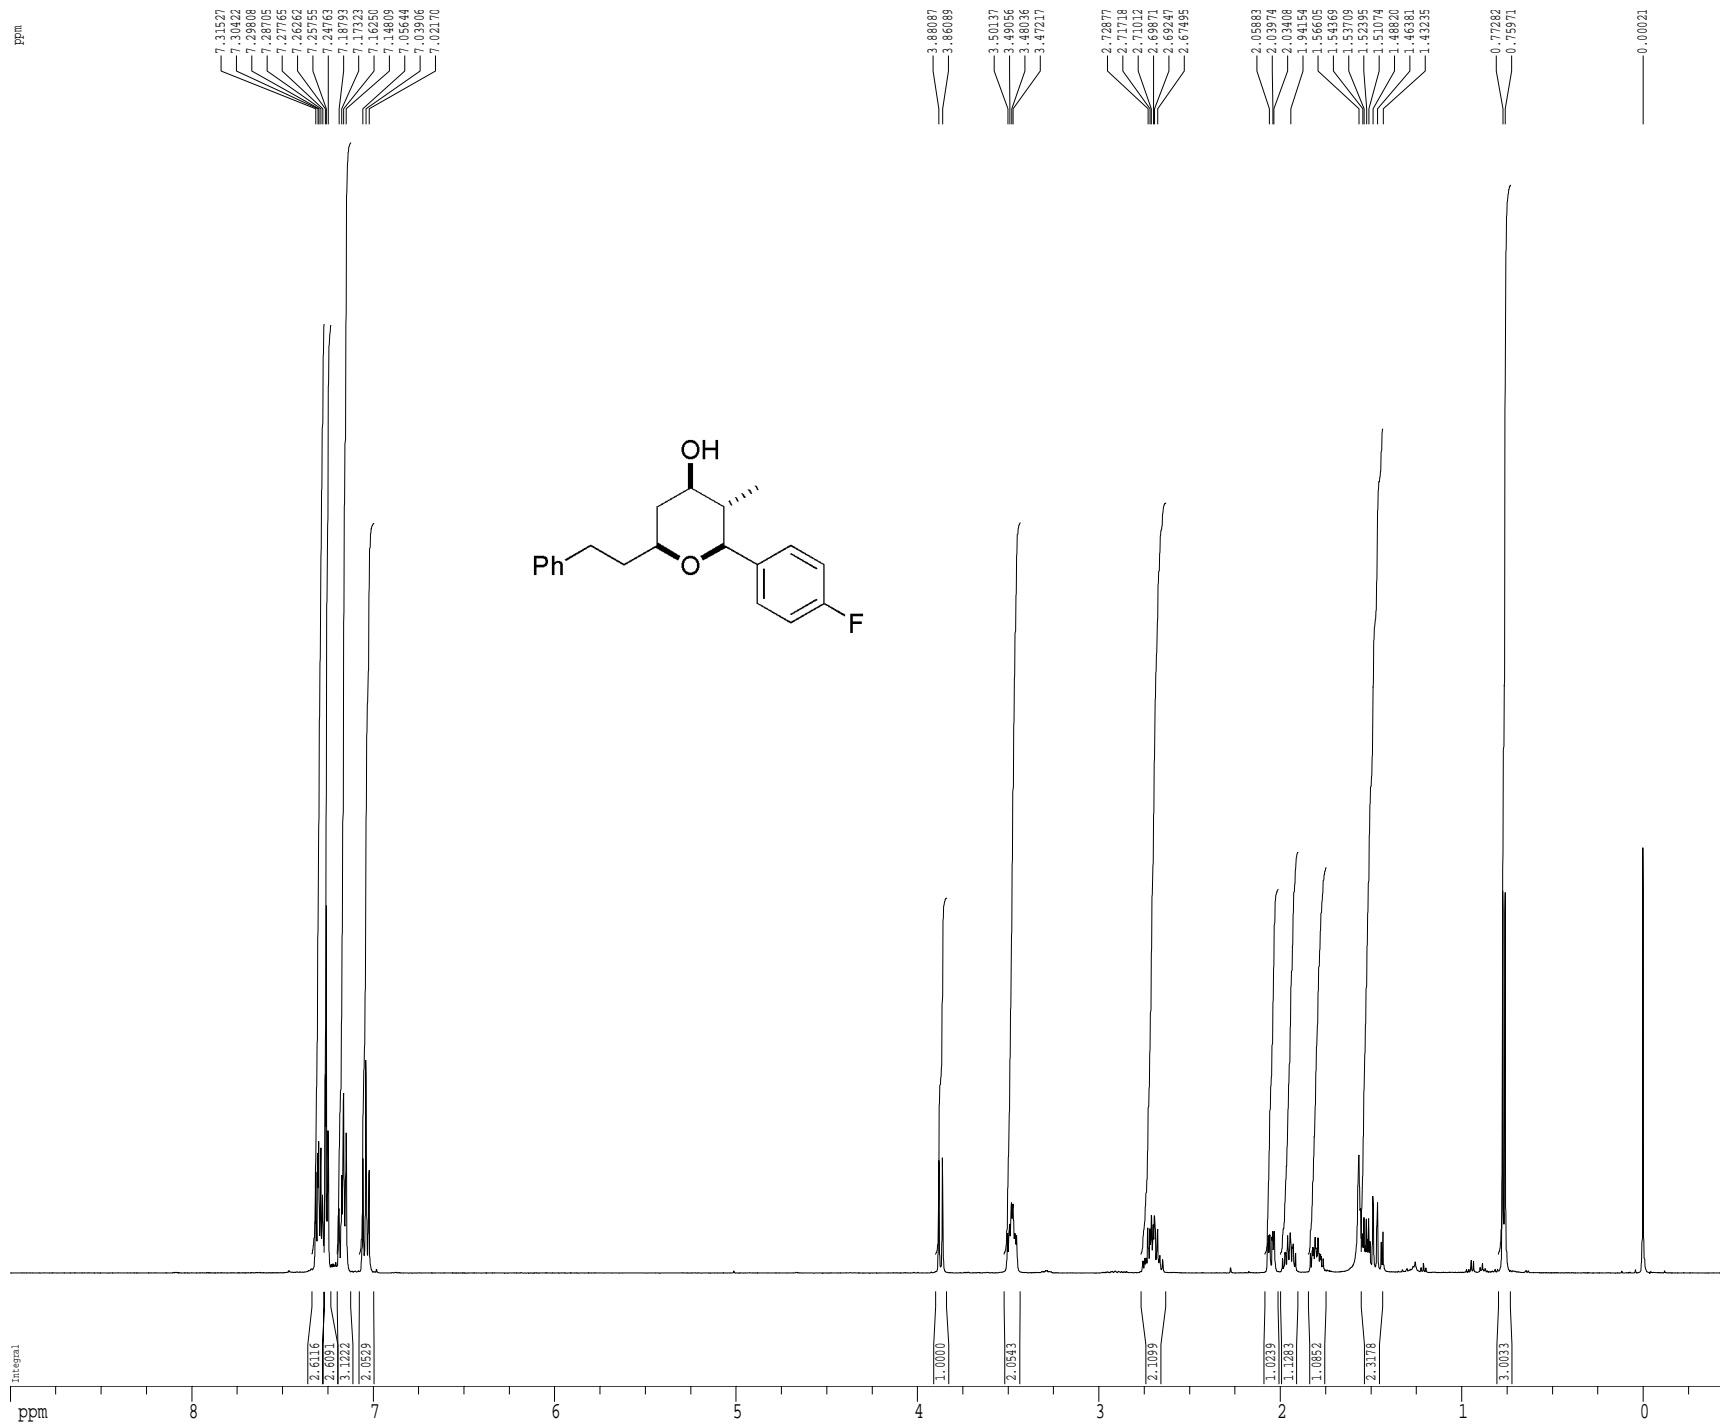

```

Current Data Parameters
USER          tadpet
NAME          KT-2-260
EXPNO        1
PROCNO       1

F2 - Acquisition Parameters
Date_        20080424
Time         18.03
INSTRUM      cryo500
PROBHD       5 mm CPTCI 1H-
PULPROG      zg30
TD           81728
SOLVENT      CDCl3T
NS           8
DS           2
SWH          8012.820 Hz
FIDRES       0.098043 Hz
AQ           5.0998774 sec
RG           7.1
DW           62.400 usec
DE           6.00 usec
TE           298.0 K
DL           0.10000000 sec
MCREST       0.00000000 sec
MCWRX        0.01500000 sec

===== CHANNEL f1 =====
NUC1         1H
P1           7.38 usec
PL1          1.60 dB
SF01         500.2235015 MHz

F2 - Processing parameters
SI           65536
SF           500.2200322 MHz
WDW          EM
SSB          0
LB           0.30 Hz
GB           0
PC           4.00

1D NMR plot parameters
CX           22.80 cm
CY           5.63 cm
F1P          9.000 ppm
F1           4501.98 Hz
F2P          -0.500 ppm
F2           -250.11 Hz
PPMCM        0.41667 ppm/cm
HZCM         208.42502 Hz/cm
    
```

<sup>13</sup>C spectrum with <sup>1</sup>H decoupling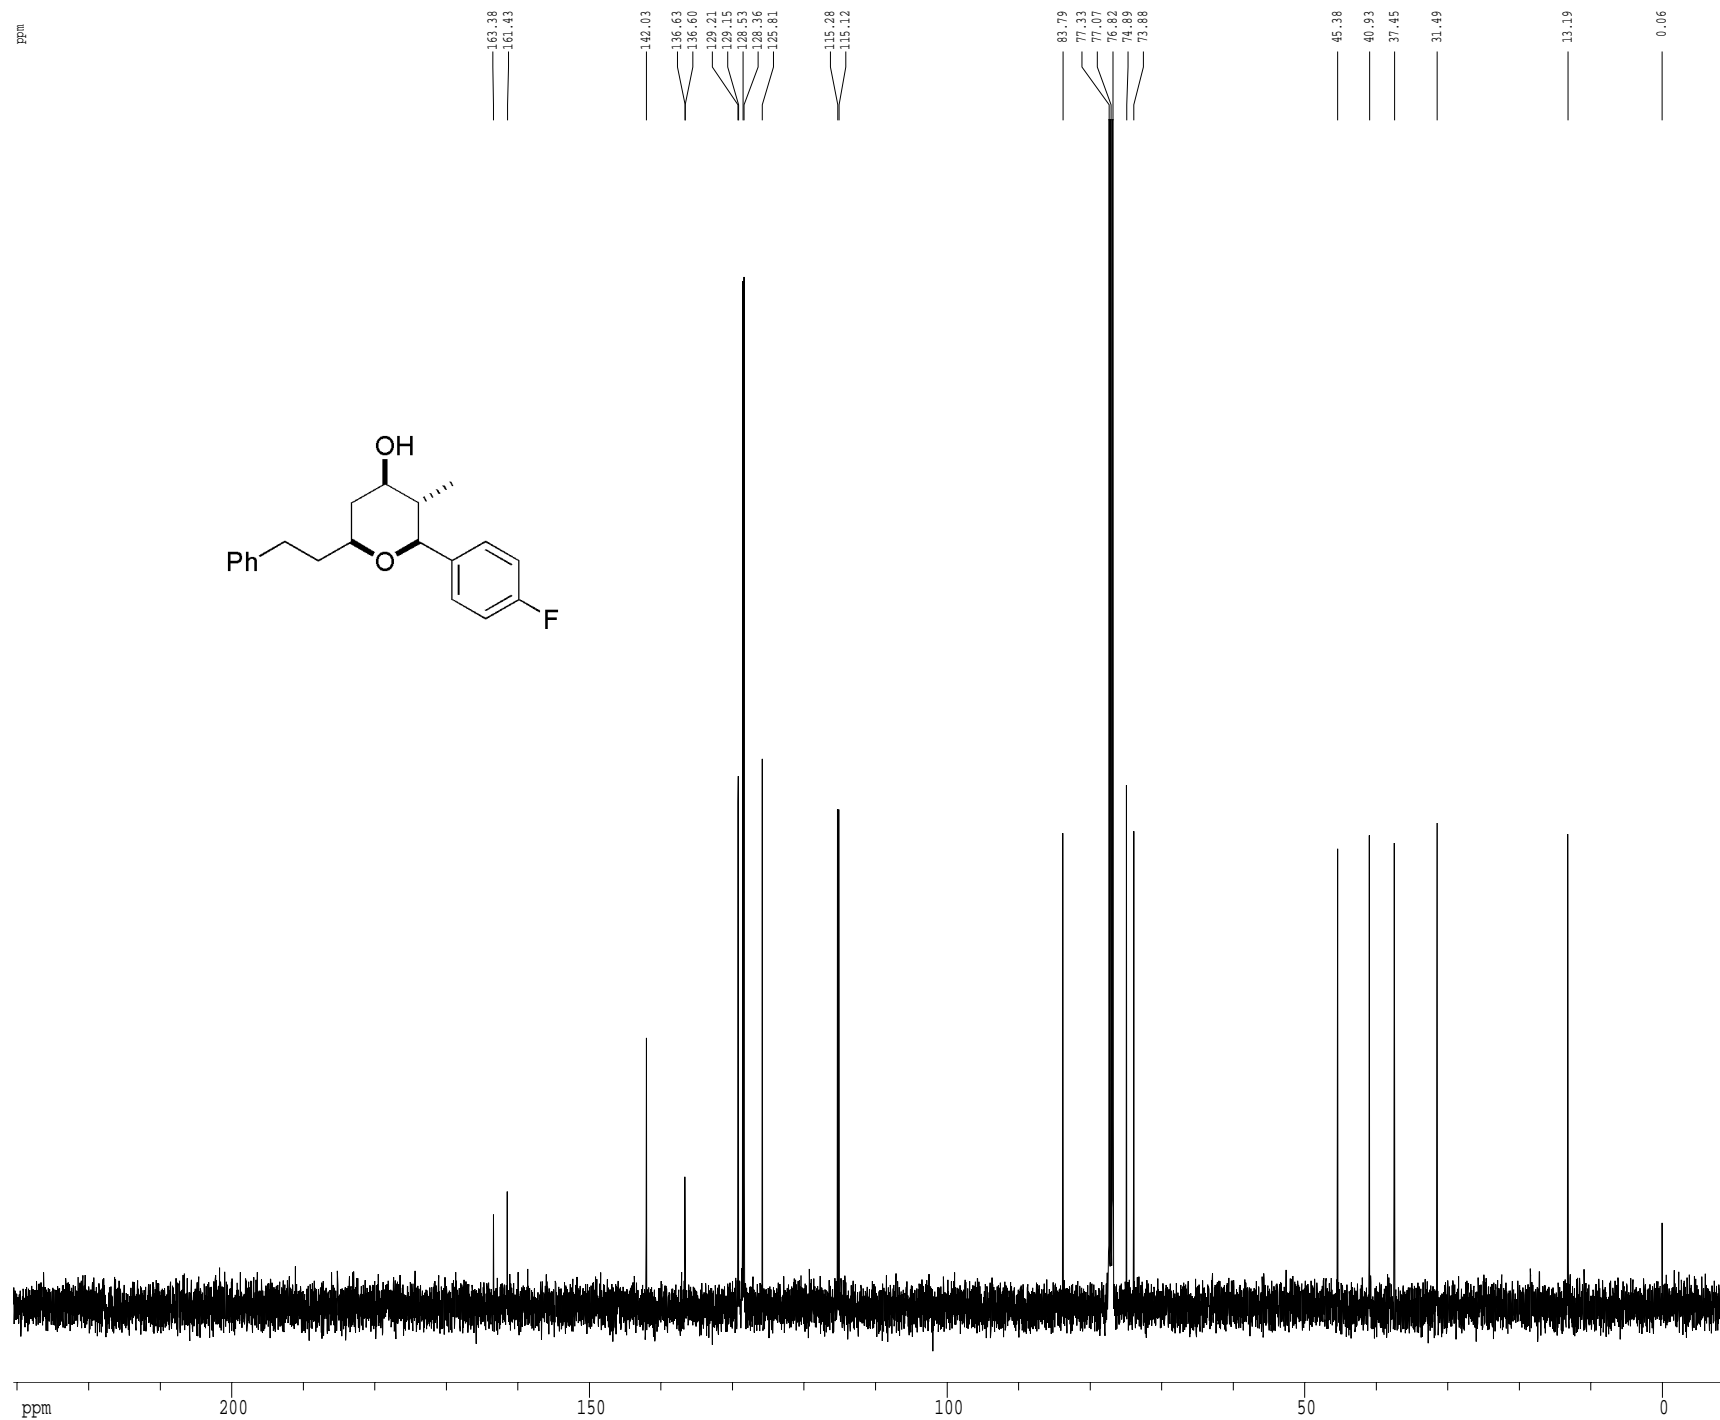

Current Data Parameters  
 USER tadpet  
 NAME KT-2-260  
 EXPNO 2  
 PROCNO 1

F2 - Acquisition Parameters  
 Date\_ 20080424  
 Time 18.08  
 INSTRUM cryo500  
 PROBHD 5 mm CPTCI 1H-  
 PULPROG zgdc30  
 TD 65418  
 SOLVENT CDC13  
 NS 165  
 DS 4  
 SWH 30303.031 Hz  
 FIDRES 0.463222 Hz  
 AQ 1.0794470 sec  
 RG 13004  
 DN 16.500 usec  
 DE 6.00 usec  
 TE 298.0 K  
 D1 0.25000000 sec  
 d11 0.03000000 sec  
 MCREST 0.00000000 sec  
 MCWRK 0.01500000 sec

===== CHANNEL f1 =====  
 NUC1 13C  
 P1 14.75 usec  
 PL1 -1.00 dB  
 SF01 125.7942548 MHz

===== CHANNEL f2 =====  
 CPDPRG2 waltz16  
 NUC2 1H  
 PCPD2 100.00 usec  
 PL2 1.60 dB  
 PL12 24.80 dB  
 SF02 500.2225011 MHz

F2 - Processing parameters  
 SI 65536  
 SF 125.7804190 MHz  
 WDW EM  
 SSB 0  
 LB 1.00 Hz  
 GB 0  
 PC 2.00

1D NMR plot parameters  
 CX 22.80 cm  
 CY 44.34 cm  
 F1P 230.637 ppm  
 F1 29009.68 Hz  
 F2P -10.287 ppm  
 F2 -1293.96 Hz  
 PPMCM 10.56688 ppm/cm  
 HZCM 1329.10706 Hz/cm

<sup>1</sup>H spectrum

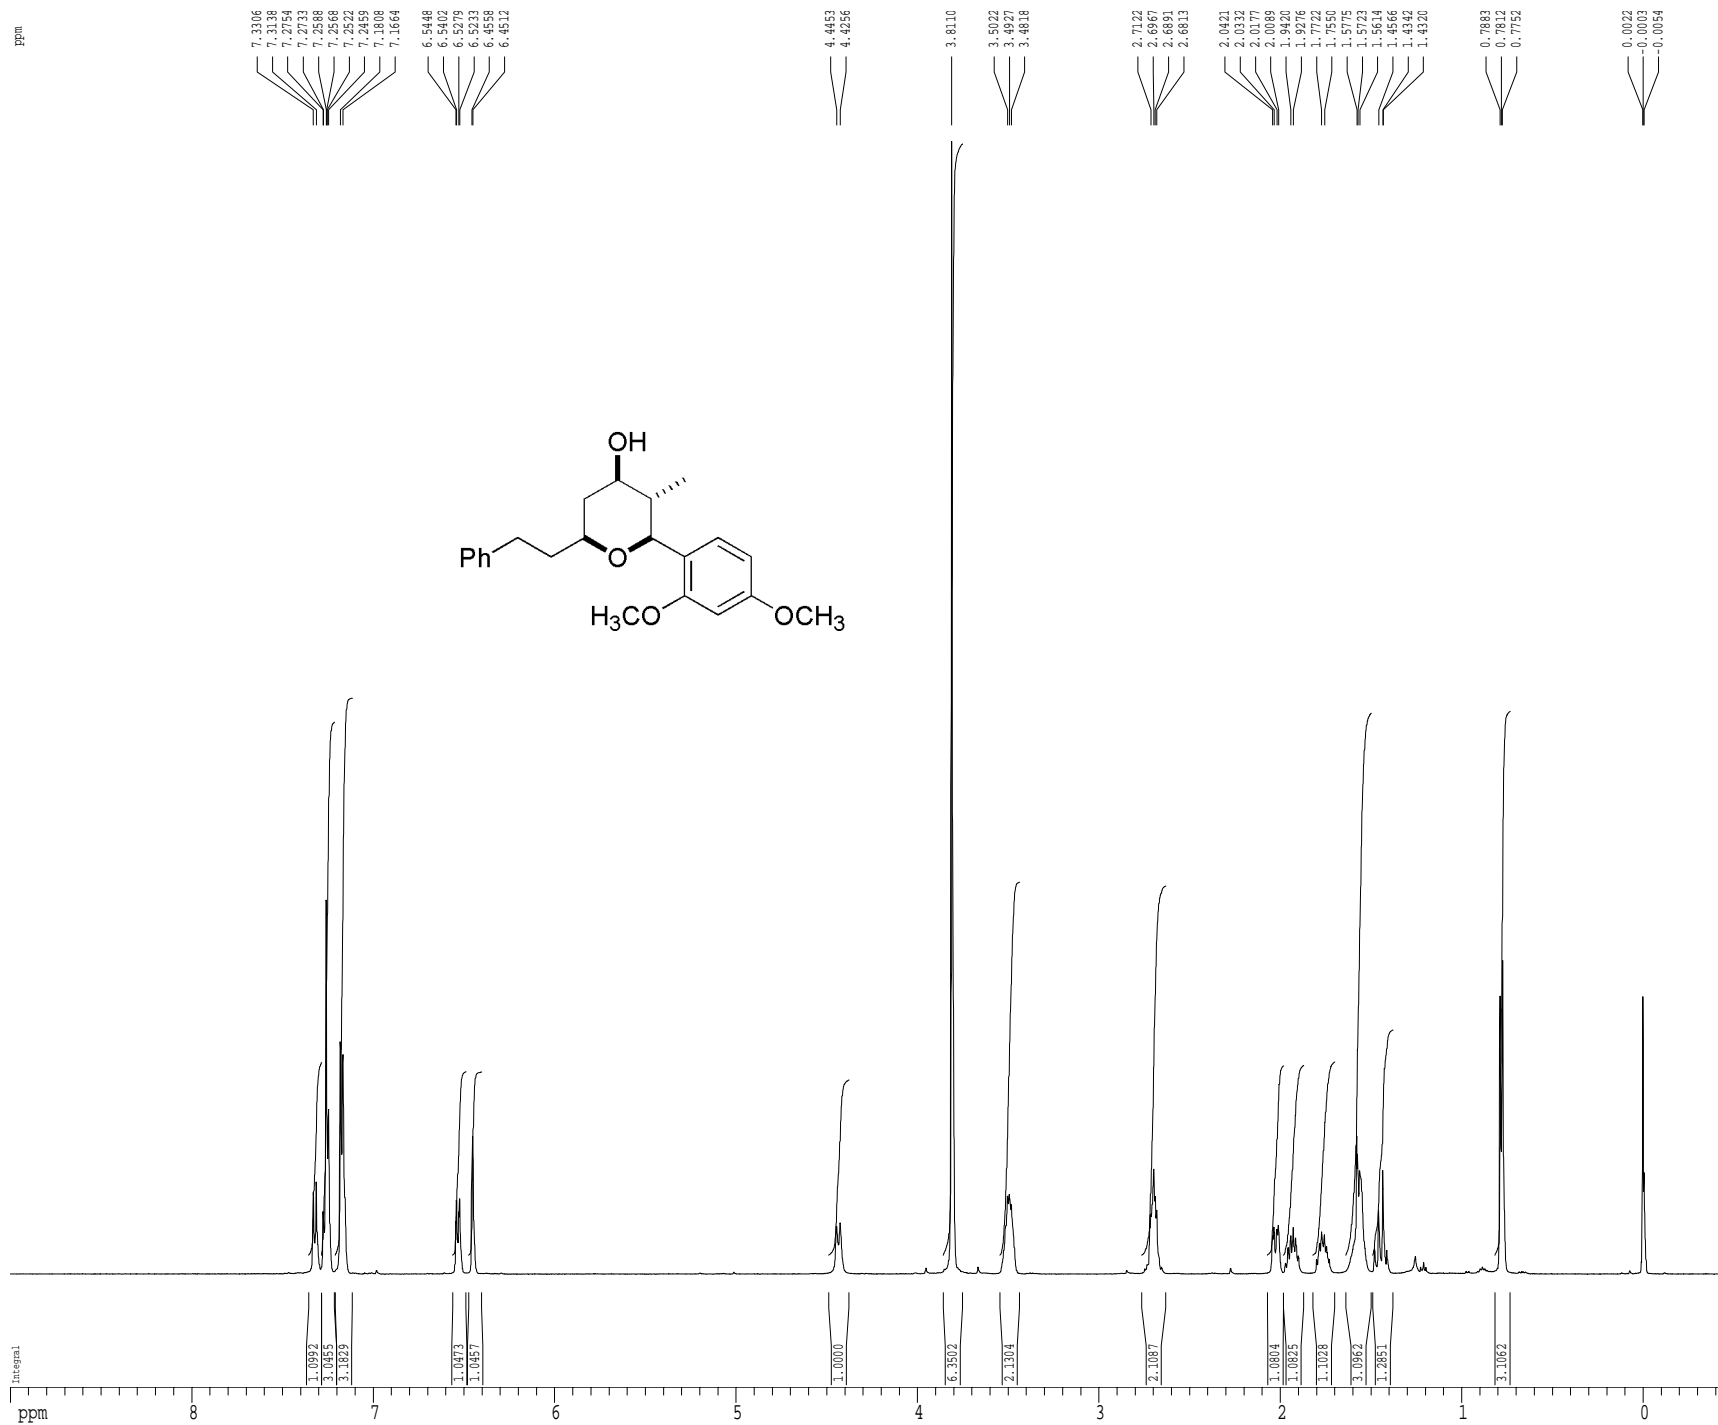

```

Current Data Parameters
USER          tadpet
NAME          KT-2-263
EXPNO         1
PROCNO        1

F2 - Acquisition Parameters
Date_         20080427
Time          16.26
INSTRUM       cryo500
PROBHD        5 mm CPTCI 1H-
PULPROG       zg30
TD             81728
SOLVENT       CDCl3T
NS             8
DS             2
SWH            8012.820 Hz
FIDRES         0.098043 Hz
AQ             5.0998774 sec
RG             8
DW             62.400 usec
DE             6.00 usec
TE             298.0 K
DL             0.10000000 sec
MCREST        0.00000000 sec
MCWRX         0.01500000 sec

===== CHANNEL f1 =====
NUC1           1H
P1             7.38 usec
PL1            1.60 dB
SF01           500.2235015 MHz

F2 - Processing parameters
SI             65536
SF             500.2200320 MHz
WDW            EM
SSB            0
LB             0.30 Hz
GB             0
PC             4.00

1D NMR plot parameters
CX             22.80 cm
CY             15.00 cm
F1P            9.000 ppm
F1             4501.98 Hz
F2P            -0.500 ppm
F2             -250.11 Hz
PPMCM         0.41667 ppm/cm
HZCM           208.42502 Hz/cm
    
```

13C spectrum with 1H decoupling

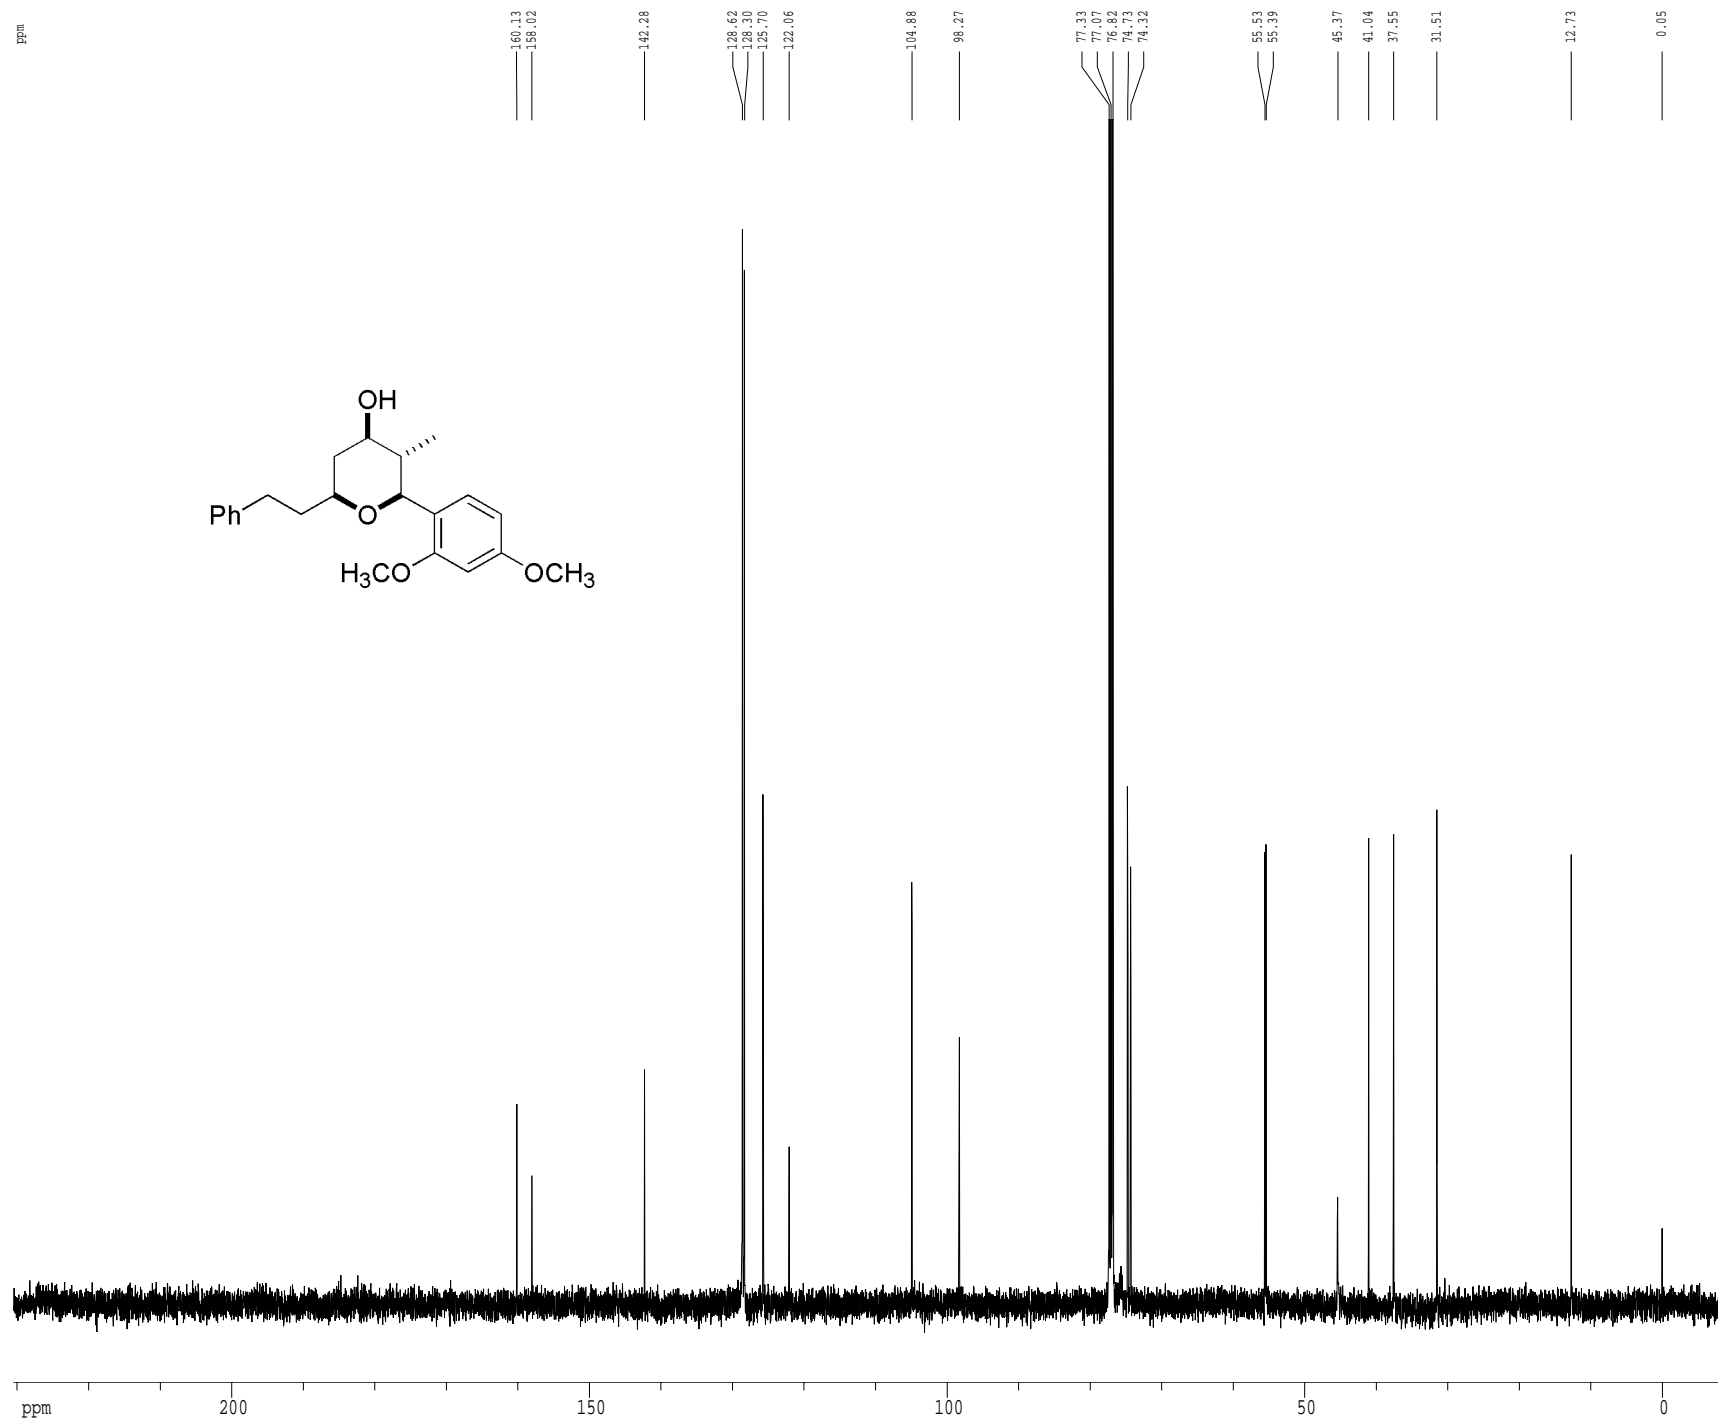

Current Data Parameters  
 USER tadpet  
 NAME KT-2-263  
 EXPNO 2  
 PROCNO 1

F2 - Acquisition Parameters  
 Date\_ 20080427  
 Time 16.09  
 INSTRUM cryo500  
 PROBHD 5 mm CPTCI 1H-  
 PULPROG zgdc30  
 TD 65418  
 SOLVENT CDC13  
 NS 651  
 DS 4  
 SWH 30303.031 Hz  
 FIDRES 0.463222 Hz  
 AQ 1.0794470 sec  
 RG 11585.2  
 DW 16.500 usec  
 DE 6.00 usec  
 TE 298.0 K  
 D1 0.25000000 sec  
 d11 0.03000000 sec  
 MCREST 0.00000000 sec  
 MCWREK 0.01500000 sec

===== CHANNEL f1 =====  
 NUC1 13C  
 P1 14.75 usec  
 PL1 -1.00 dB  
 SF01 125.7942548 MHz

===== CHANNEL f2 =====  
 CPDPRG2 waltz16  
 NUC2 1H  
 PCPD2 100.00 usec  
 PL2 1.60 dB  
 PL12 24.80 dB  
 SF02 500.2225011 MHz

F2 - Processing parameters  
 SI 65536  
 SF 125.7804190 MHz  
 WDW EM  
 SSB 0  
 LB 1.00 Hz  
 GB 0  
 PC 2.00

ID NMR plot parameters  
 CX 22.80 cm  
 CY 41.95 cm  
 F1P 230.637 ppm  
 F1 29009.68 Hz  
 F2P -10.287 ppm  
 F2 -1293.96 Hz  
 PPMCM 10.56688 ppm/cm  
 HZCM 1329.10706 Hz/cm

## 1H spectrum

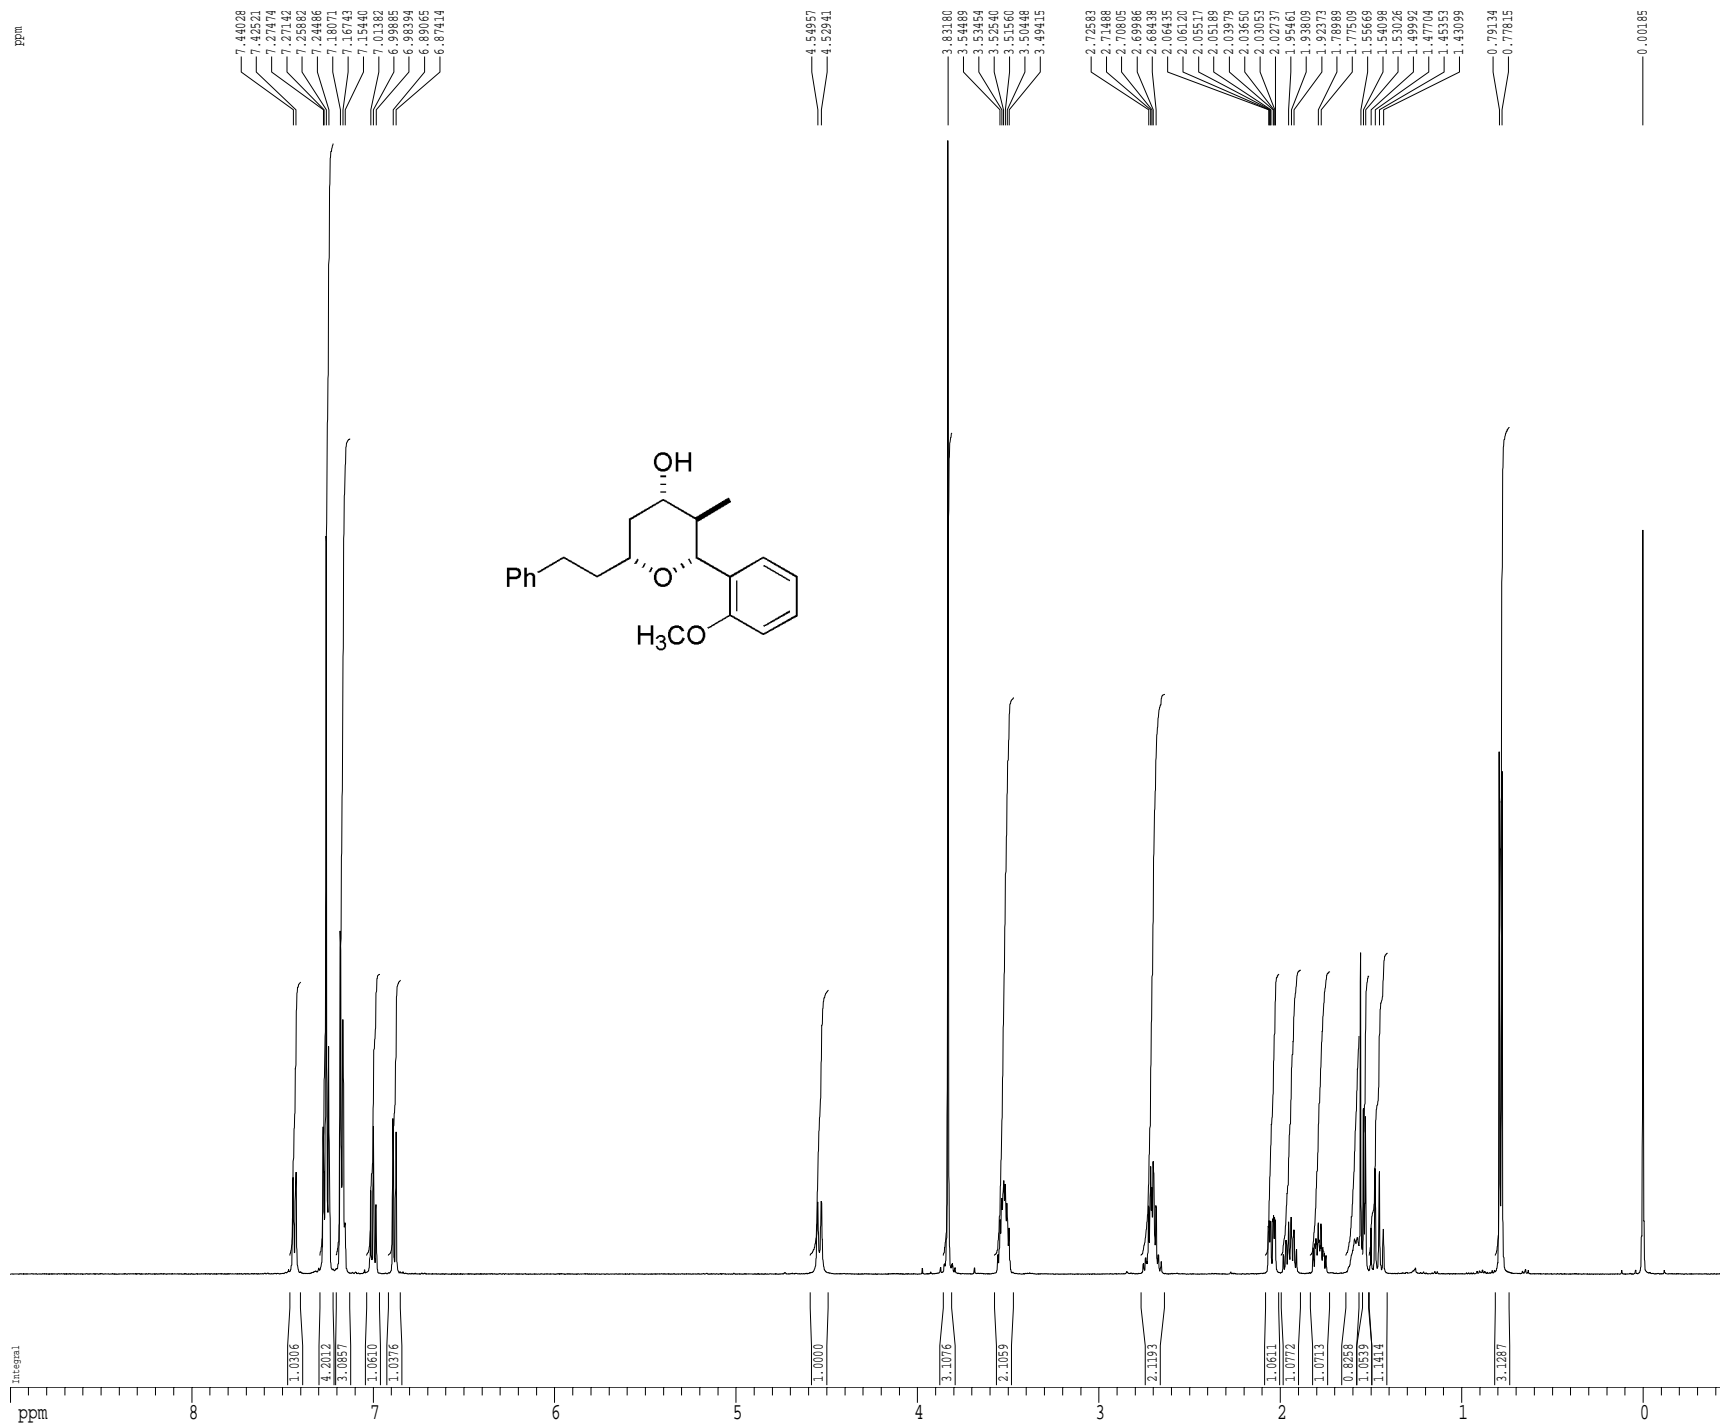

Current Data Parameters  
 USER tadpet  
 NAME KT-2-276  
 EXPNO 1  
 PROCNO 1

F2 - Acquisition Parameters  
 Date\_ 20080522  
 Time 15.02  
 INSTRUM cryo500  
 PROBHD 5 mm CPTCI 1H-  
 PULPROG zg30  
 TD 81728  
 SOLVENT CDCl3T  
 NS 8  
 DS 2  
 SWH 8012.820 Hz  
 FIDRES 0.098043 Hz  
 AQ 5.0998774 sec  
 RG 4.5  
 DW 62.400 usec  
 DE 6.00 usec  
 TE 298.0 K  
 DL 0.10000000 sec  
 MCREST 0.00000000 sec  
 MCWRR 0.01500000 sec

===== CHANNEL f1 =====  
 NUC1 1H  
 P1 7.38 usec  
 PL1 1.60 dB  
 SF01 500.2235015 MHz

F2 - Processing parameters  
 SI 65536  
 SF 500.2200319 MHz  
 WDW EM  
 SSB 0  
 LB 0.30 Hz  
 GB 0  
 PC 4.00

1D NMR plot parameters  
 CX 22.80 cm  
 CY 15.00 cm  
 F1P 9.000 ppm  
 F1 4501.98 Hz  
 F2P -0.500 ppm  
 F2 -250.11 Hz  
 PPMCM 0.41667 ppm/cm  
 HZCM 208.42502 Hz/cm

<sup>13</sup>C spectrum with <sup>1</sup>H decoupling

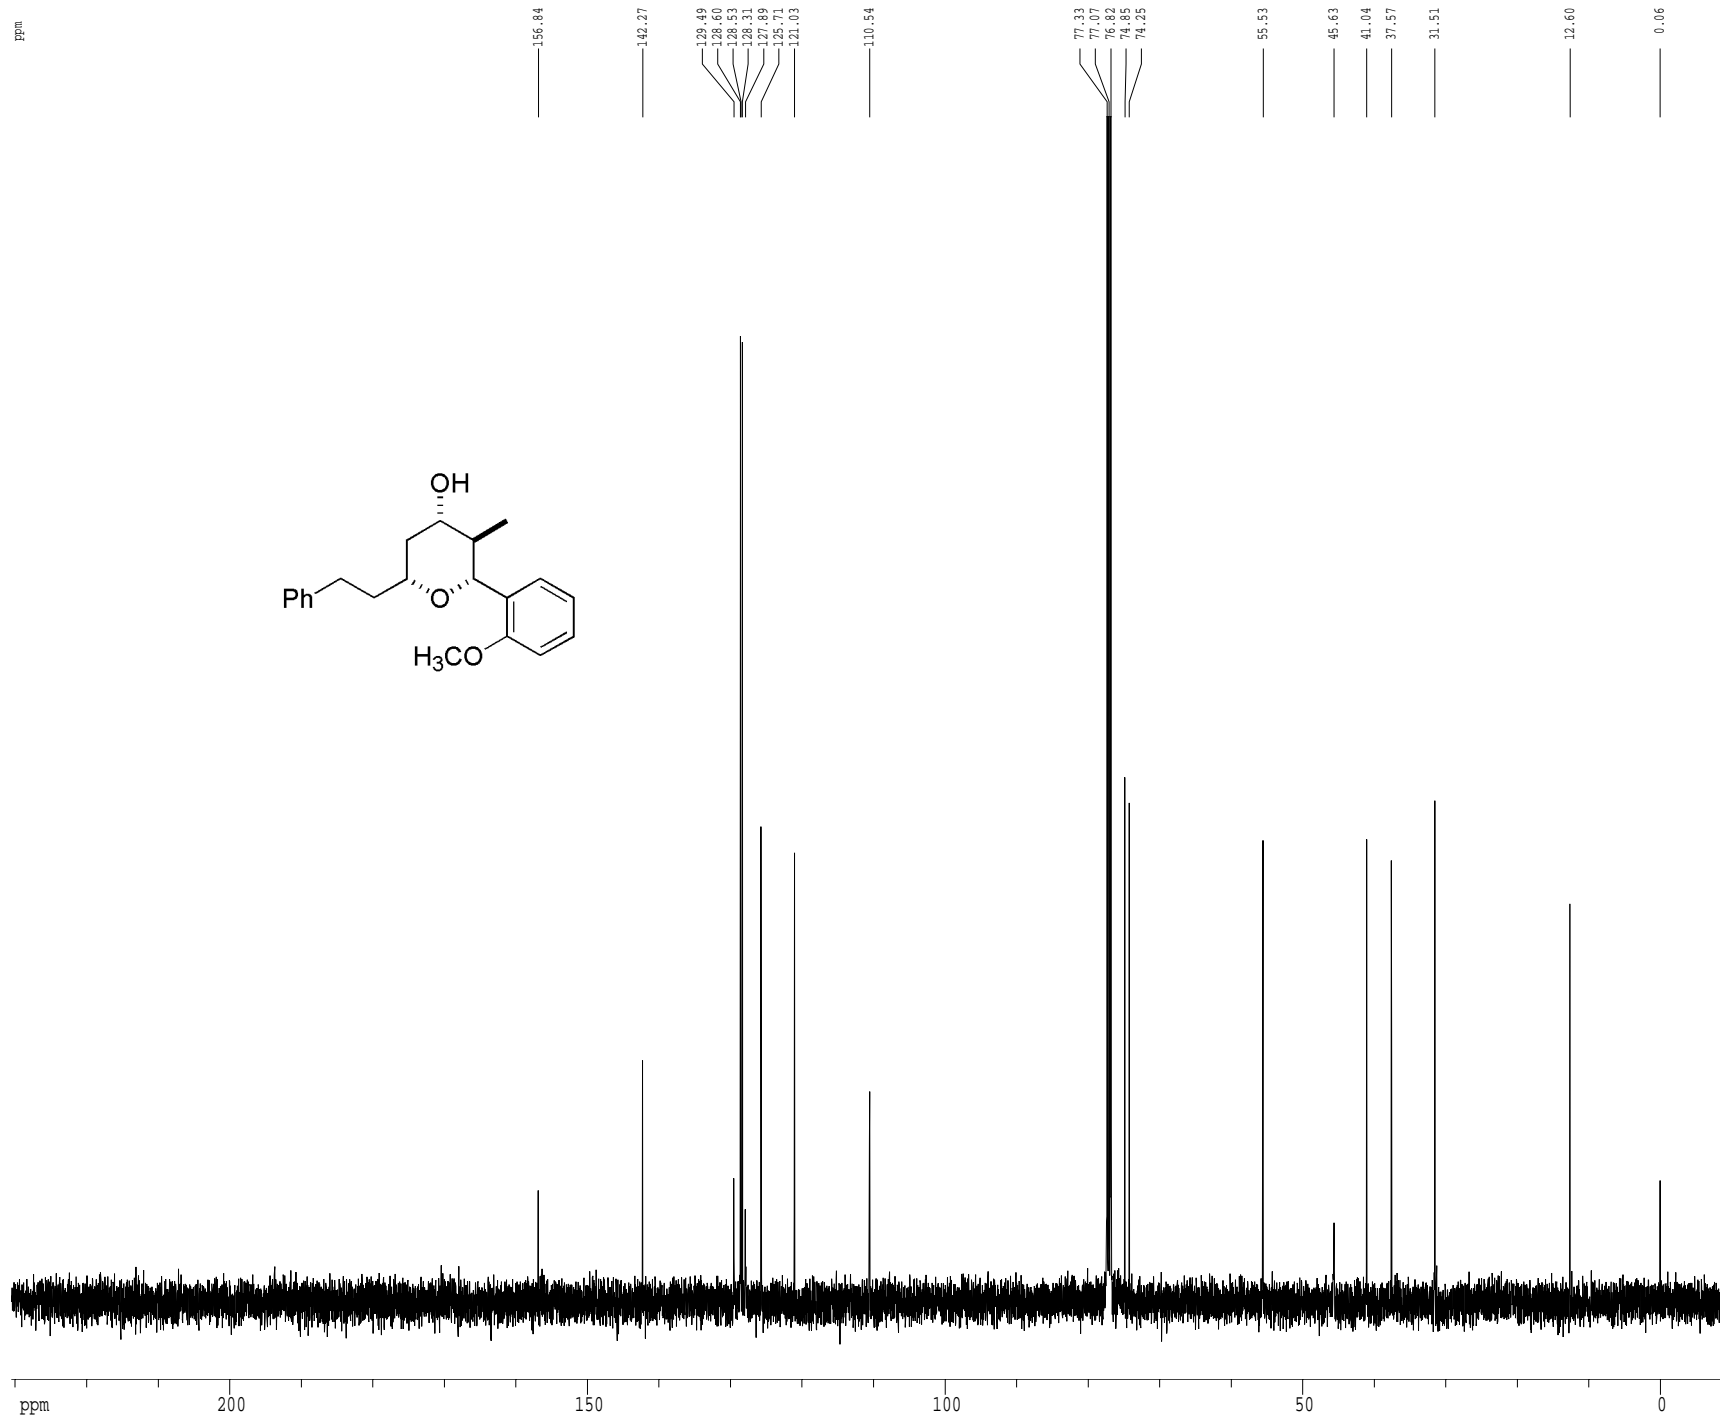

```

Current Data Parameters
USER      tadpet
NAME      KT-2-276
EXPNO     2
PROCNO    1

F2 - Acquisition Parameters
Date_     20080522
Time      15.06
INSTRUM   cryo500
PROBHD    5 mm CPTCI 1H-
PULPROG   zgdc30
TD         65418
SOLVENT   CDC13
NS         201
DS         4
SWH        30303.031 Hz
FIDRES     0.463222 Hz
AQ         1.0794470 sec
RG         13004
DN         16.500 usec
DE         6.00 usec
TE         298.0 K
D1         0.25000000 sec
d11        0.03000000 sec
MCREST     0.00000000 sec
MCWRK     0.01500000 sec

===== CHANNEL f1 =====
NUC1       13C
P1         14.75 usec
PL1        -1.00 dB
SF01       125.7942548 MHz

===== CHANNEL f2 =====
CPDPRG2    waltz16
NUC2        1H
PCPD2      100.00 usec
PL2         1.60 dB
PL12        24.80 dB
SF02        500.2225011 MHz

F2 - Processing parameters
SI          65536
SF          125.7804190 MHz
WDW         EM
SSB         0
LB          1.00 Hz
GB          0
PC          2.00

1D NMR plot parameters
CX          22.80 cm
CY          47.32 cm
F1P         230.637 ppm
F1          29009.68 Hz
F2P         -10.287 ppm
F2          -1293.96 Hz
PPMCM       10.56688 ppm/cm
HZCM        1329.10706 Hz/cm
    
```

<sup>1</sup>H spectrum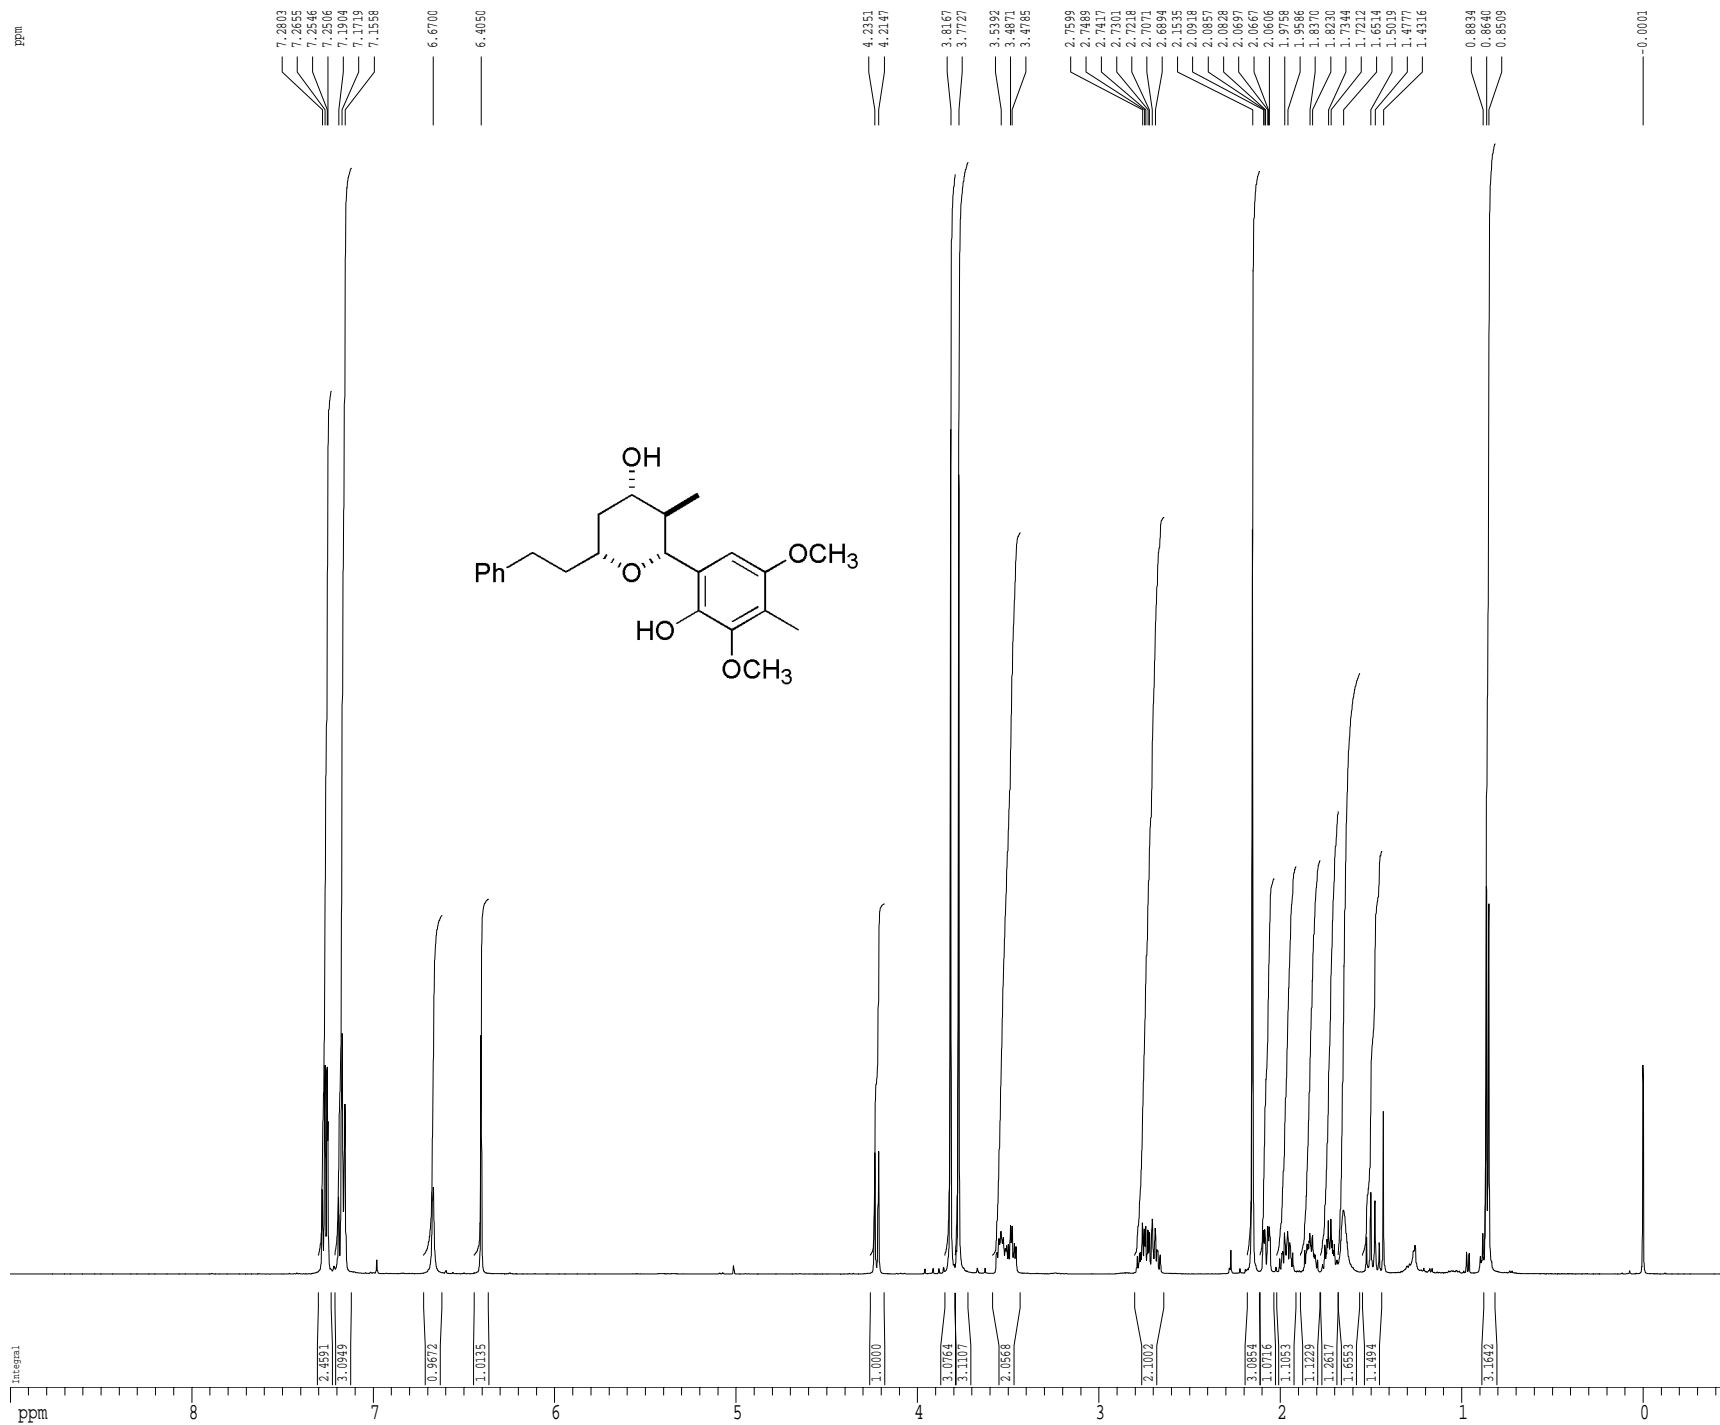

Current Data Parameters  
 USER tadpet  
 NAME KT-2-241  
 EXPNO 1  
 PROCNO 1

F2 - Acquisition Parameters  
 Date\_ 20080411  
 Time 16.26  
 INSTRUM cryo500  
 PROBHD 5 mm CPTCI 1H-  
 PULPROG zg30  
 TD 81728  
 SOLVENT CDCl3T  
 NS 8  
 DS 2  
 SWH 8012.820 Hz  
 FIDRES 0.098043 Hz  
 AQ 5.0998774 sec  
 RG 4  
 DW 62.400 usec  
 DE 6.00 usec  
 TE 298.0 K  
 DL 0.10000000 sec  
 MCREST 0.00000000 sec  
 MCWEX 0.01500000 sec

===== CHANNEL f1 =====  
 NUC1 1H  
 P1 7.38 usec  
 PL1 1.60 dB  
 SF01 500.2235015 MHz

F2 - Processing parameters  
 SI 65536  
 SF 500.2200333 MHz  
 WDW EM  
 SSB 0  
 LB 0.30 Hz  
 GB 0  
 PC 4.00

1D NMR plot parameters  
 CX 22.80 cm  
 CY 11.17 cm  
 F1P 9.000 ppm  
 F1 4501.98 Hz  
 F2P -0.500 ppm  
 F2 -250.11 Hz  
 PPMCM 0.41667 ppm/cm  
 HZCM 208.42502 Hz/cm



$^{13}\text{C}$  spectrum with  $^1\text{H}$  decoupling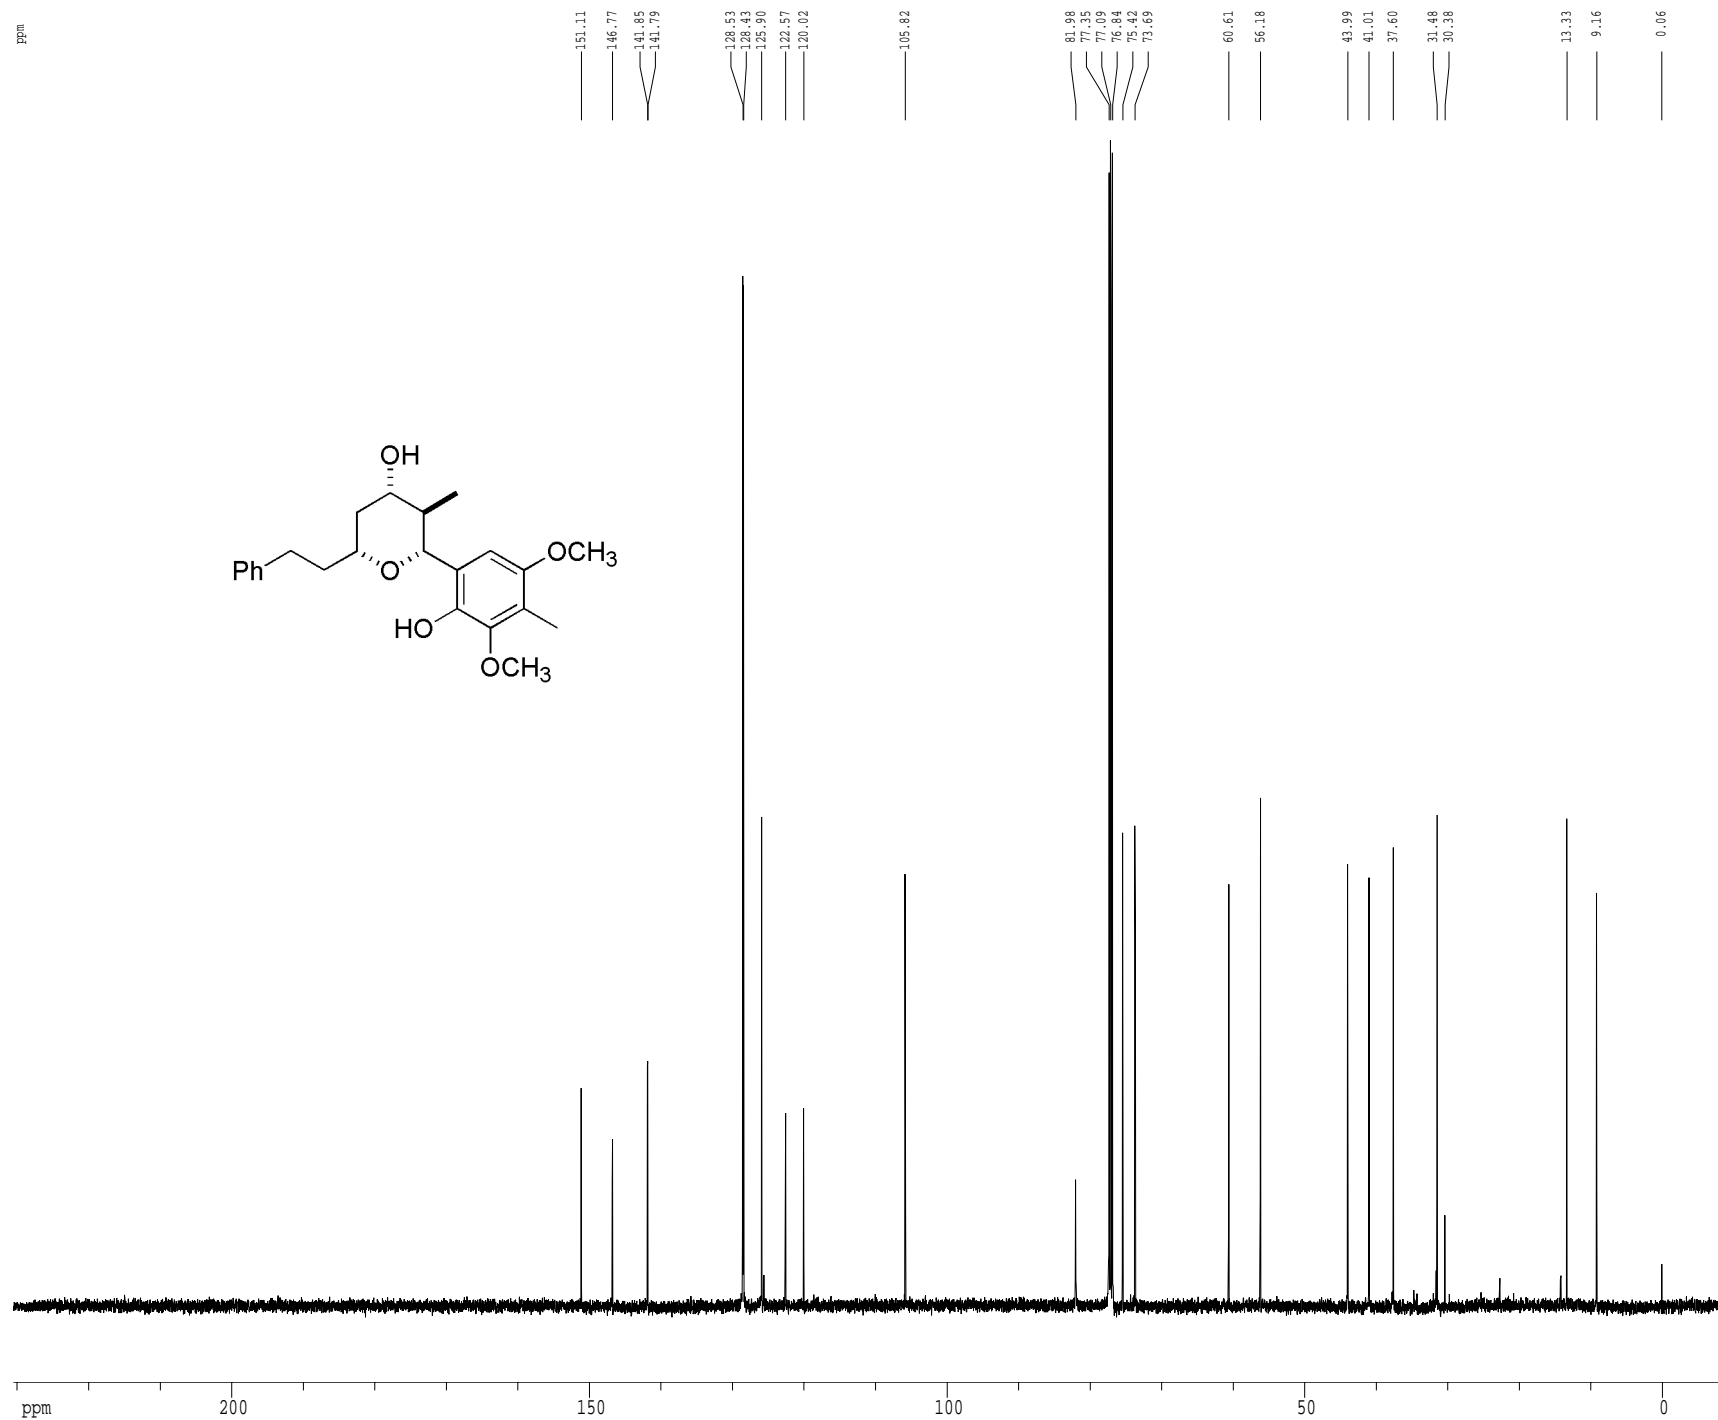

Current Data Parameters  
 USER tadpet  
 NAME KT-2-241  
 EXPNO 2  
 PROCNO 1

F2 - Acquisition Parameters  
 Date\_ 20080411  
 Time 16.32  
 INSTRUM cryo500  
 PROBHHD 5 mm CPTCI 1H-  
 PULPROG zgdc30  
 TD 65418  
 SOLVENT CDC13  
 NS 301  
 DS 4  
 SWH 30303.031 Hz  
 FIDRES 0.463222 Hz  
 AQ 1.0794470 sec  
 RG 11585.2  
 DW 16.500 usec  
 DE 6.00 usec  
 TE 298.0 K  
 D1 0.25000000 sec  
 d11 0.03000000 sec  
 MCREST 0.00000000 sec  
 MCWRK 0.01500000 sec

===== CHANNEL f1 =====  
 NUC1  $^{13}\text{C}$   
 P1 14.75 usec  
 PL1 -1.00 dB  
 SF01 125.7942548 MHz

===== CHANNEL f2 =====  
 CPDPRG2 waltz16  
 NUC2  $^1\text{H}$   
 PCPD2 100.00 usec  
 PL2 1.60 dB  
 PL12 24.80 dB  
 SF02 500.2225011 MHz

F2 - Processing parameters  
 SI 65536  
 SF 125.7804190 MHz  
 WDW EM  
 SSB 0  
 LB 1.00 Hz  
 GB 0  
 PC 2.00

ID NMR plot parameters  
 CX 22.80 cm  
 CY 15.65 cm  
 F1P 230.637 ppm  
 F1 29009.68 Hz  
 F2P -10.287 ppm  
 F2 -1293.96 Hz  
 PPMCM 10.56688 ppm/cm  
 HZCM 1329.10706 Hz/cm

<sup>1</sup>H spectrum

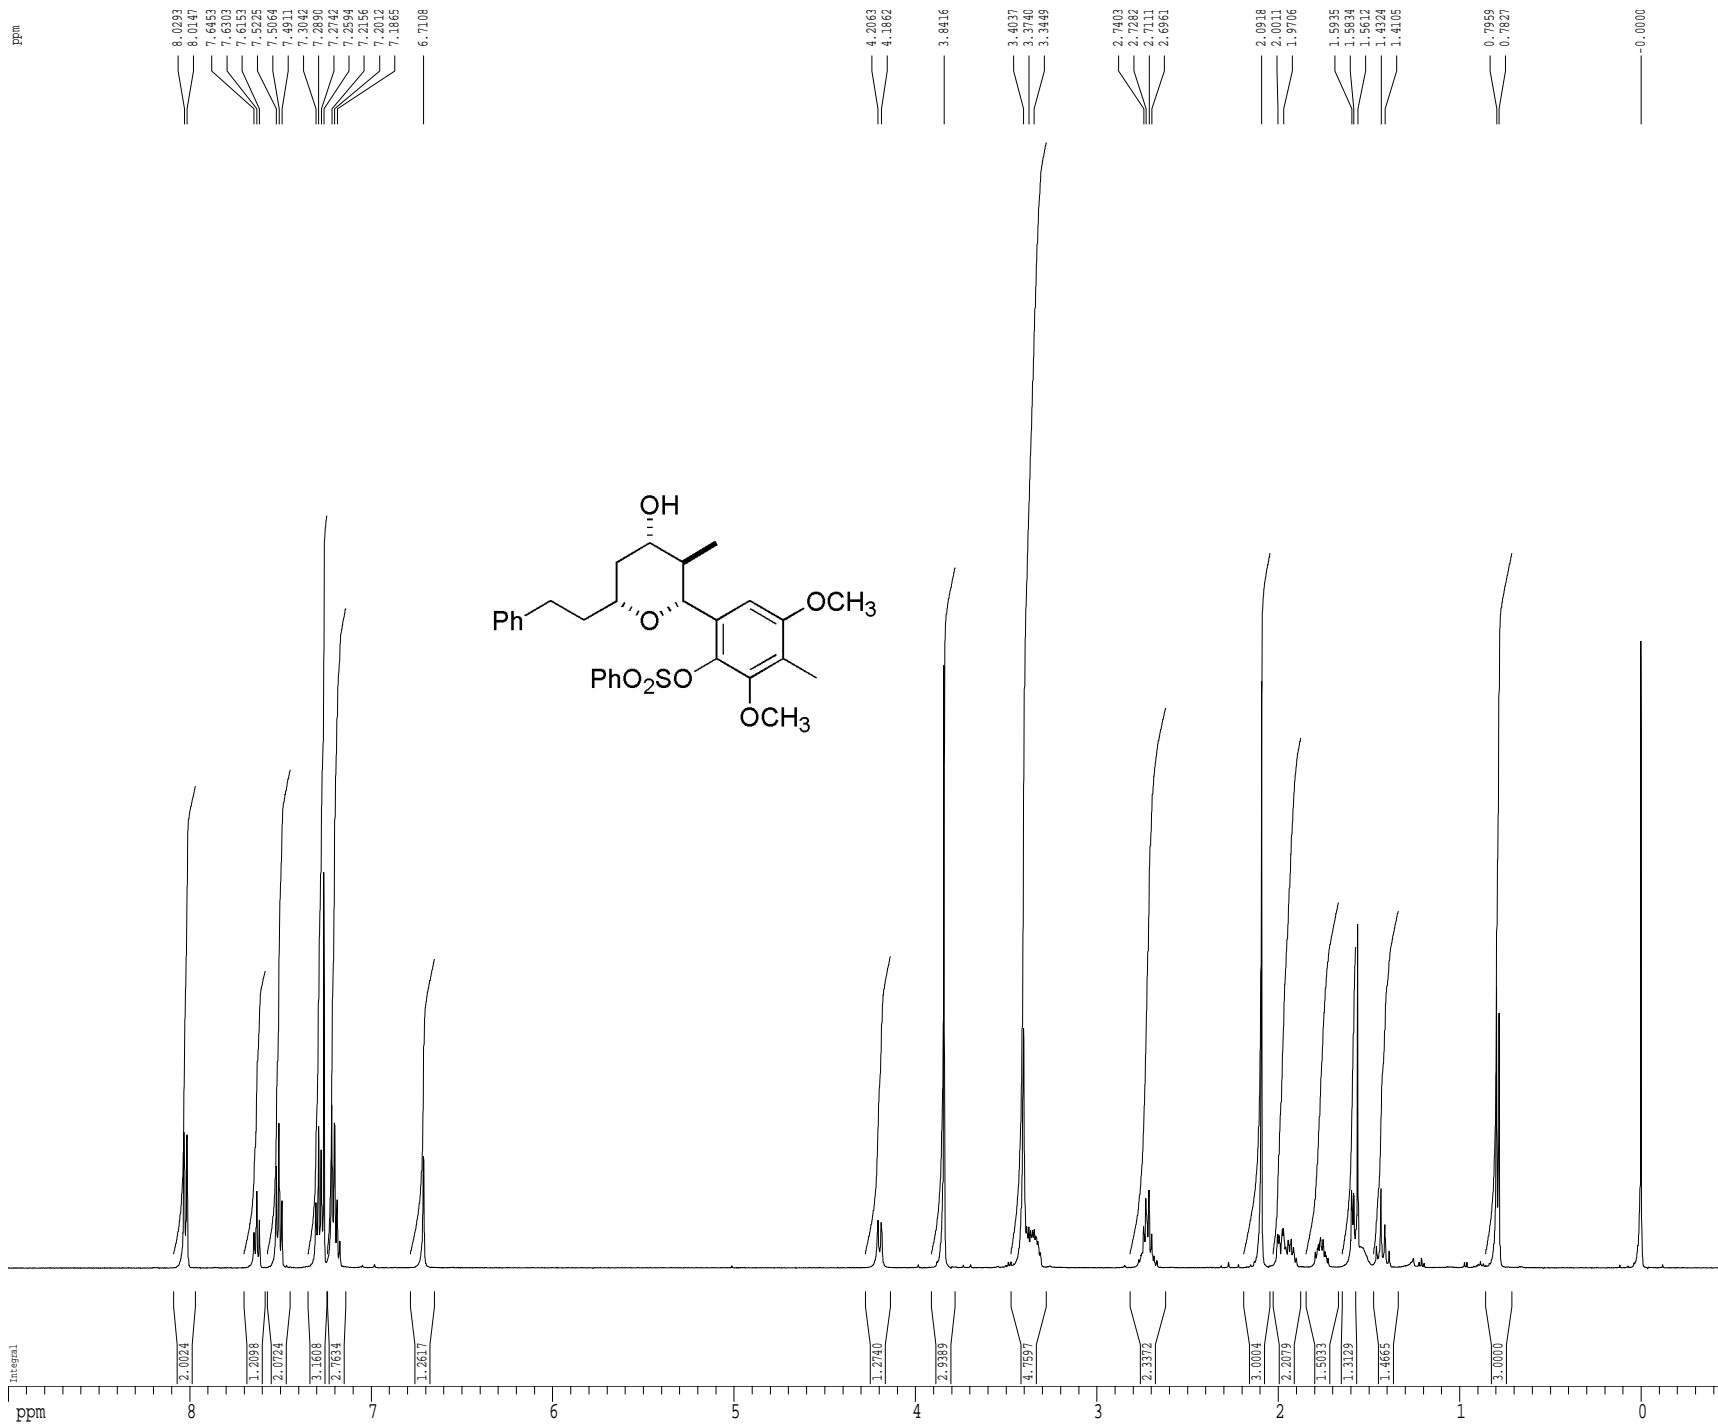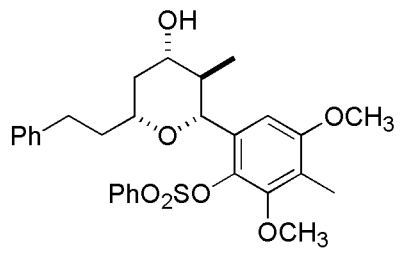

```

Current Data Parameters
USER          tadpet
NAME          KT-2-273
EXPNO        1
PROCNO       1

F2 - Acquisition Parameters
Date_        20080518
Time         19.27
INSTRUM      cryo500
PROBHD       5 mm CPTCI 1H-
PULPROG      zg30
TD           81728
SOLVENT      CDCl3T
NS           8
DS           2
SWH          8012.820 Hz
FIDRES       0.098043 Hz
AQ           5.0998774 sec
RG           6.3
DW           62.400 usec
DE           6.00 usec
TE           298.0 K
DL           0.10000000 sec
MCREST       0.00000000 sec
MCWRX        0.01500000 sec

===== CHANNEL f1 =====
NUC1         1H
P1           7.38 usec
PL1          1.60 dB
SF01         500.2235015 MHz

F2 - Processing parameters
SI           65536
SF           500.2200313 MHz
WDW          EM
SSB          0
LB           0.30 Hz
GB           0
PC           4.00

1D NMR plot parameters
CX           22.80 cm
CY           8.37 cm
F1P          9.000 ppm
F1           4501.98 Hz
F2P          -0.500 ppm
F2           -250.11 Hz
PPMCM        0.41667 ppm/cm
HZCM         208.42502 Hz/cm
    
```

<sup>13</sup>C spectrum with <sup>1</sup>H decoupling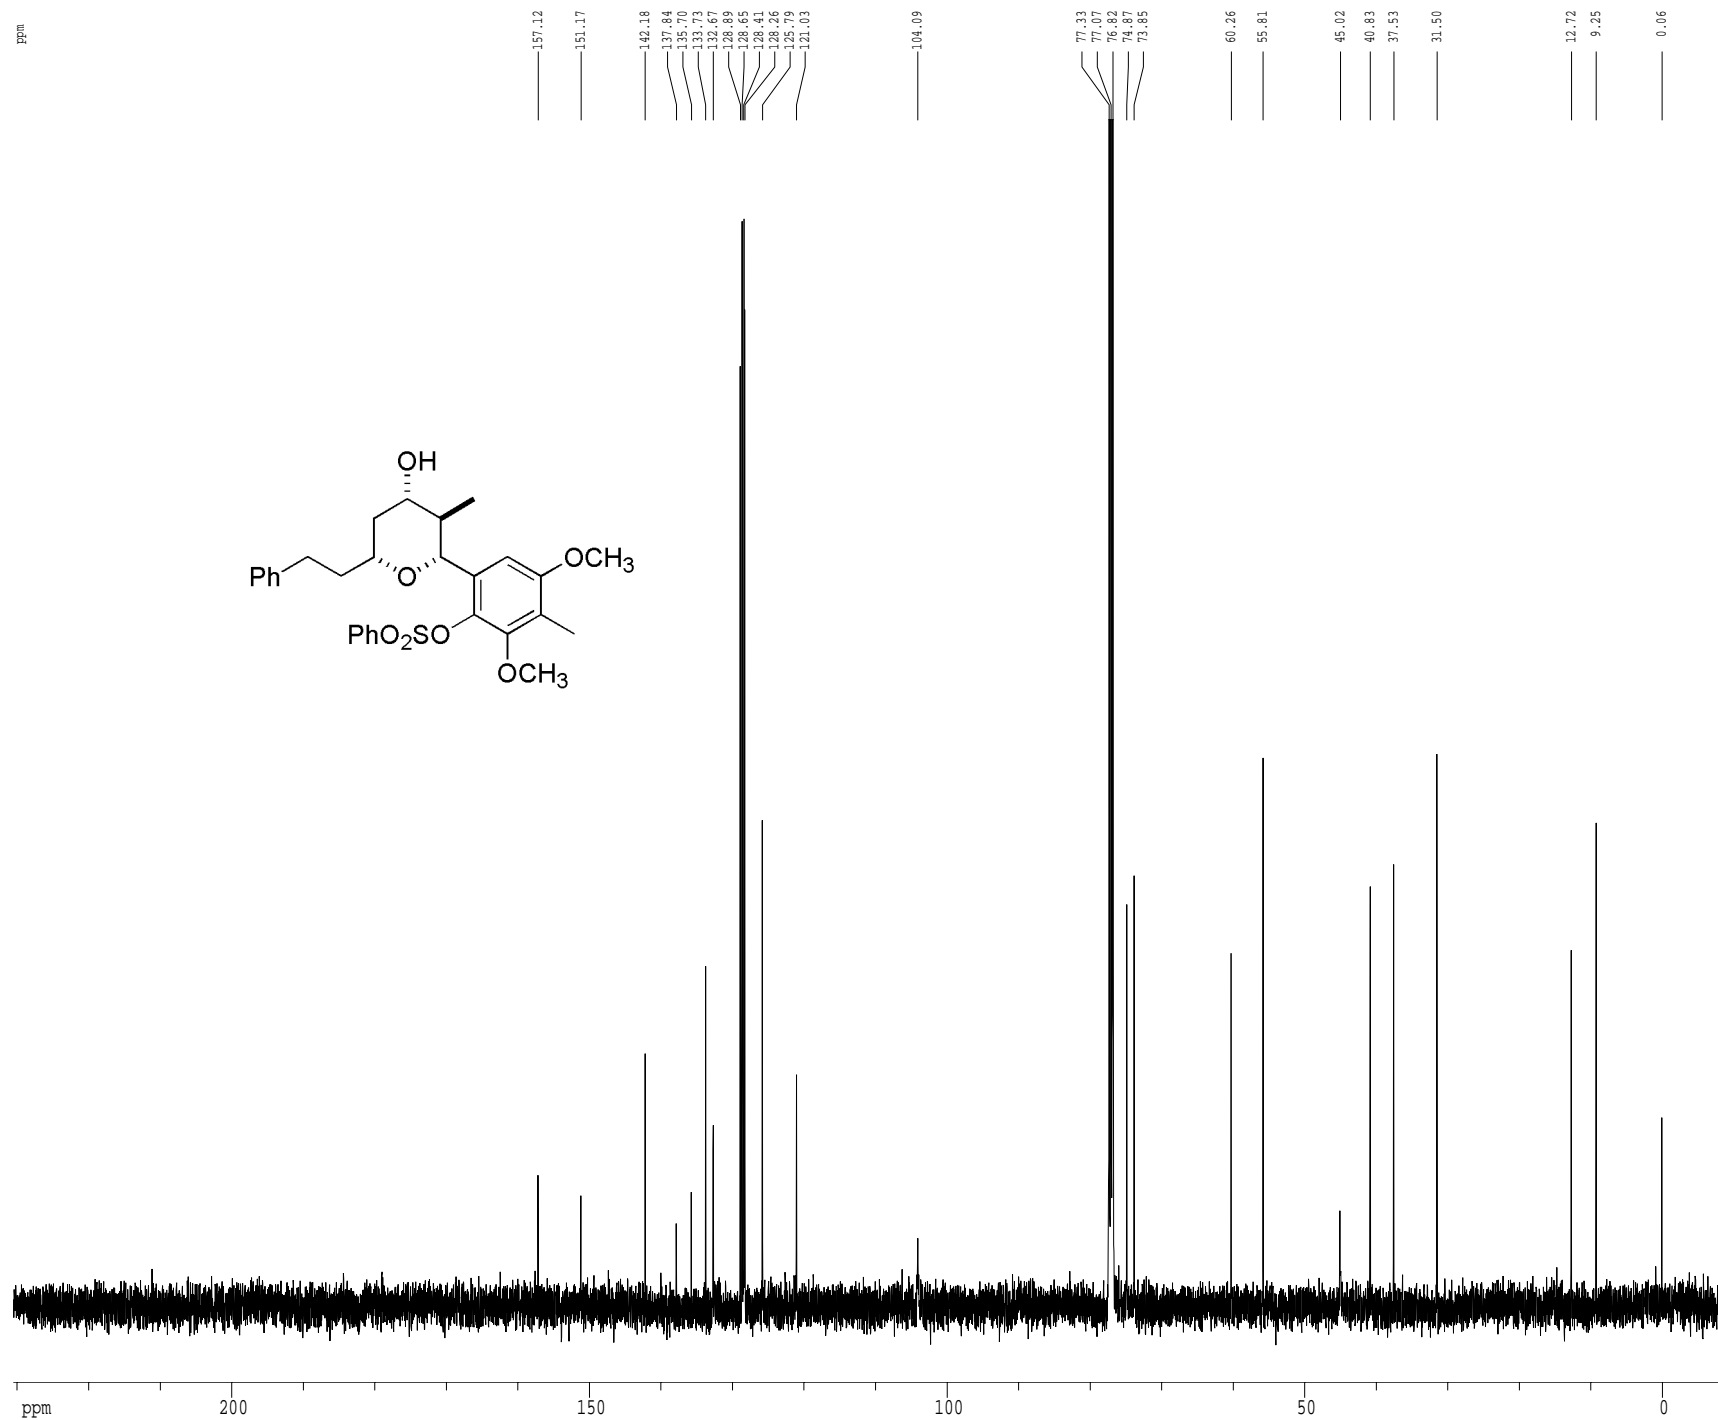

Current Data Parameters  
 USER tadpet  
 NAME KT-2-273  
 EXPNO 2  
 PROCNO 1

F2 - Acquisition Parameters  
 Date\_ 20080518  
 Time 19.37  
 INSTRUM cryo500  
 PROBHD 5 mm CPTCI 1H-  
 PULPROG zgdc30  
 TD 65418  
 SOLVENT CDCl3  
 NS 701  
 DS 4  
 SWH 30303.031 Hz  
 FIDRES 0.463222 Hz  
 AQ 1.0794470 sec  
 RG 13004  
 DW 16.500 usec  
 DE 6.00 usec  
 TE 298.0 K  
 D1 0.25000000 sec  
 d11 0.03000000 sec  
 MCREST 0.00000000 sec  
 MCWREK 0.01500000 sec

===== CHANNEL f1 =====  
 NUC1 13C  
 P1 14.75 usec  
 PL1 -1.00 dB  
 SF01 125.7942548 MHz

===== CHANNEL f2 =====  
 CPDPRG2 waltz16  
 NUC2 1H  
 PCPD2 100.00 usec  
 PL2 1.60 dB  
 PL12 24.80 dB  
 SF02 500.2225011 MHz

F2 - Processing parameters  
 SI 65536  
 SF 125.7804190 MHz  
 WDW EM  
 SSB 0  
 LB 1.00 Hz  
 GB 0  
 PC 2.00

ID NMR plot parameters  
 CX 22.80 cm  
 CY 70.35 cm  
 F1P 230.637 ppm  
 F1 29009.68 Hz  
 F2P -10.287 ppm  
 F2 -1293.96 Hz  
 PPMCM 10.56688 ppm/cm  
 HZCM 1329.10706 Hz/cm

<sup>1</sup>H spectrum

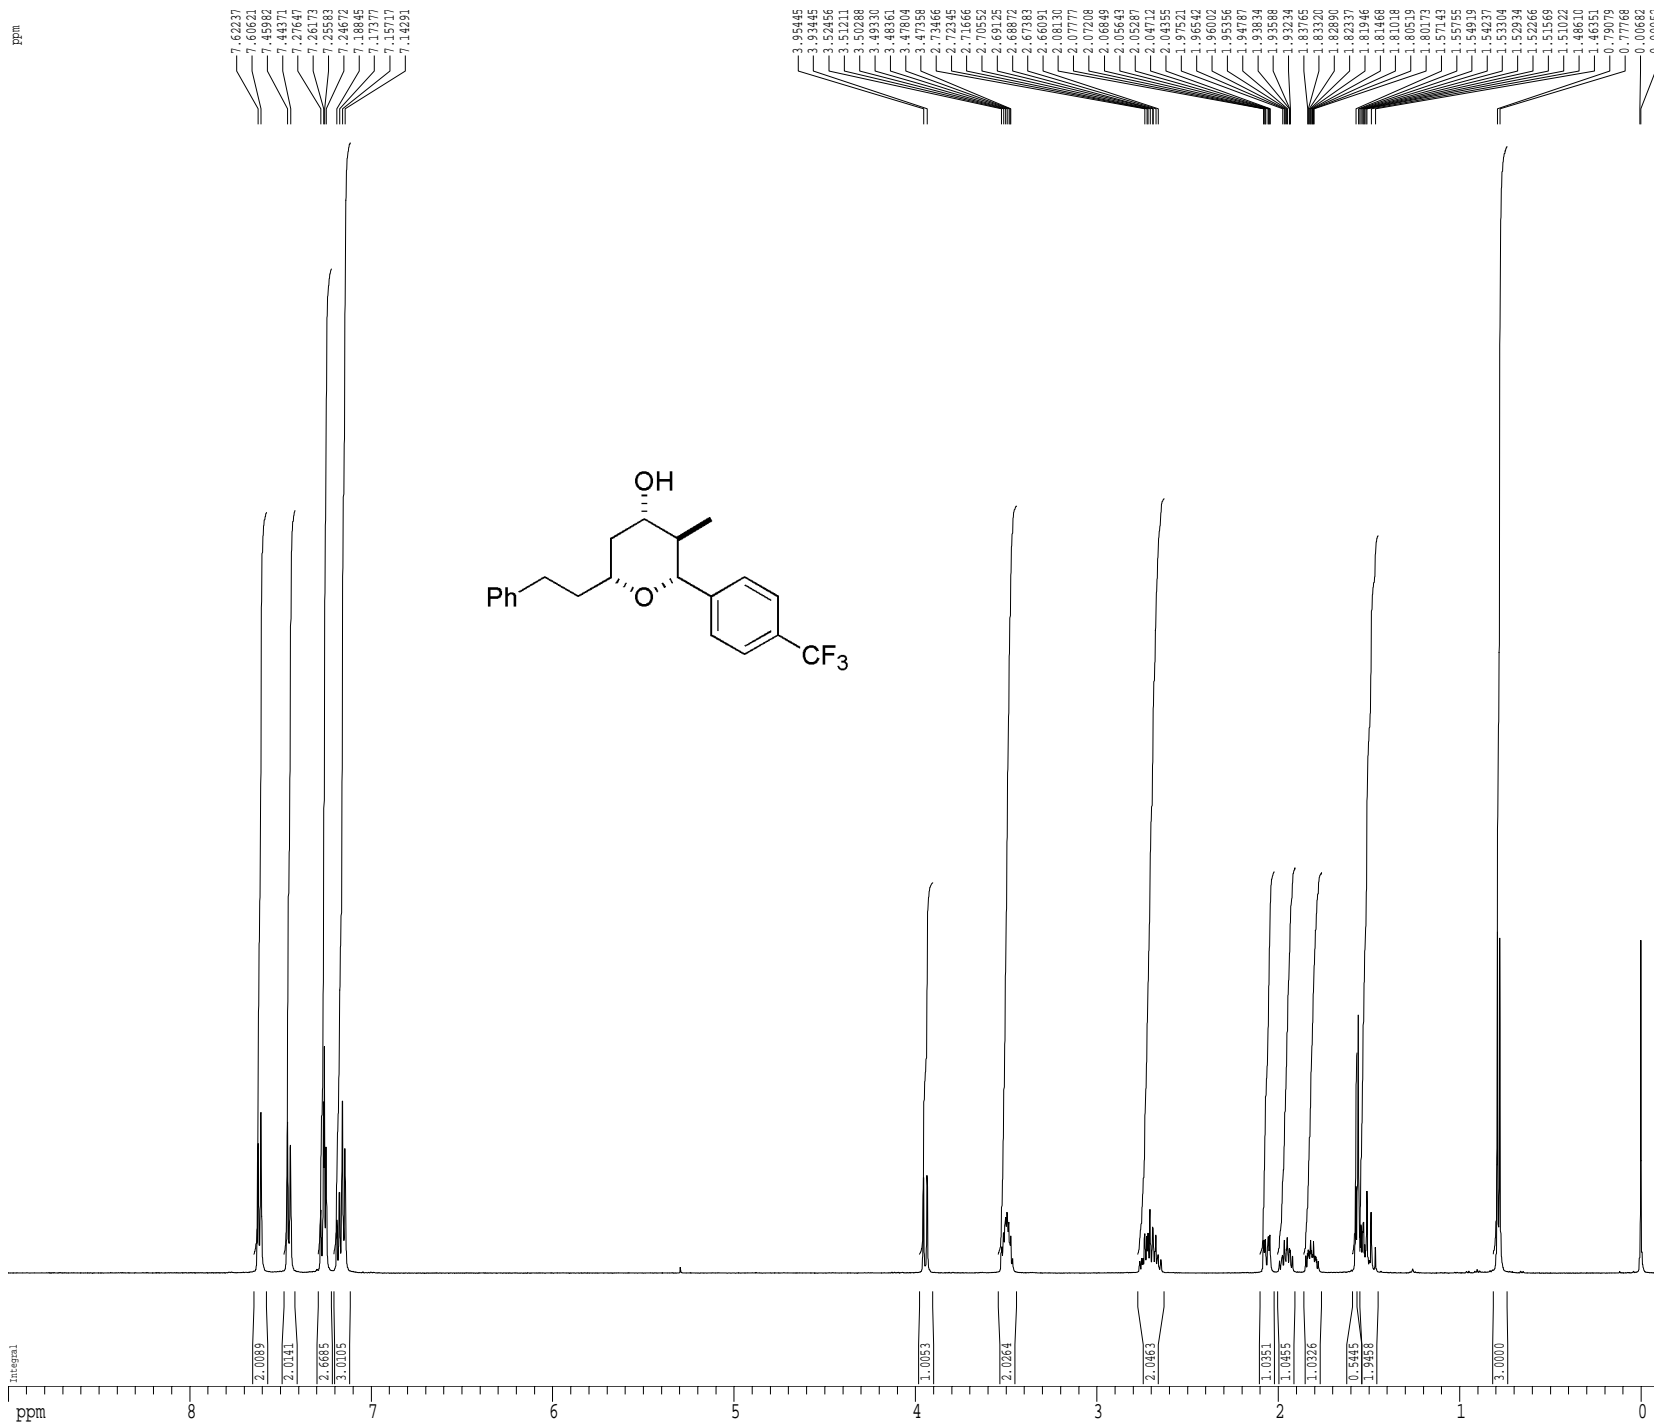

```

Current Data Parameters
USER      tadpet
NAME      KT-3-050A
EXPNO     1
PROCNO    1

F2 - Acquisition Parameters
Date_     20080813
Time      17.41
INSTRUM   gn500
PROBHD    5 mm broadband
PULPROG   zg30
TD         81728
SOLVENT   CDCl3T
NS         8
DS         2
SWH        8012.820 Hz
FIDRES     0.098043 Hz
AQ         5.0998774 sec
RG         812.7
DW         62.400 usec
DE         6.00 usec
TE         298.0 K
DL         0.10000000 sec
MCREST     0.00000000 sec
MCWRX     0.01500000 sec

===== CHANNEL f1 =====
NUC1       1H
P1         12.00 usec
PL1        -3.00 dB
SF01       499.7234980 MHz

F2 - Processing parameters
SI         65536
SF         499.7200336 MHz
WDW        EM
SSB        0
LB         0.30 Hz
GB         0
PC         1.00

1D NMR plot parameters
CX         22.80 cm
CY         4.51 cm
F1P        9.000 ppm
F1         4497.48 Hz
F2P        -0.500 ppm
F2         -249.86 Hz
PPMCM      0.41667 ppm/cm
HZCM       208.21669 Hz/cm
    
```

13C spectrum with 1H decoupling

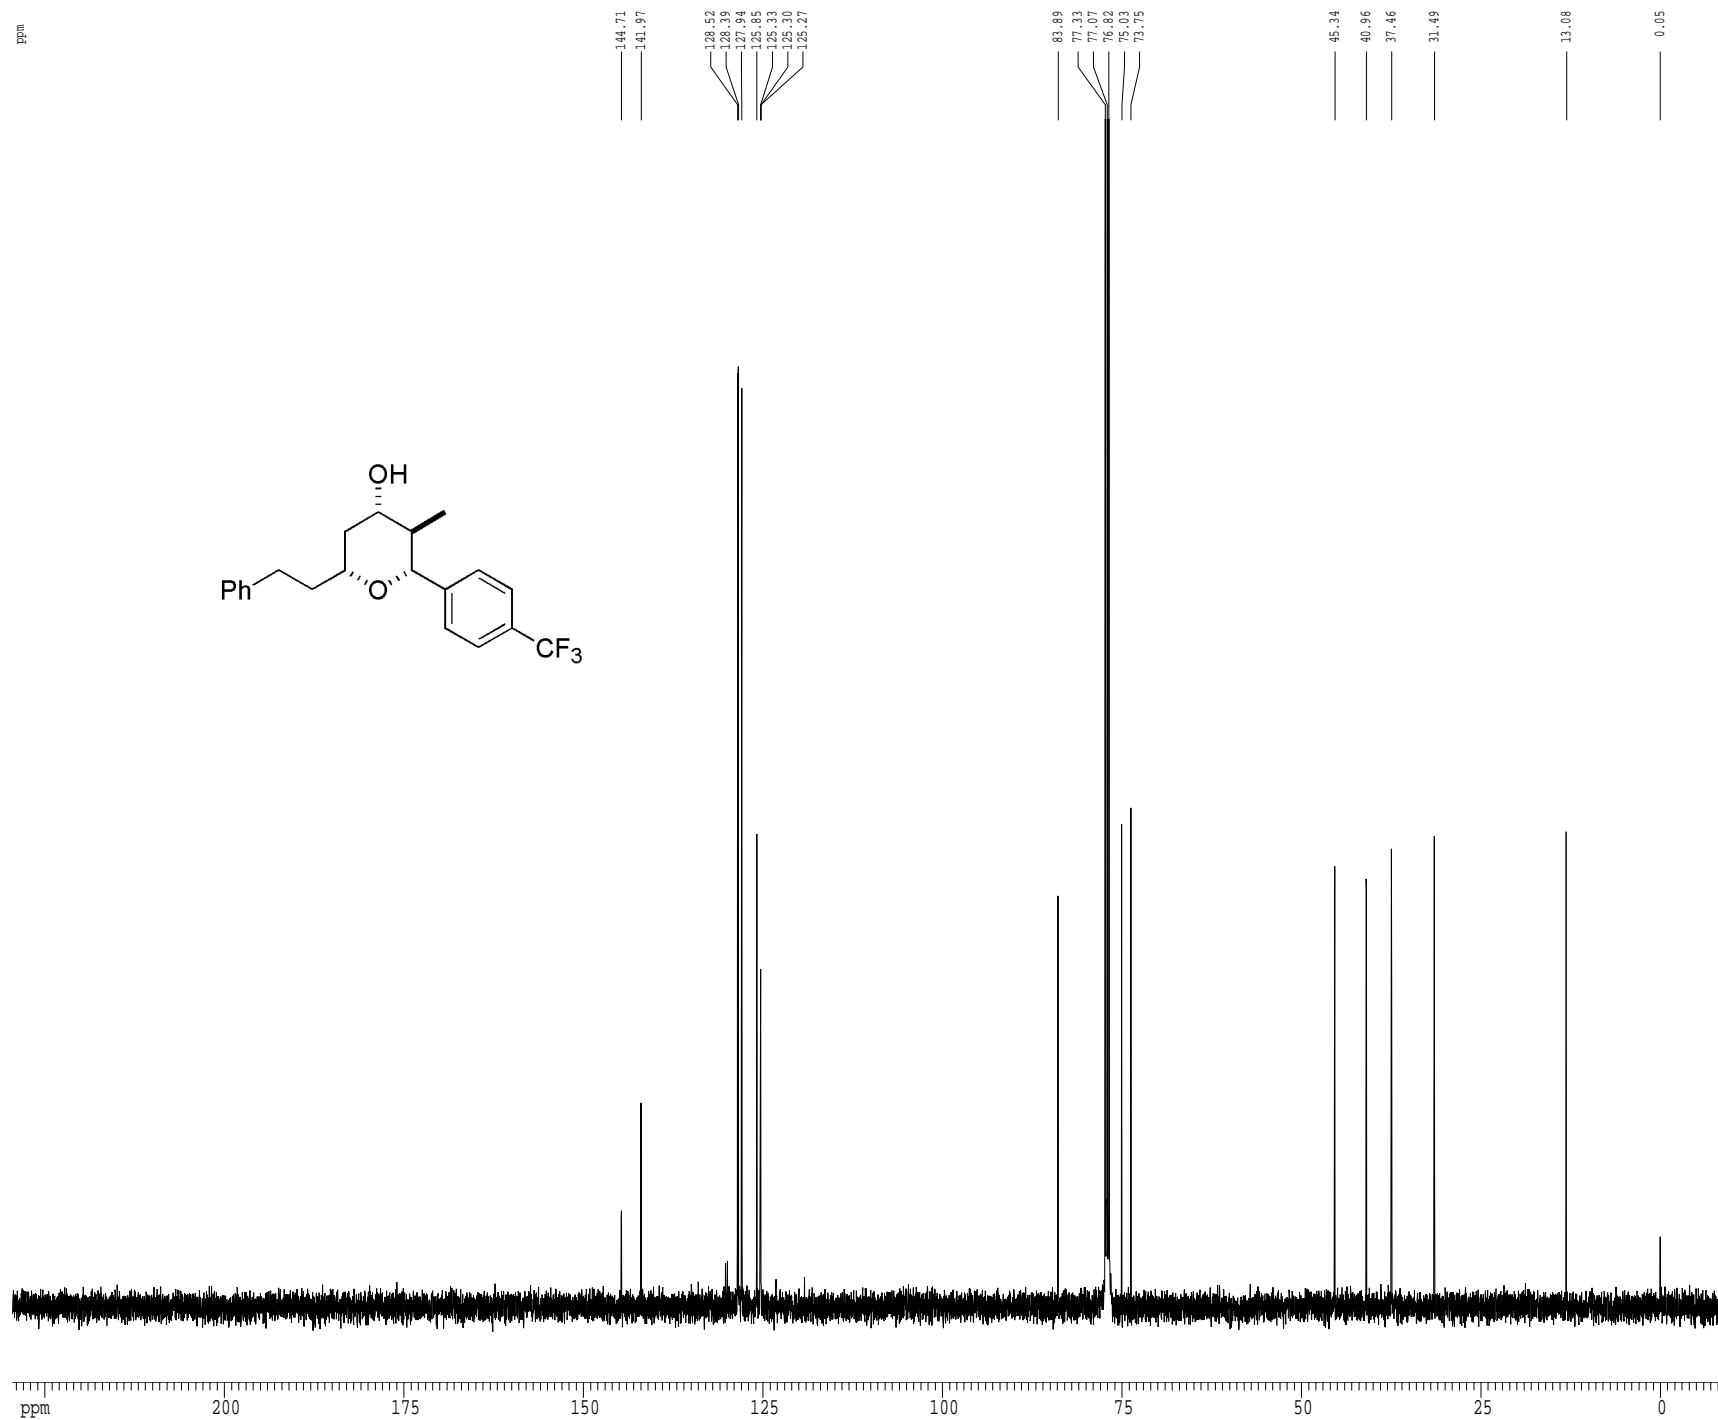

Current Data Parameters  
 USER tadpet  
 NAME KT-3-050A  
 EXPNO 2  
 PROCNO 1

F2 - Acquisition Parameters  
 Date\_ 20080813  
 Time 17.45  
 INSTRUM gm500  
 PROBHD 5 mm broadband  
 PULPROG zgdc30  
 TD 65536  
 SOLVENT CDCl3  
 NS 1024  
 DS 4  
 SWH 30303.031 Hz  
 FIDRES 0.462388 Hz  
 AQ 1.0813940 sec  
 RG 5792.6  
 DN 16.500 usec  
 DE 4.50 usec  
 TE 298.0 K  
 D1 0.25000000 sec  
 d11 0.03000000 sec  
 MCREST 0.00000000 sec  
 MCWRK 0.01500000 sec

===== CHANNEL f1 =====  
 NUC1 13C  
 P1 7.08 usec  
 PL1 0.00 dB  
 SF01 125.6685160 MHz

===== CHANNEL f2 =====  
 CPDPRG2 waltz16  
 NUC2 1H  
 PCPD2 80.00 usec  
 PL2 -3.00 dB  
 PL12 14.70 dB  
 SF02 499.7224986 MHz

F2 - Processing parameters  
 SI 65536  
 SF 125.6546925 MHz  
 WDW EM  
 SSB 0  
 LB 1.00 Hz  
 GB 0  
 PC 2.00

ID NMR plot parameters  
 CX 22.80 cm  
 CY 23.51 cm  
 F1P 225.520 ppm  
 F1 28840.22 Hz  
 F2P -10.507 ppm  
 F2 -1320.20 Hz  
 PPMCM 10.52747 ppm/cm  
 HZCM 1322.82581 Hz/cm

<sup>1</sup>H spectrum

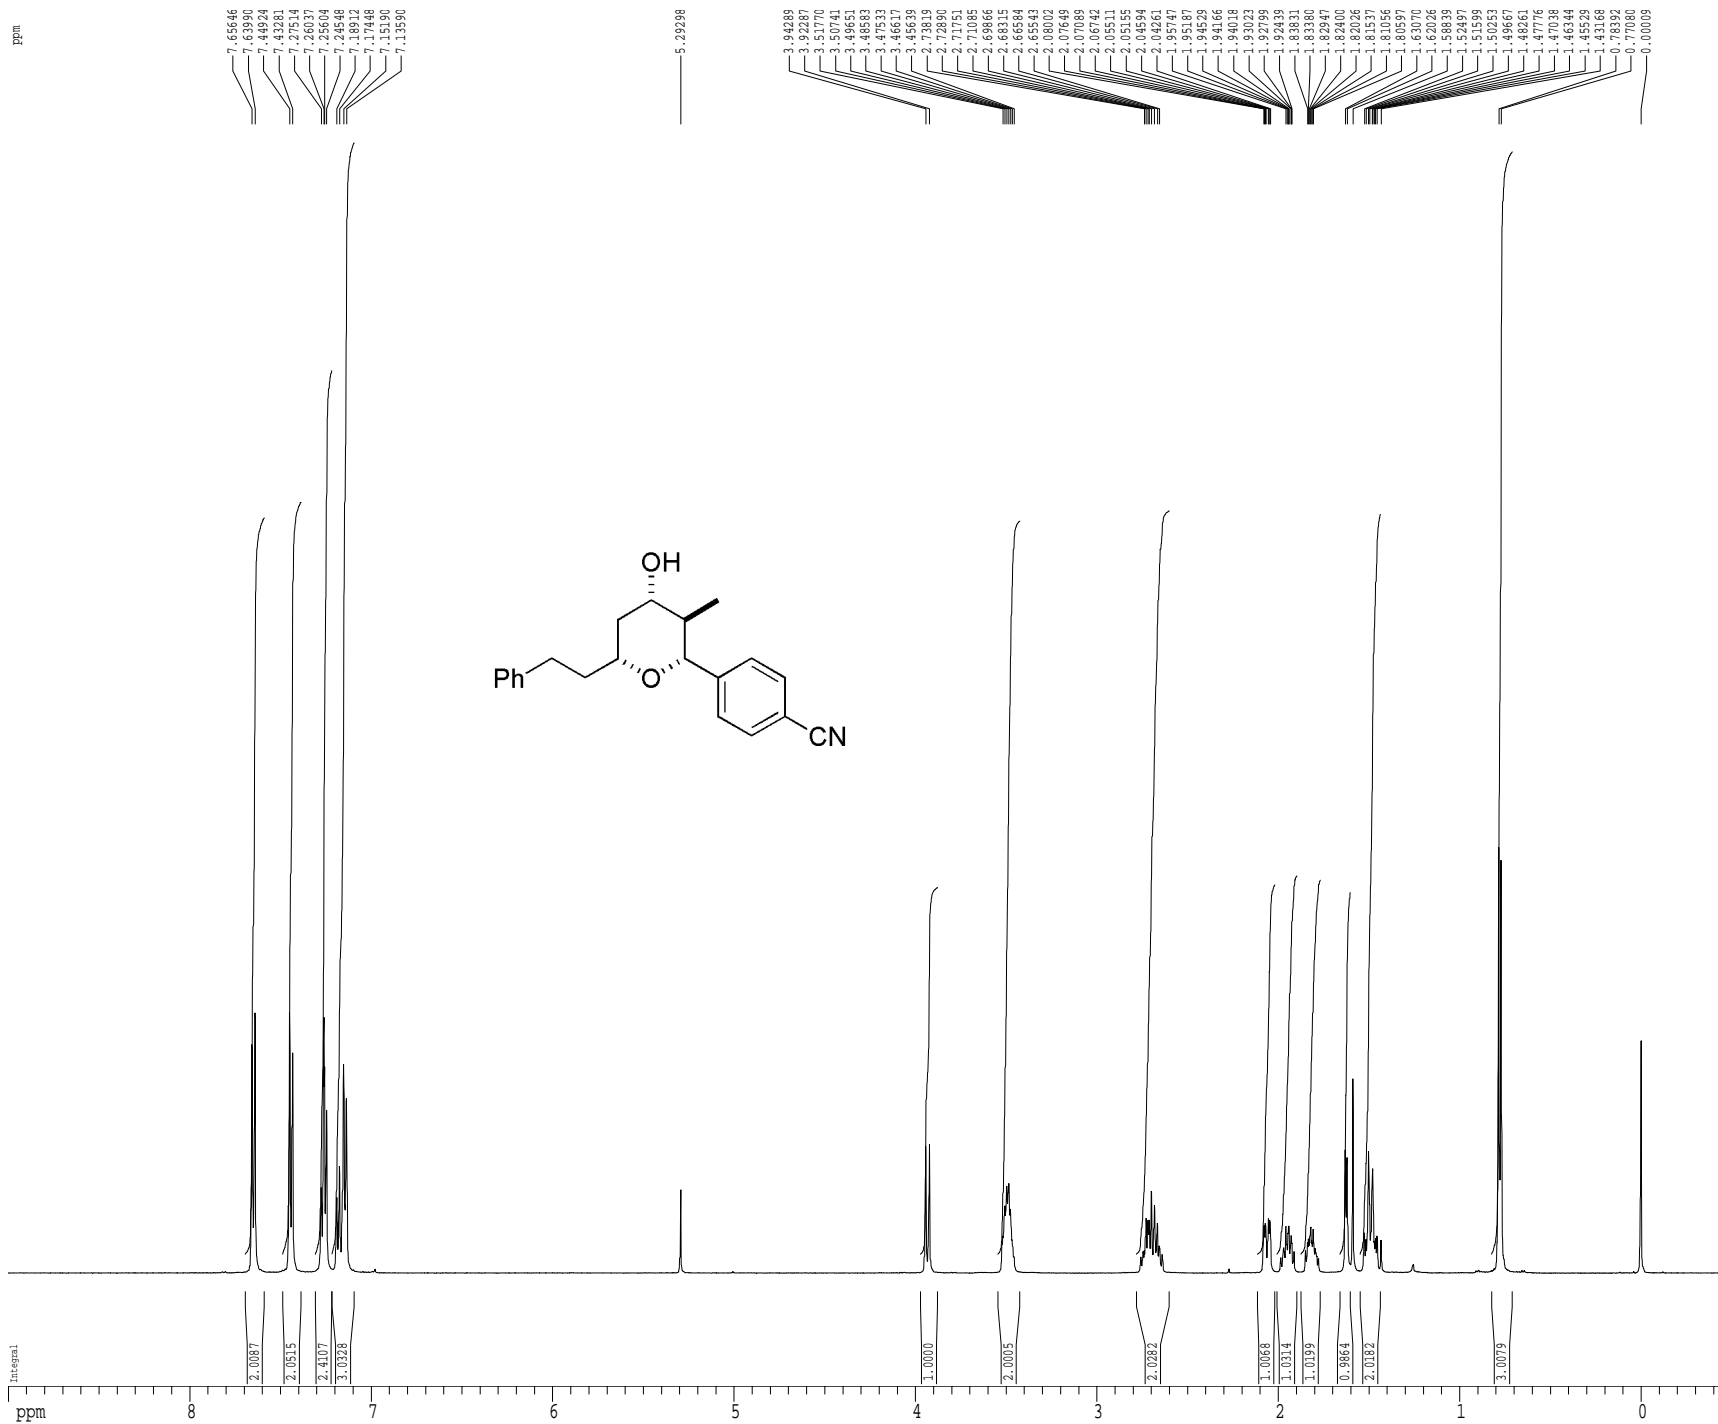

```

Current Data Parameters
USER          tadpet
NAME          KT-3-049A
EXPNO        1
PROCNO       1

F2 - Acquisition Parameters
Date_        20080813
Time         17.31
INSTRUM      gn500
PROBHD       5 mm broadband
PULPROG      zg30
TD           81728
SOLVENT      CDCl3T
NS           8
DS           2
SWH          8012.820 Hz
FIDRES       0.098043 Hz
AQ           5.0998774 sec
RG           143.7
DW           62.400 usec
DE           6.00 usec
TE           298.0 K
DL           0.10000000 sec
MCREST       0.00000000 sec
MCWRX        0.01500000 sec

===== CHANNEL f1 =====
NUC1         1H
P1           12.00 usec
PL1          -3.00 dB
SF01         499.7234980 MHz

F2 - Processing parameters
SI           65536
SF           499.7200331 MHz
WDW          EM
SSB          0
LB           0.30 Hz
GB           0
PC           1.00

1D NMR plot parameters
CX           22.80 cm
CY           5.63 cm
F1P          9.000 ppm
F1           4497.48 Hz
F2P          -0.500 ppm
F2           -249.86 Hz
PPMCM        0.41667 ppm/cm
HZCM         208.21669 Hz/cm
    
```

<sup>13</sup>C spectrum with <sup>1</sup>H decoupling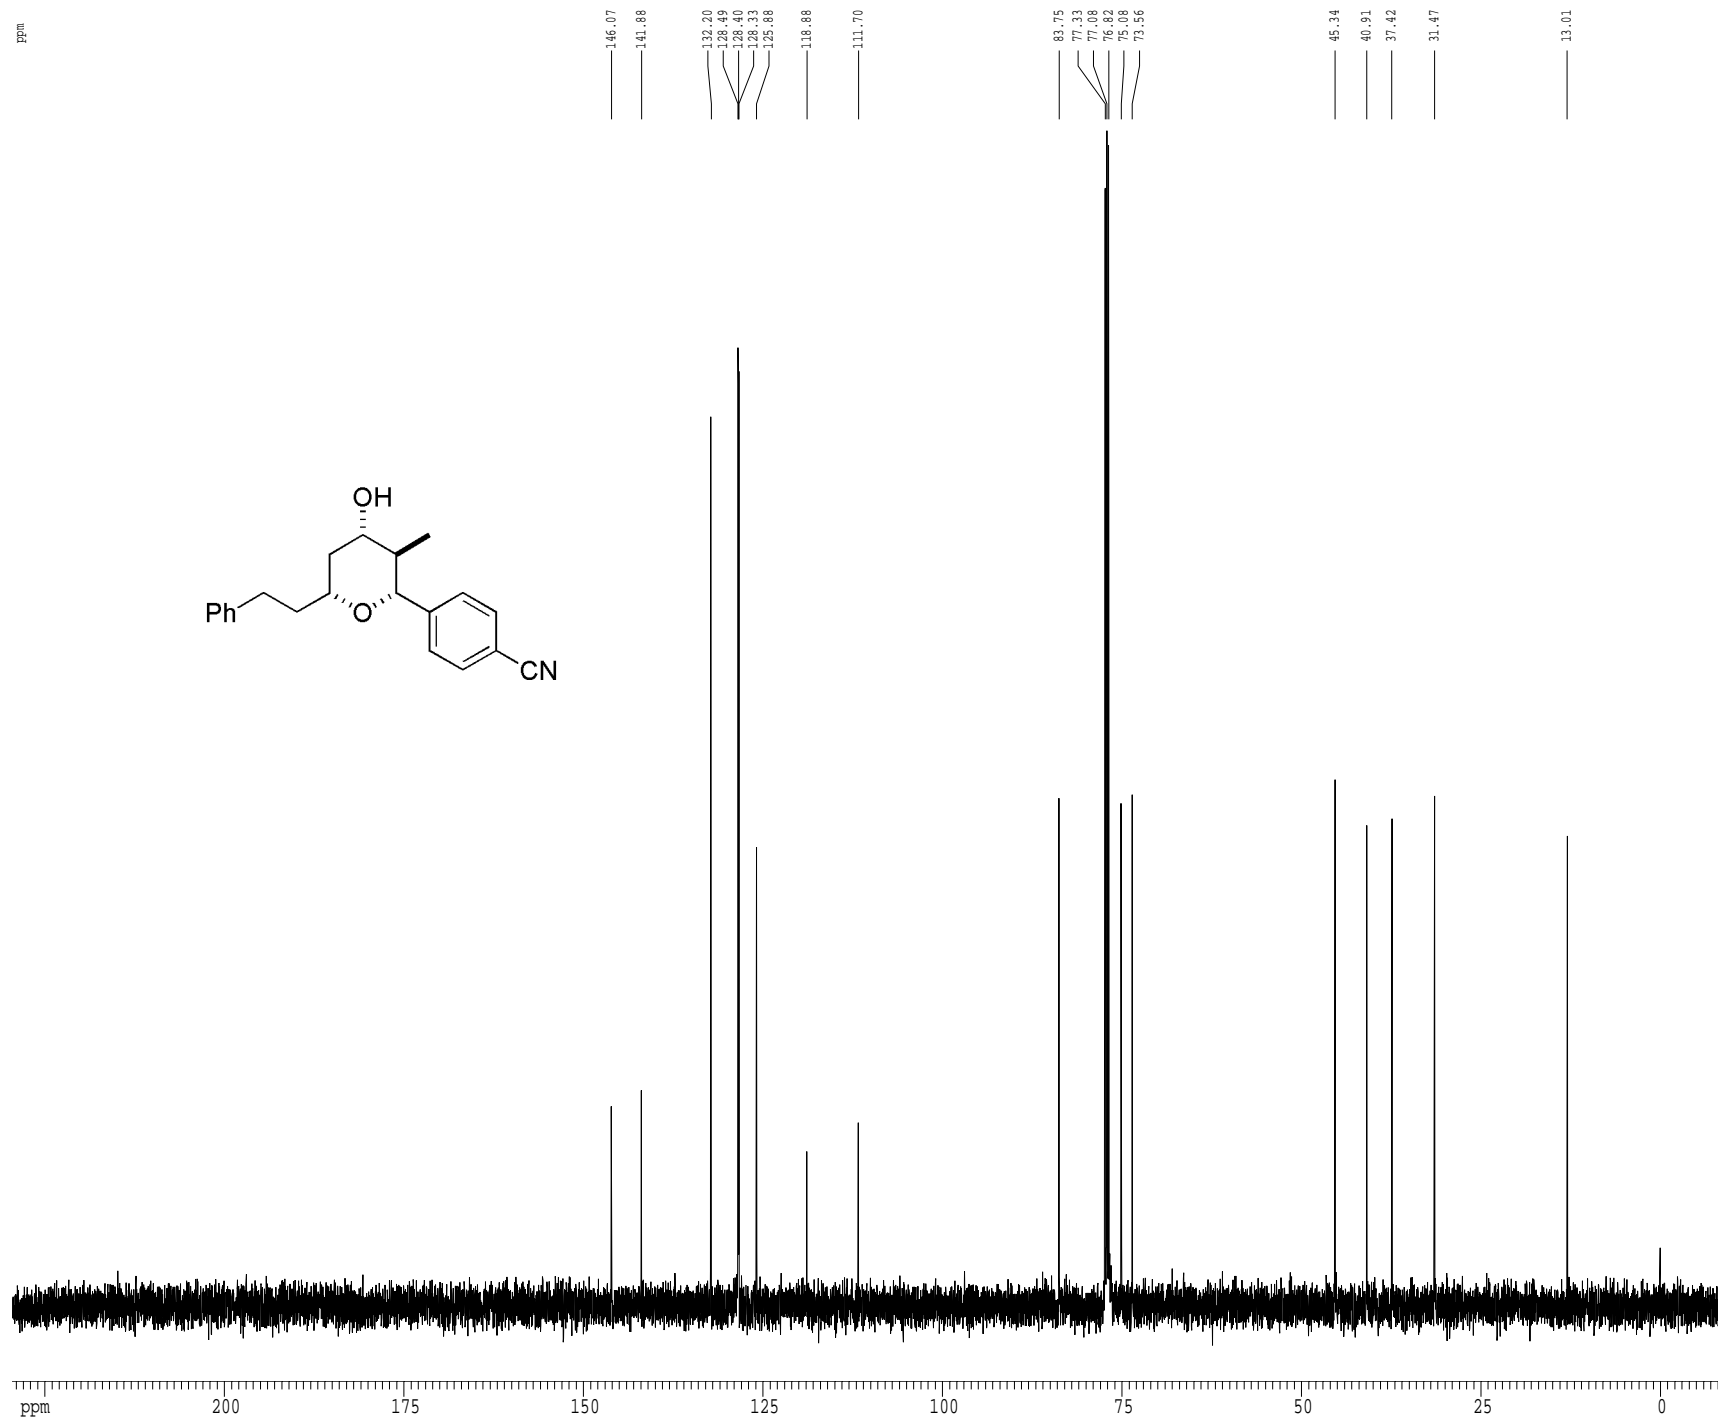

Current Data Parameters  
 USER tadpet  
 NAME KT-3-049A  
 EXPNO 2  
 PROCNO 1

F2 - Acquisition Parameters  
 Date\_ 20080813  
 Time 17.34  
 INSTRUM gm500  
 PROBHD 5 mm broadband  
 PULPROG zgdc30  
 TD 65536  
 SOLVENT CDC13  
 NS 201  
 DS 4  
 SWH 30303.031 Hz  
 FIDRES 0.462388 Hz  
 AQ 1.0813940 sec  
 RG 4597.6  
 DN 16.500 usec  
 DE 4.50 usec  
 TE 298.0 K  
 D1 0.25000000 sec  
 d11 0.03000000 sec  
 MCREST 0.00000000 sec  
 MCWREK 0.01500000 sec

===== CHANNEL f1 =====  
 NUC1 13C  
 P1 7.08 usec  
 PL1 0.00 dB  
 SF01 125.6685160 MHz

===== CHANNEL f2 =====  
 CPDPRG2 waltz16  
 NUC2 1H  
 PCPD2 80.00 usec  
 PL2 -3.00 dB  
 PL12 14.70 dB  
 SF02 499.7224986 MHz

F2 - Processing parameters  
 SI 65536  
 SF 125.6546939 MHz  
 WDW EM  
 SSB 0  
 LB 1.00 Hz  
 GB 0  
 PC 2.00

ID NMR plot parameters  
 CX 22.80 cm  
 CY 15.65 cm  
 F1P 229.520 ppm  
 F1 28840.22 Hz  
 F2P -10.507 ppm  
 F2 -1320.20 Hz  
 PPMCM 10.52747 ppm/cm  
 HZCM 1322.82581 Hz/cm

<sup>1</sup>H spectrum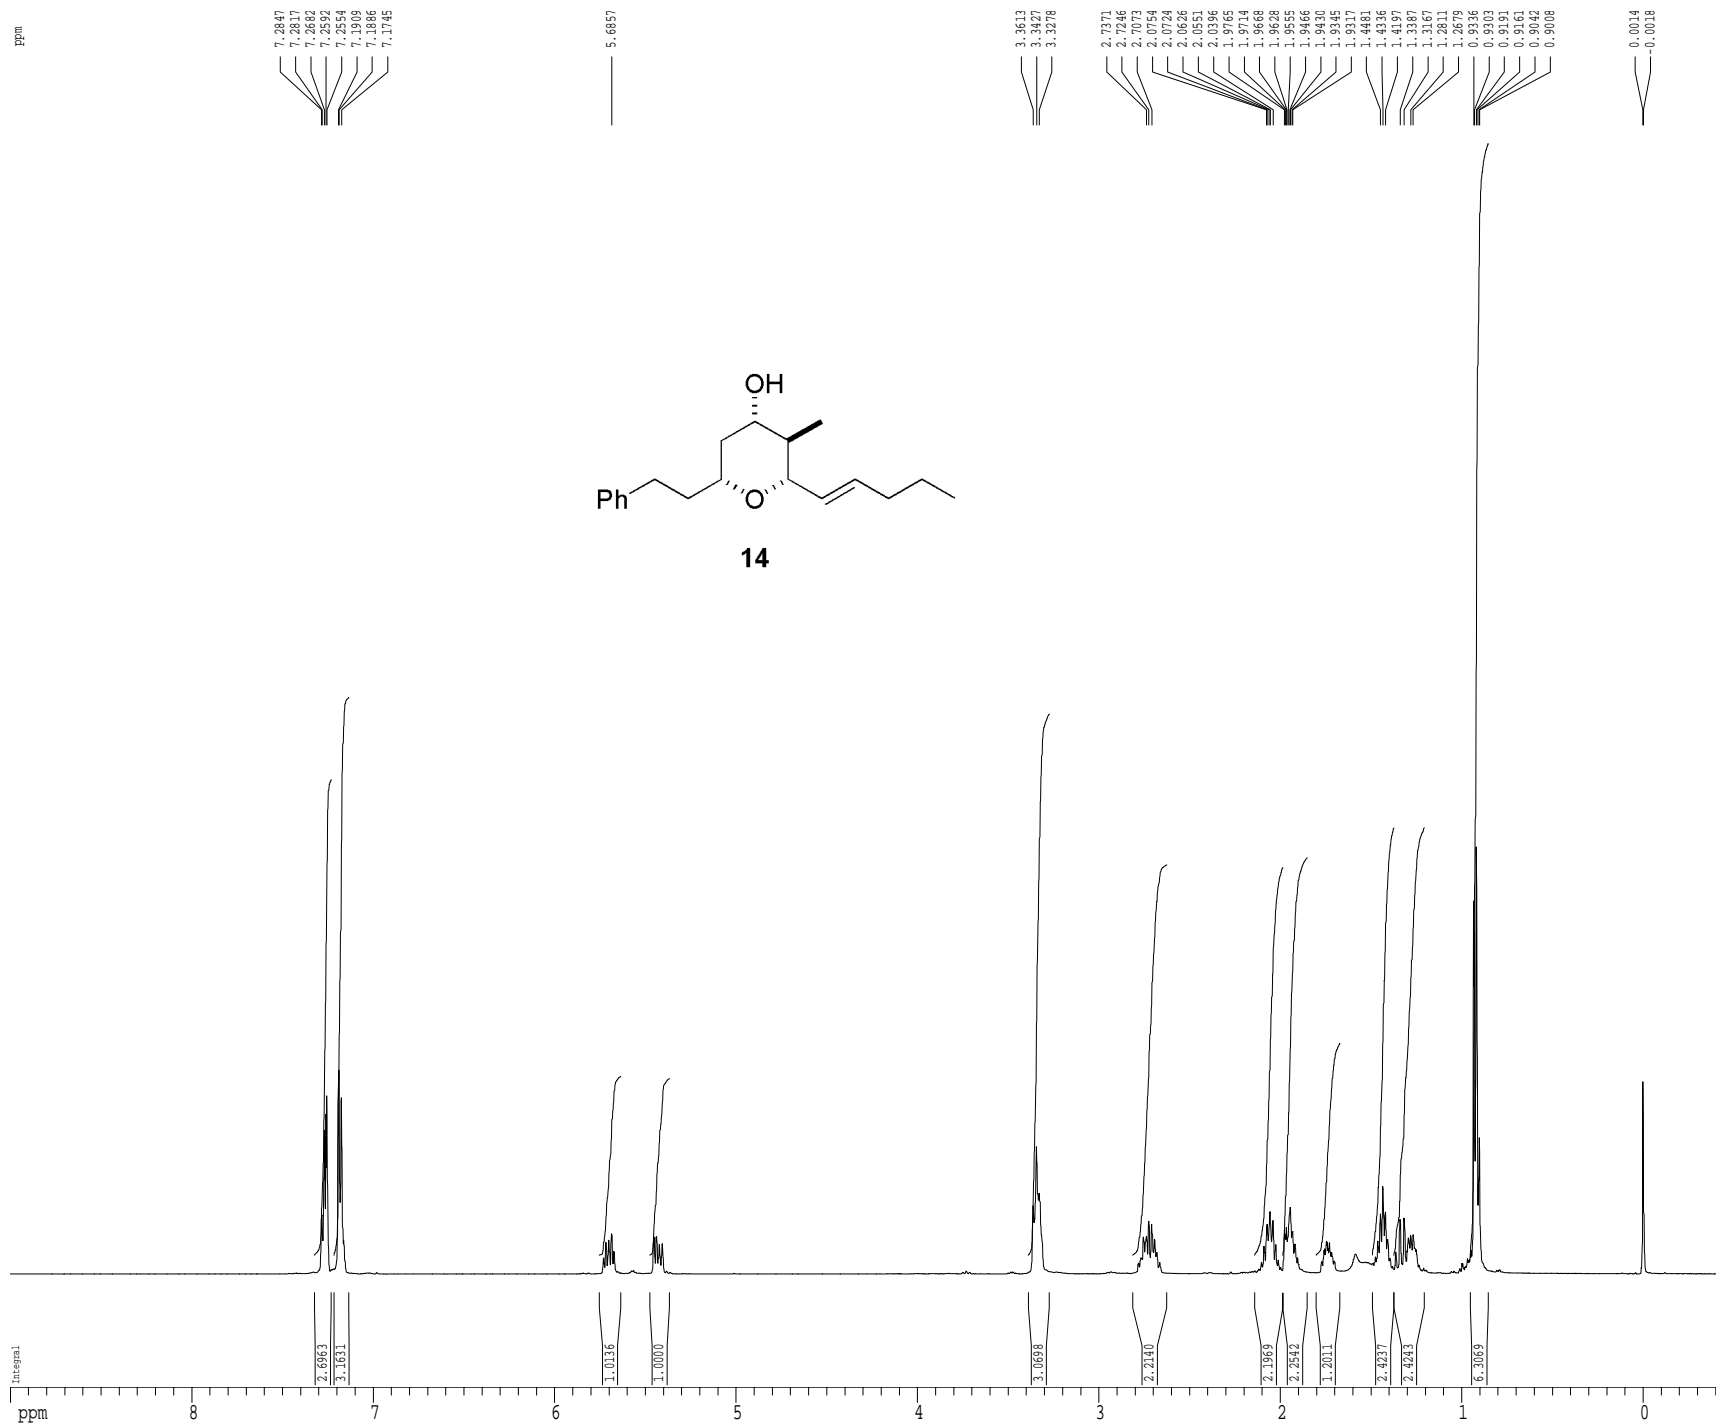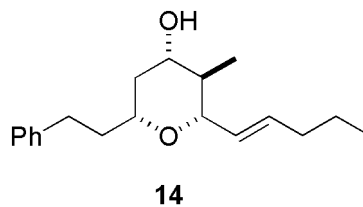

Current Data Parameters  
 USER tadpet  
 NAME KT-2-278  
 EXPNO 1  
 PROCNO 1

F2 - Acquisition Parameters  
 Date\_ 20080523  
 Time 13.24  
 INSTRUM cryo500  
 PROBHD 5 mm CPTCI 1H-  
 PULPROG zg30  
 TD 81728  
 SOLVENT CDCl3T  
 NS 8  
 DS 2  
 SWH 8012.820 Hz  
 FIDRES 0.098043 Hz  
 AQ 5.0998774 sec  
 RG 4  
 DW 62.400 usec  
 DE 6.00 usec  
 TE 298.0 K  
 DL 0.10000000 sec  
 MCREST 0.00000000 sec  
 MCWEX 0.01500000 sec

===== CHANNEL f1 =====  
 NUC1 1H  
 P1 7.38 usec  
 PL1 1.60 dB  
 SF01 500.2235015 MHz

F2 - Processing parameters  
 SI 65536  
 SF 500.2200320 MHz  
 WDW EM  
 SSB 0  
 LB 0.30 Hz  
 GB 0  
 PC 4.00

1D NMR plot parameters  
 CX 22.80 cm  
 CY 5.66 cm  
 F1P 9.000 ppm  
 F1 4501.98 Hz  
 F2P -0.500 ppm  
 F2 -250.11 Hz  
 PPMCM 0.41667 ppm/cm  
 HZCM 208.42502 Hz/cm



13C spectrum with 1H decoupling

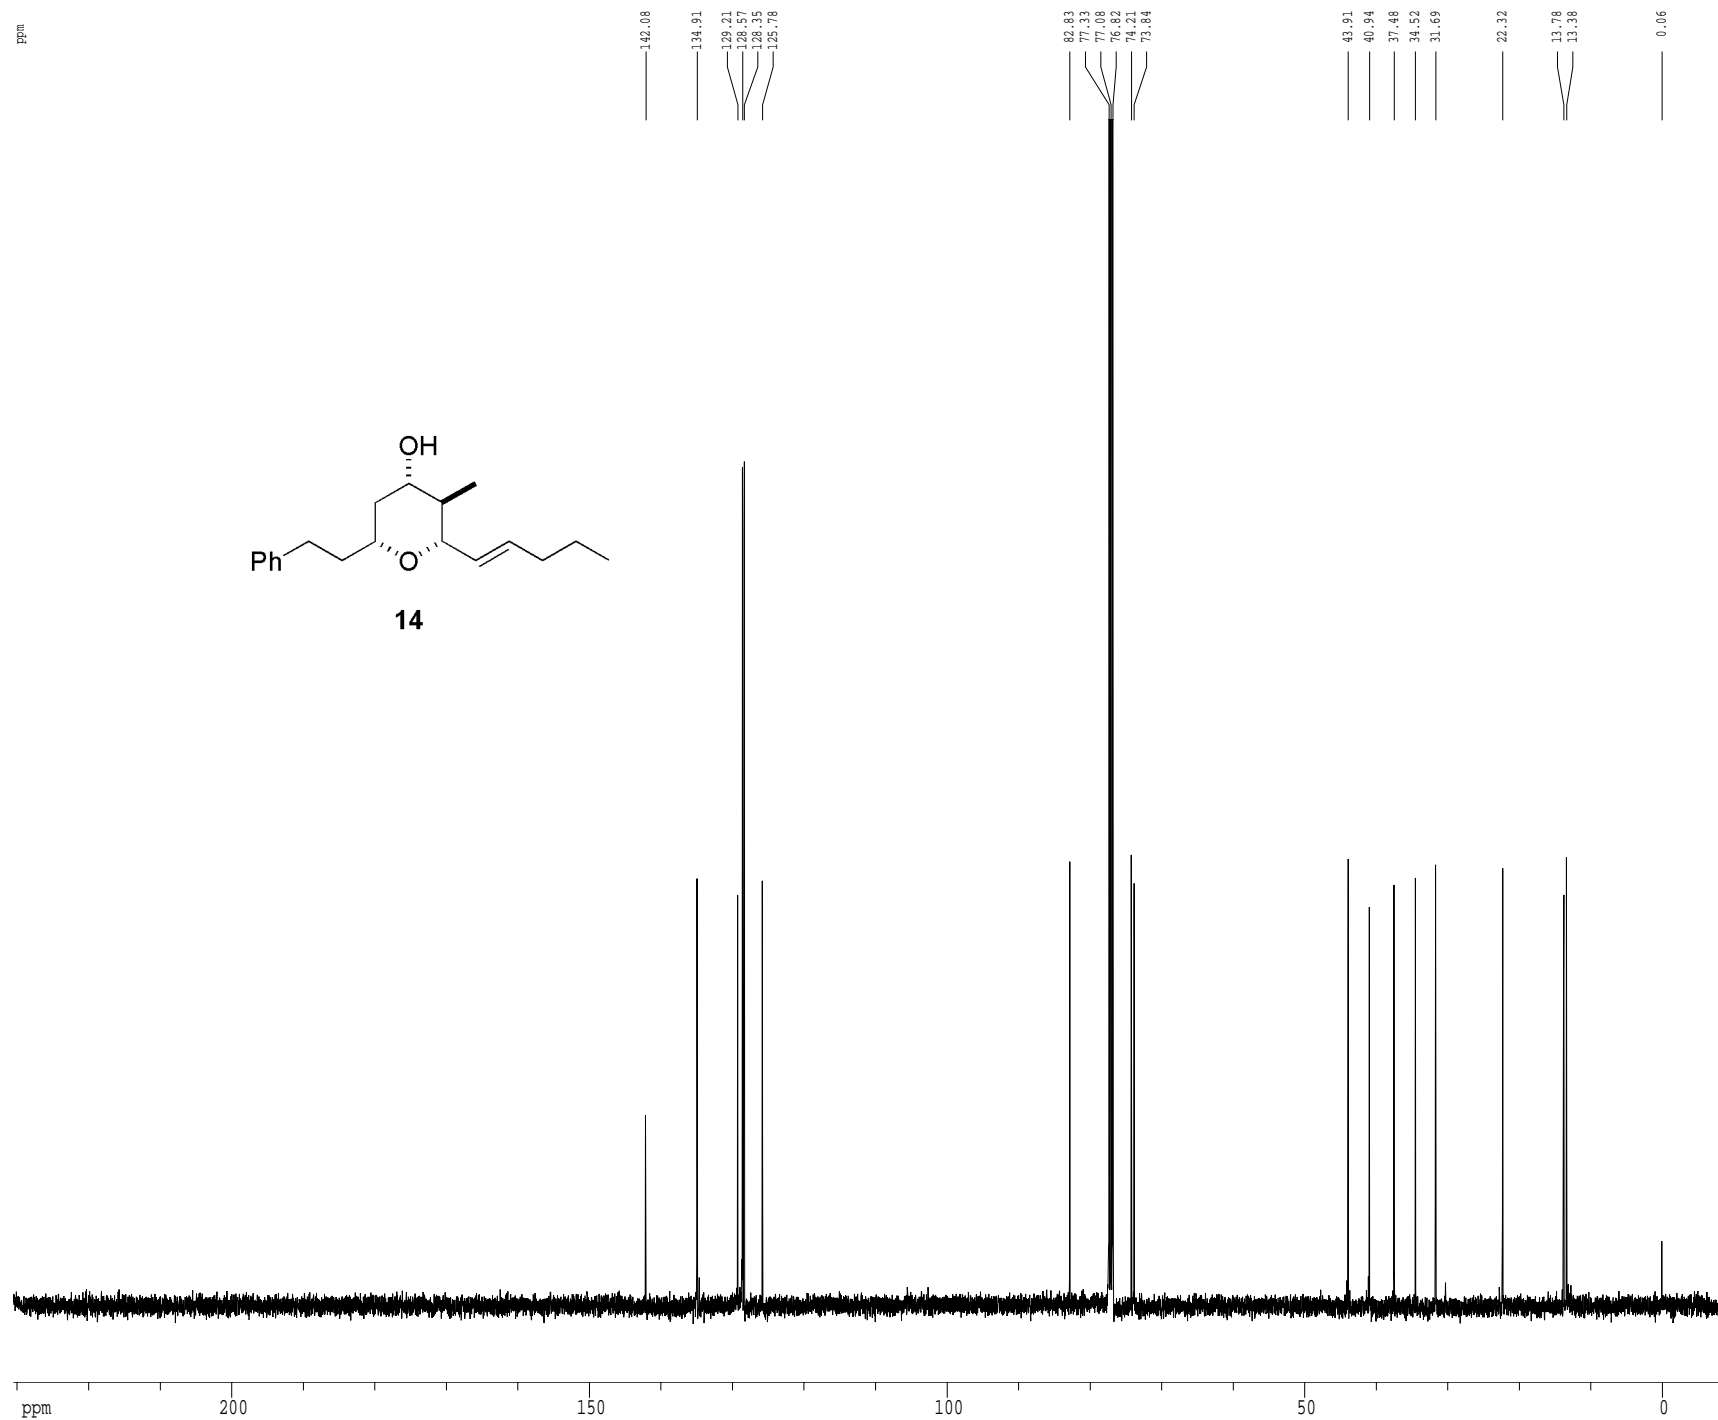

Current Data Parameters  
 USER tadpet  
 NAME KT-2-278  
 EXPNO 2  
 PROCNO 1

F2 - Acquisition Parameters  
 Date\_ 20080523  
 Time 13.30  
 INSTRUM cryo500  
 PROBHD 5 mm CPTCI 1H-  
 PULPROG zgdc30  
 TD 65418  
 SOLVENT CDC13  
 NS 196  
 DS 4  
 SWH 30303.031 Hz  
 FIDRES 0.463222 Hz  
 AQ 1.0794470 sec  
 RG 8192  
 DN 16.500 usec  
 DE 6.00 usec  
 TE 298.0 K  
 D1 0.25000000 sec  
 d11 0.03000000 sec  
 MCREST 0.00000000 sec  
 MCWREK 0.01500000 sec

===== CHANNEL f1 =====  
 NUC1 13C  
 P1 14.75 usec  
 PL1 -1.00 dB  
 SF01 125.7942548 MHz

===== CHANNEL f2 =====  
 CPDPRG2 waltz16  
 NUC2 1H  
 PCPD2 100.00 usec  
 PL2 1.60 dB  
 PL12 24.80 dB  
 SF02 500.2225011 MHz

F2 - Processing parameters  
 SI 65536  
 SF 125.7804190 MHz  
 WDW EM  
 SSB 0  
 LB 1.00 Hz  
 GB 0  
 PC 2.00

1D NMR plot parameters  
 CX 22.80 cm  
 CY 23.33 cm  
 F1P 230.637 ppm  
 F1 29009.68 Hz  
 F2P -10.287 ppm  
 F2 -1293.96 Hz  
 PPMCM 10.56688 ppm/cm  
 HZCM 1329.10706 Hz/cm

<sup>1</sup>H spectrum

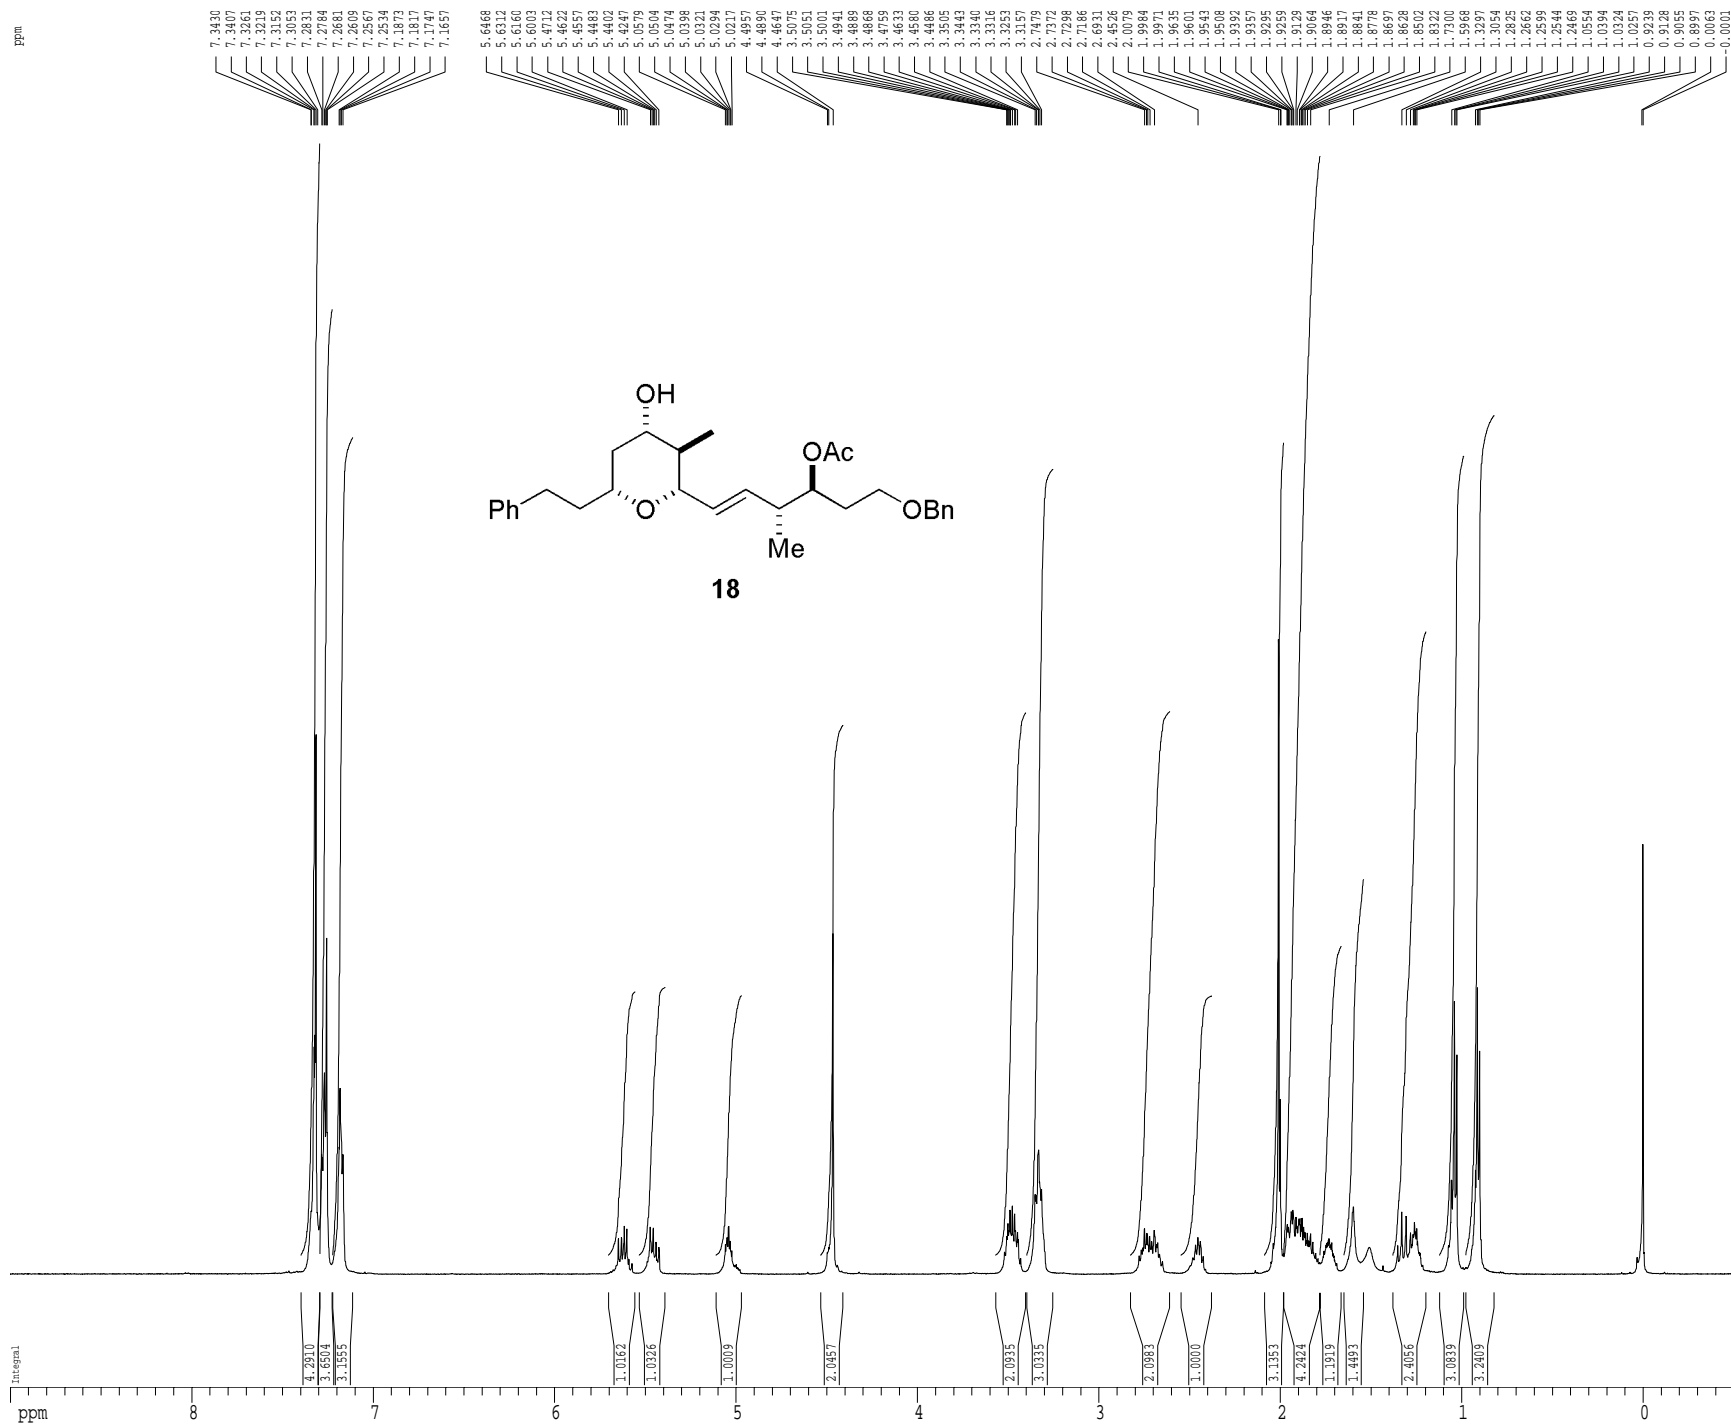

Current Data Parameters  
 USER tadpet  
 NAME KT-2-30082  
 EXPNO 1  
 PROCNO 1

F2 - Acquisition Parameters  
 Date\_ 20080805  
 Time 17.27  
 INSTRUM gn500  
 PROBHD 5 mm broadband  
 PULPROG zg30  
 TD 81728  
 SOLVENT CDCl3T  
 NS 8  
 DS 2  
 SWH 8012.820 Hz  
 FIDRES 0.098043 Hz  
 AQ 5.0998774 sec  
 RG 128  
 DW 62.400 usec  
 DE 6.00 usec  
 TE 298.0 K  
 DL 0.10000000 sec  
 MCREST 0.00000000 sec  
 MCWEX 0.01500000 sec

===== CHANNEL f1 =====  
 NUC1 1H  
 P1 12.00 usec  
 PL1 -3.00 dB  
 SF01 499.7234980 MHz

F2 - Processing parameters  
 SI 65536  
 SF 499.7200325 MHz  
 WDW EM  
 SSB 0  
 LB 0.30 Hz  
 GB 0  
 PC 1.00

1D NMR plot parameters  
 CX 22.80 cm  
 CY 8.42 cm  
 F1P 9.000 ppm  
 F1 4497.48 Hz  
 F2P -0.500 ppm  
 F2 -249.86 Hz  
 PPMCM 0.41667 ppm/cm  
 HZCM 208.21669 Hz/cm

<sup>13</sup>C spectrum with <sup>1</sup>H decoupling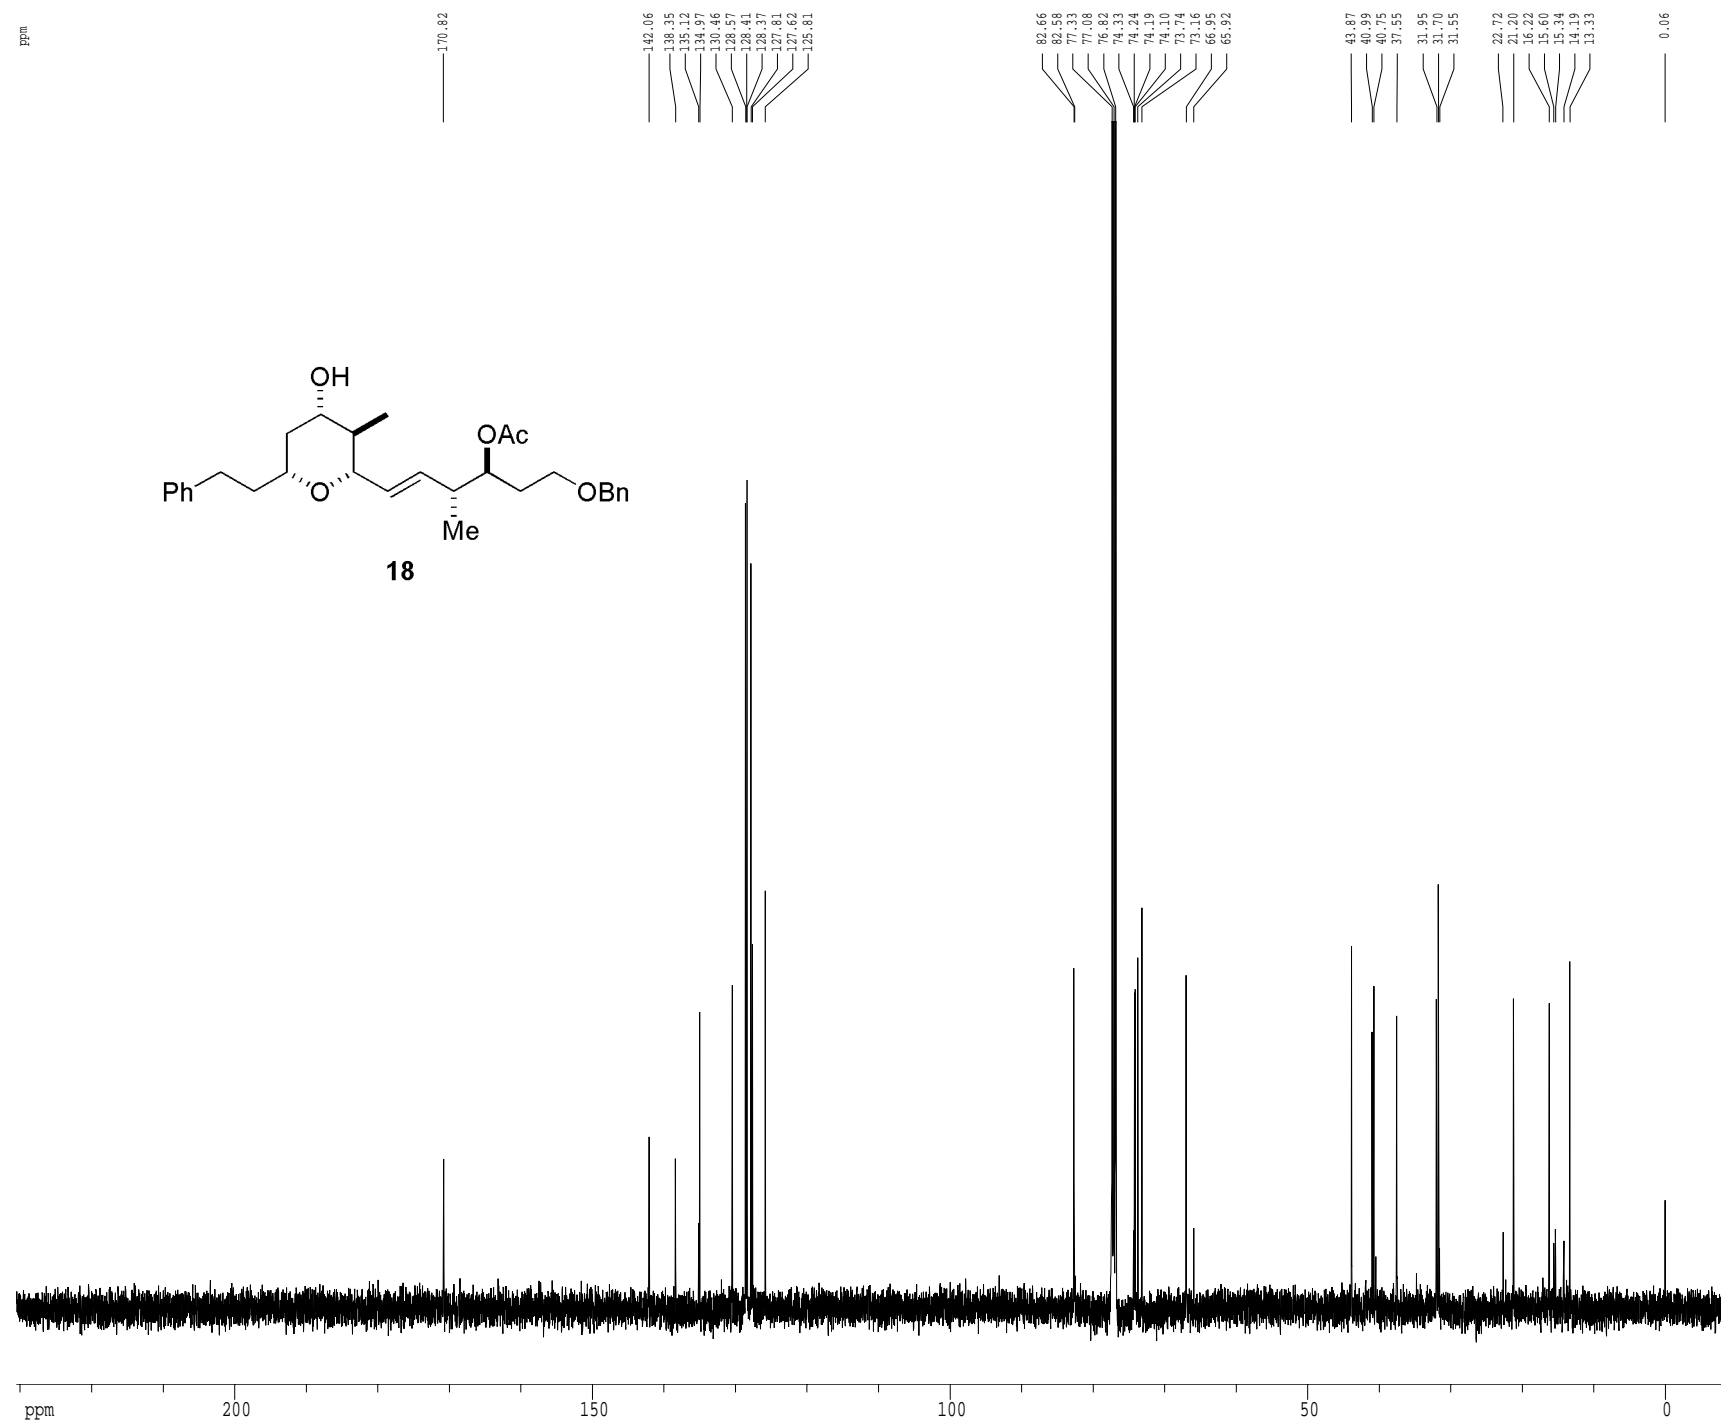

Current Data Parameters  
 USER tadpet  
 NAME KT-2-300B  
 EXPNO 2  
 PROCNO 1

F2 - Acquisition Parameters  
 Date\_ 20080628  
 Time 17.55  
 INSTRUM cryo500  
 PROBHD 5 mm CPTCI 1H-  
 PULPROG zgdc30  
 TD 65418  
 SOLVENT CDC13  
 NS 205  
 DS 4  
 SWH 30303.031 Hz  
 FIDRES 0.463222 Hz  
 AQ 1.0794470 sec  
 RG 13004  
 DN 16.500 usec  
 DE 6.00 usec  
 TE 298.0 K  
 D1 0.25000000 sec  
 d11 0.03000000 sec  
 MCREST 0.00000000 sec  
 MCWREK 0.01500000 sec

===== CHANNEL f1 =====  
 NUC1 13C  
 P1 14.75 usec  
 PL1 -1.00 dB  
 SF01 125.7942548 MHz

===== CHANNEL f2 =====  
 CPDPRG2 waltz16  
 NUC2 1H  
 PCPD2 100.00 usec  
 PL2 1.60 dB  
 PL12 24.80 dB  
 SF02 500.2225011 MHz

F2 - Processing parameters  
 SI 65536  
 SF 125.7804190 MHz  
 WDW EM  
 SSB 0  
 LB 1.00 Hz  
 GB 0  
 PC 2.00

ID NMR plot parameters  
 CX 22.80 cm  
 CY 62.35 cm  
 F1P 2303.637 ppm  
 F1 29009.68 Hz  
 F2P -10.287 ppm  
 F2 -1293.96 Hz  
 PPMCM 10.56688 ppm/cm  
 HZCM 1329.10706 Hz/cm

<sup>1</sup>H spectrum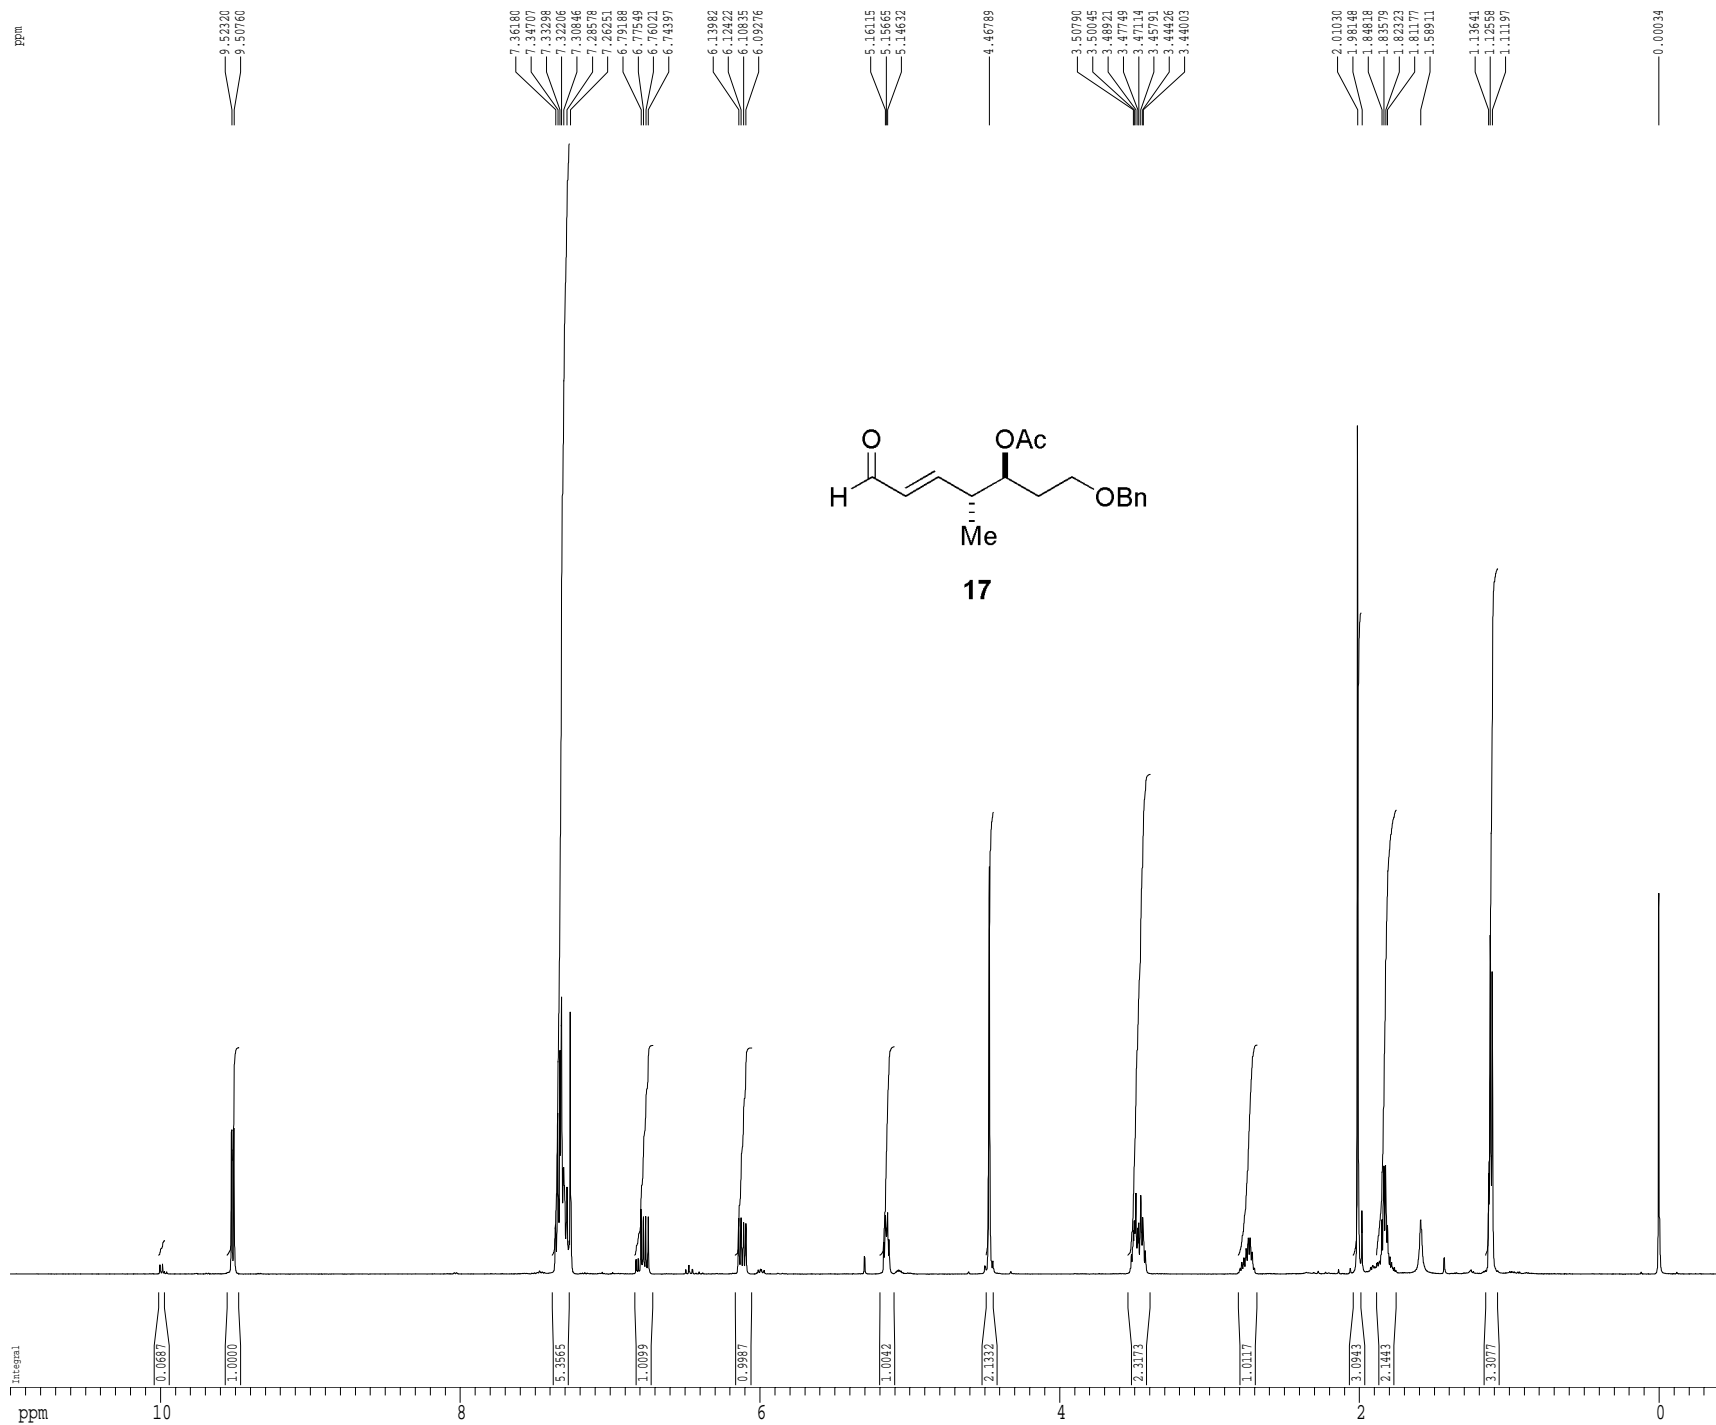

Current Data Parameters  
 USER tadpet  
 NAME KT-2-299  
 EXPNO 1  
 PROCNO 1

F2 - Acquisition Parameters  
 Date\_ 20080625  
 Time 15.54  
 INSTRUM cryo500  
 PROBHD 5 mm CPTCI 1H-  
 PULPROG zg30  
 TD 81728  
 SOLVENT CDCl3T  
 NS 8  
 DS 2  
 SWH 8012.820 Hz  
 FIDRES 0.098043 Hz  
 AQ 5.0998774 sec  
 RG 5.7  
 DW 62.400 usec  
 DE 6.00 usec  
 TE 298.0 K  
 DL 0.10000000 sec  
 MCREST 0.00000000 sec  
 MCWRR 0.01500000 sec

===== CHANNEL f1 =====  
 NUC1 1H  
 P1 7.38 usec  
 PL1 1.60 dB  
 SF01 500.2235015 MHz

F2 - Processing parameters  
 SI 65536  
 SF 500.2200297 MHz  
 WDW EM  
 SSB 0  
 LB 0.30 Hz  
 GB 0  
 PC 4.00

1D NMR plot parameters  
 CX 22.80 cm  
 CY 11.24 cm  
 F1P 11.000 ppm  
 F1 5502.42 Hz  
 F2P -0.500 ppm  
 F2 -250.11 Hz  
 PPMCM 0.50439 ppm/cm  
 HZCM 252.30397 Hz/cm

<sup>13</sup>C spectrum with <sup>1</sup>H decoupling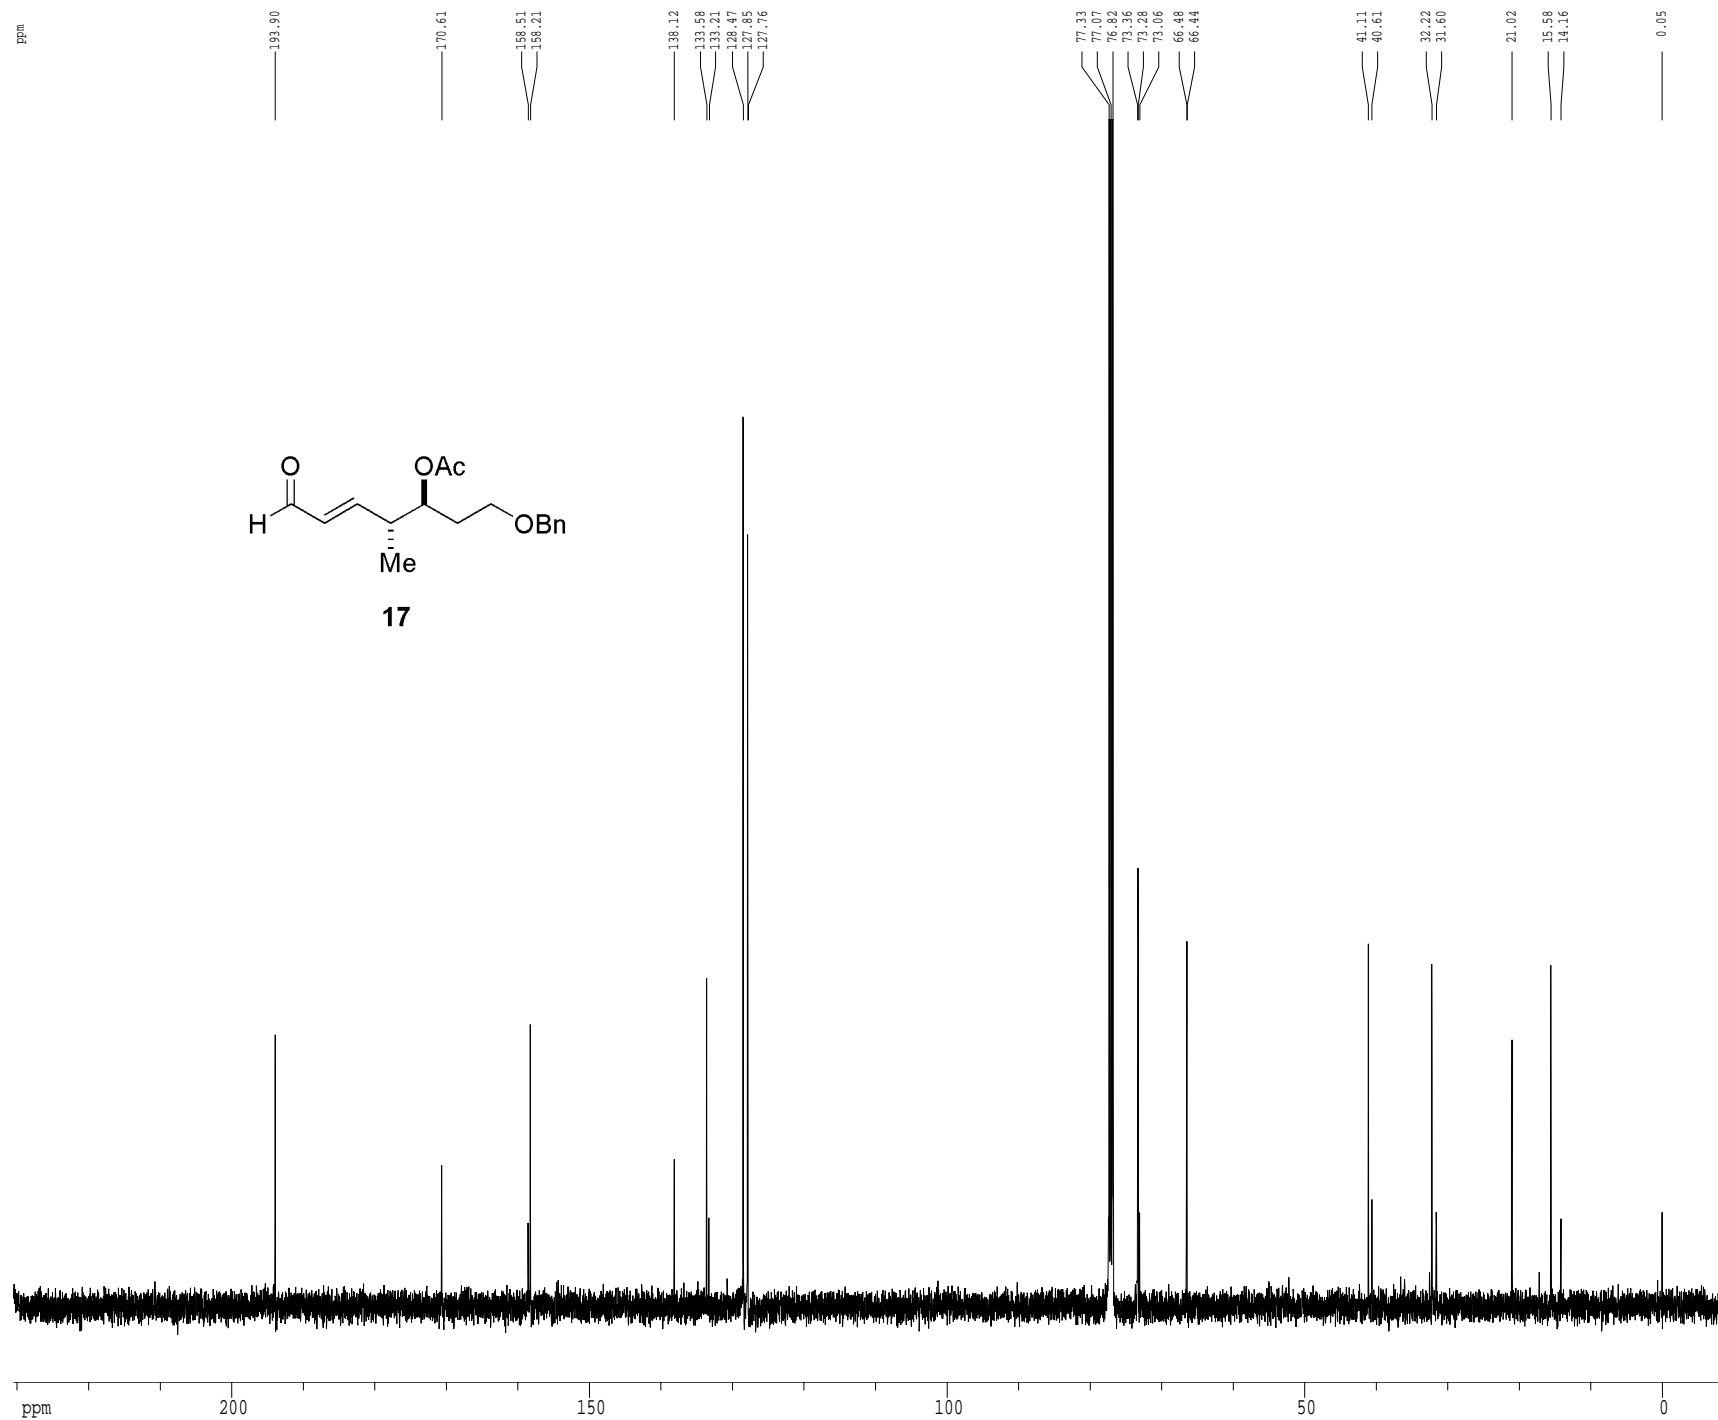

Current Data Parameters  
 USER tadpet  
 NAME KT-2-299  
 EXPNO 2  
 PROCNO 1

F2 - Acquisition Parameters  
 Date\_ 20080625  
 Time 15.59  
 INSTRUM cryo500  
 PROBHD 5 mm CPTCI 1H-  
 PULPROG zgdc30  
 TD 65418  
 SOLVENT CDCl3  
 NS 201  
 DS 4  
 SWH 30303.031 Hz  
 FIDRES 0.463222 Hz  
 AQ 1.0794470 sec  
 RG 8192  
 DN 16.500 usec  
 DE 6.00 usec  
 TE 298.0 K  
 D1 0.25000000 sec  
 d11 0.03000000 sec  
 MCREST 0.00000000 sec  
 MCWREX 0.01500000 sec

===== CHANNEL f1 =====  
 NUC1 13C  
 P1 14.75 usec  
 PL1 -1.00 dB  
 SF01 125.7942548 MHz

===== CHANNEL f2 =====  
 CPDPRG2 waltz16  
 NUC2 1H  
 PCPD2 100.00 usec  
 PL2 1.60 dB  
 PL12 24.80 dB  
 SF02 500.2225011 MHz

F2 - Processing parameters  
 SI 65536  
 SF 125.7804190 MHz  
 WDW EM  
 SSB 0  
 LB 1.00 Hz  
 GB 0  
 PC 2.00

ID NMR plot parameters  
 CX 22.80 cm  
 CY 58.66 cm  
 F1P 230.637 ppm  
 F1 29009.68 Hz  
 F2P -10.287 ppm  
 F2 -1293.96 Hz  
 PPMCM 10.56688 ppm/cm  
 HZCM 1329.10706 Hz/cm
